## High-quality carnivore genomes from roadkill samples enable species delimitation in aardwolf and bat-eared fox

Rémi Allio<sup>1\*</sup>, Marie-Ka Tilak<sup>1</sup>, Céline Scornavacca<sup>1</sup>, Nico L. Avenant<sup>2</sup>, Erwan Corre<sup>3</sup>, Benoit Nabholz<sup>1</sup>, and Frédéric Delsuc<sup>1\*</sup>

<sup>1</sup>Institut des Sciences de l'Evolution de Montpellier (ISEM), CNRS, IRD, EPHE, Université de Montpellier, France [remi.allio@umontpellier.fr](mailto:remi.allio@umontpellier.fr) [marie-ka.tilak@umontpellier.fr](mailto:marie-ka.tilak@umontpellier.fr) [celine.scornavacca@umontpellier.fr](mailto:celine.scornavacca@umontpellier.fr) [benoit.nabholz@umontpellier.fr](mailto:benoit.nabholz@umontpellier.fr) [frederic.delsuc@umontpellier.fr](mailto:frederic.delsuc@umontpellier.fr)

<sup>2</sup>National Museum and Centre for Environmental Management, University of the Free State, Bloemfontein, South Africa [navenant@nasmus.co.za](mailto:navenant@nasmus.co.za)

<sup>3</sup>CNRS, Sorbonne Université, FR2424, ABiMS, Station Biologique de Roscoff, 29680 Roscoff, France [corre@sb-roscoff.fr](mailto:corre@sb-roscoff.fr)

\*Correspondence: [remi.allio@umontpellier.fr](mailto:remi.allio@umontpellier.fr), [frederic.delsuc@umontpellier.fr](mailto:frederic.delsuc@umontpellier.fr)

## 1 **Abstract**

2 In a context of ongoing biodiversity erosion, obtaining genomic resources from wildlife is  
3 becoming essential for conservation. The thousands of yearly mammalian roadkill could  
4 potentially provide a useful source material for genomic surveys. To illustrate the potential of  
5 this underexploited resource, we used roadkill samples to sequence reference genomes and  
6 study the genomic diversity of the bat-eared fox (*Otocyon megalotis*) and the aardwolf  
7 (*Proteles cristata*) for which subspecies have been defined based on similar disjunct  
8 distributions in Eastern and Southern Africa. By developing an optimized DNA extraction  
9 protocol, we successfully obtained long reads using the Oxford Nanopore Technologies  
10 (ONT) MinION device. For the first time in mammals, we obtained two reference genomes  
11 with high contiguity and gene completeness by combining ONT long reads with Illumina  
12 short reads using hybrid assembly. Based on re-sequencing data from few other roadkill  
13 samples, the comparison of the genetic differentiation between our two pairs of subspecies to  
14 that of pairs of well-defined species across Carnivora showed that the two subspecies of  
15 aardwolf might warrant species status (*P. cristata* and *P. septentrionalis*), whereas the two  
16 subspecies of bat-eared fox might not. Moreover, using these data, we conducted  
17 demographic analyses that revealed similar trajectories between Eastern and Southern  
18 populations of both species, suggesting that their population sizes have been shaped by  
19 similar environmental fluctuations. Finally, we obtained a well resolved genome-scale  
20 phylogeny for Carnivora with evidence for incomplete lineage sorting among the three main  
21 arctoid lineages. Overall, our cost-effective strategy opens the way for large-scale population  
22 genomic studies and phylogenomics of mammalian wildlife using roadkill.

23

## 24 **Keywords**

25 Roadkill, Genomics, Population genomics, Phylogenomics, Species delimitation, Carnivora,  
26 Systematics, Genetic differentiation, Mitogenomes, Africa.

## 27 **Introduction**

28 In the context of worldwide biodiversity erosion, obtaining large-scale genomic resources  
29 from wildlife is essential for biodiversity assessment and species conservation. An  
30 underexploited but potentially useful source of material for genomics is the thousands of  
31 annual wildlife fatalities due to collisions with cars. Mammalian roadkill in particular are  
32 unfortunately so frequent that several citizen science surveys have been implemented on this  
33 subject in recent decades (Périquet et al., 2018; Shilling et al., 2015). For example, in South  
34 Africa alone, over 12,000 wildlife road mortality incidents were recorded by The Endangered  
35 Wildlife Trust's Wildlife and Roads Project from 1949 to 2017 (Endangered Wildlife Trust  
36 2017). Initially developed to measure the impact of roads on wildlife, these web-based  
37 systems highlight the amount of car-wildlife collision. The possibility of retrieving DNA  
38 from roadkill tissue samples (Etherington et al., 2020; Maigret, 2019) could provide new  
39 opportunities in genomics by giving access not only to a large number of specimens of  
40 commonly encountered species but also to more elusive species that might be difficult to  
41 sample otherwise.

42 Recent advances in the development of high-throughput sequencing technologies  
43 have made the sequencing of hundreds or thousands of genetic loci cost efficient and have  
44 offered the possibility of using ethanol-preserved tissues, old DNA extracts, and museum  
45 specimens (Blaimer et al., 2016; Guschanski et al., 2013). This method combined with third  
46 generation long read sequencing technologies such as Pacific Biosciences (PacBio) and  
47 Oxford Nanopore Technologies (ONT) sequencing have increased the sizes of the sequenced  
48 molecules from several kilobases to several megabases. The relatively high level of  
49 sequencing errors (10-15%) associated with these technologies can be compensated by  
50 sequencing at a high depth of coverage to avoid sequencing errors in *de novo* genome  
51 assembly and thus obtain reference genomes with high base accuracy, contiguity, and

52 completeness (Koren et al., 2017; Shafin et al., 2020; Vaser et al., 2017). Originally designed  
53 to provide a portable sequencing method in the field, ONT instruments such as the MinION  
54 (Jain et al., 2016) allow direct sequencing of DNA molecules with simplified library  
55 preparation procedures even in tropical environments with elevated temperature and humidity  
56 conditions (Blanco et al., 2019; Parker et al., 2017; Pomerantz et al., 2018; Srivathsan et al.,  
57 2018). This approach is particularly suitable for sequencing roadkill specimens for which it is  
58 notoriously difficult to obtain a large amount of high-quality DNA because of post-mortem  
59 DNA degradation processes. Furthermore, it is possible to correct errors in ONT long reads  
60 by combining them with Illumina short reads, either to polish *de novo* long read-based  
61 genome assemblies (Batra et al., 2019a; Jain et al., 2018; Nicholls et al., 2019; Walker et al.,  
62 2014) or to construct hybrid assemblies (Di Genova et al., 2018; Gan et al., 2019; Tan et al.,  
63 2018; Zimin et al., 2013). In hybrid assembly approaches, the accuracy of short reads with  
64 high depth of coverage (50-100x) allows the use of long reads at lower depth of coverage  
65 (10-30x) essentially for scaffolding (Armstrong et al., 2020; Kwan et al., 2019). A promising  
66 hybrid assembly approach combining short and long read sequencing data has been  
67 implemented in MaSuRCA software (Zimin et al., 2017, 2013). This approach consists of  
68 transforming large numbers of short reads into a much smaller number of longer highly  
69 accurate “super reads” allowing the use of a mixture of read lengths. Furthermore, this  
70 method is designed to tolerate a significant level of sequencing error. Initially developed to  
71 address short reads from Sanger sequencing and longer reads from 454 Life Sciences  
72 instruments, this method has already shown promising results for combining Illumina and  
73 ONT/PacBio sequencing data in several taxonomic groups, such as plants (Scott et al., 2020;  
74 Wang et al., 2020; Zimin et al., 2017), birds (Gan et al., 2019), and fishes (Jiang et al., 2019;  
75 Kadobianskyi et al., 2019; Tan et al., 2018) but not yet in mammals.



76 To illustrate the potential of roadkill as a useful resource for whole genome  
77 sequencing and assembly, we studied two of the most frequently encountered mammalian  
78 roadkill species in South Africa (Périquet et al., 2018): the bat-eared fox (*Otocyon megalotis*,  
79 Canidae) and the aardwolf (*Proteles cristata*, Hyaenidae). These two species are among  
80 several African vertebrate taxa presenting disjunct distributions between Southern and  
81 Eastern African populations that are separated by more than a thousand kilometres (e.g.  
82 Ostrich (Miller et al., 2011), Ungulates Lorenzen et al. 2012). Diverse biogeographical  
83 scenarios involving the survival and divergence of populations in isolated savannah refugia  
84 during the climatic oscillations of the Pleistocene have been proposed to explain these  
85 disjunct distributions in ungulates (Lorenzen et al., 2012). Among Carnivora, subspecies have  
86 been defined based on this peculiar allopatric distribution not only for the black-backed  
87 jackal (*Canis mesomelas*; Walton and Joly 2003) but also for both the bat-eared fox (Clark,  
88 2005) and the aardwolf (Koehler and Richardson, 1990) (**Fig. 1**). The bat-eared fox is divided  
89 into the Southern bat-eared fox (*O. megalotis megalotis*) and the Eastern bat-eared fox (*O.*  
90 *megalotis virgatus*) (Clark, 2005), and the aardwolf is divided into the Southern aardwolf (*P.*  
91 *cristata cristata*) and the Eastern aardwolf (*P. cristata septentrionalis*) (Koehler and  
92 Richardson, 1990). However, despite known differences in behaviour between subspecies  
93 within both species (Wilson et al., 2009), no genetic or genomic assessment of population  
94 differentiation has been conducted to date. In other taxa, similar allopatric distributions have  
95 led to genetic differences between populations and several studies reported substantial  
96 intraspecific genetic structuration between Eastern and Southern populations (Atickem et al.,  
97 2018; Barnett et al., 2006; Dehghani et al., 2008; Lorenzen et al., 2012; Miller et al., 2011;  
98 Rohland et al., 2005). Here we investigate whether similar genetic structuration and  
99 population differentiation have occurred between subspecies of bat-eared fox and aardwolf  
100 using whole genome data.

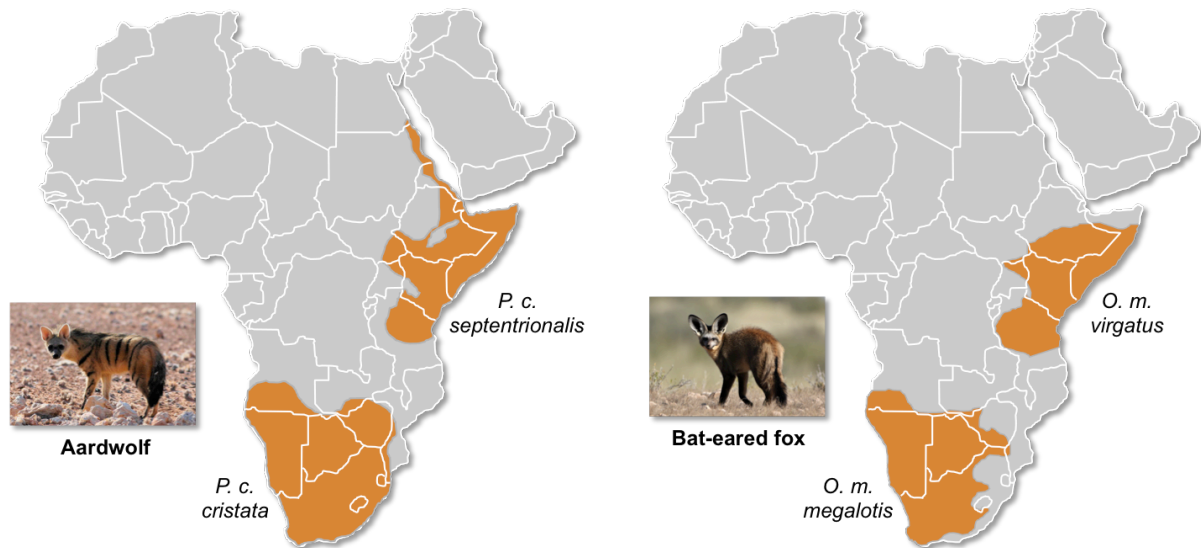

101

102 **Figure 1.** Disjunct distributions of the aardwolf (*Proteles cristata*) and the bat-eared fox (*Otocyon megalotis*) in  
103 Eastern and Southern Africa. Within each species, two subspecies have been recognized based on their  
104 distributions and morphological differences (Clark, 2005; Koehler and Richardson, 1990).

105 To evaluate the taxonomic status of the proposed subspecies within both *O. megalotis*  
106 and *P. cristata*, we first sequenced and assembled two reference genomes from roadkill  
107 samples by combining ONT long reads and Illumina short reads using the MaSuRCA hybrid  
108 assembler. The quality of our genome assemblies was assessed by comparison to available  
109 mammalian genome assemblies. Then, to estimate the genetic diversity of these species and  
110 to perform genome-scale species delimitation analyses, two additional individuals from the  
111 disjunct South African and Tanzanian populations of both species were resequenced at high  
112 depth of coverage using Illumina short reads. Using this additional population genomic data,  
113 we estimated the genetic diversity and differentiation of each subspecies pair via an  $F_{ST}$ -like  
114 measure, which we called the genetic differentiation index, and the result compared with the  
115 genetic differentiation among pairs of well-established carnivoran species. Our results  
116 indicate that the two subspecies of *P. cristata* might warrant species status whereas the two  
117 subspecies of *O. megalotis* may not. Our results showing that high-quality reference  
118 mammalian genomes could be obtained through combination of short- and long-read

119 sequencing methods provide opportunities for large-scale population genomic studies of  
120 mammalian wildlife using (re)sequencing of samples collected from roadkill.

121

## 122 **Results**

### 123 *Mitochondrial diversity within Carnivora*

124 The first dataset, composed of complete carnivoran mitogenomes available in GenBank  
125 combined with the newly generated sequences of the two subspecies of *P. cristata*, the two  
126 subspecies of *O. megalotis*, *Parahyaena brunnea*, *Speothos venaticus* and *Vulpes vulpes*, plus  
127 the sequences extracted from UCE libraries for *Bdeogale nigripes*, *Fossa fossana*, and  
128 *Viverra zangalunga*, consists of 142 species or subspecies representing all families of  
129 Carnivora. Maximum likelihood (ML) analyses reconstructed a robust mitogenomic  
130 phylogeny, with 91.4% of the nodes (128 out of 140) recovered with bootstrap support higher  
131 than 95% (**Fig. 2a**). The patristic distances based on complete mitogenomes between the  
132 allopatric subspecies of aardwolf and bat-eared fox were 0.045 and 0.020 substitutions per  
133 site, respectively (**Table S1**). These genetic distances are comparable to those observed  
134 between different well-defined species of Carnivora such as the red fox (*Vulpes vulpes*) and  
135 the fennec (*Vulpes zerda*) (0.029) or the Steppe polecat (*Mustela eversmannii*) and the  
136 Siberian weasel (*Mustela sibirica*) (0.034) (see **Table S1**).

137 To further assess the genetic distances between the two pairs of subspecies and  
138 compare them to both polymorphism and divergence values observed across Carnivora, two  
139 supplemental datasets including at least two individuals per species were assembled by  
140 retrieving all COX1 and CYTB sequences, which are the two widely sequenced  
141 mitochondrial markers for carnivores, available on GenBank. These datasets include 3,657  
142 COX1 sequences for 150 species and 6,159 CYTB sequences for 203 species of Carnivora.  
143 After adding the corresponding sequences from the newly assembled mitogenomes, ML

144 phylogenetic inference was conducted on each dataset (**Supplementary materials**). The  
145 patristic distances between all tips of the resulting phylogenetic trees were measured and  
146 classified into two categories: (i) intraspecific variation (polymorphism) for distances inferred  
147 among individuals of the same species and (ii) interspecific divergence for distances inferred  
148 among individuals of different species. Despite an overlap between polymorphism and  
149 divergence in both mitochondrial genes, this analysis revealed a threshold between  
150 polymorphism and divergence of approximately 0.02 substitutions per site for Carnivora  
151 (**Fig. 2b**). With a nucleotide distance of 0.054 for both COX1 and CYTB, the genetic  
152 distance observed between the two subspecies of aardwolf (*Proteles* spp.) was higher than the  
153 majority of the intraspecific distances observed across Carnivora. However, with a nucleotide  
154 distances of 0.020 for COX1 and 0.032 for CYTB, the genetic distance observed between the  
155 two subspecies of bat-eared fox (*Otocyon* spp.) was clearly in the ambiguous zone and did not  
156 provide a clear indication of the specific taxonomic status of these populations.

157 Finally, to test whether the two pairs of allopatric subspecies diverged synchronously  
158 or in two different time periods, Bayesian molecular dating inferences were performed on the  
159 142-taxon ML mitogenomic tree. The resulting divergence times were slightly different  
160 depending on the clock model used (strict clock [CL], autocorrelated [LN or TK02] and  
161 uncorrelated [UGAM or UCLM]) (**Supplementary materials**). Cross-validation analyses  
162 resulted in the selection of the LN and UGAM models as the models with the best fit based  
163 on a higher cross-likelihood score than that of CL (LN and UGAM versus CL mean scores =  
164  $35 \pm 8$ ). Unfortunately, these two statistically indistinguishable models provided different  
165 divergence times for the two pairs of subspecies, with LN favouring a synchronous  
166 divergence (approximately 1 Mya [95% credibility interval (CI) : 6.72 - 0.43]; **Table S2**),  
167 while UGAM favoured an asynchronous divergence (~0.6 [CI: 0.83 - 0.39] Mya for *O.*  
168 *megalotis* spp. and ~1.3 [CI: 1.88 - 0.93] Mya for *P. cristata* spp.; **Table S2**). However, the

169 three chains performed with the UGAM model recovered highly similar ages for the two  
170 nodes of interest with low CI 95% values whereas the three chains performed with the LN  
171 model recovered less similar ages between chains and high CI 95% values (Table 1). Visual  
172 inspection of the likelihood trajectories for the LN chains seems to indicate general lack of  
173 convergence caused by several local optima.  
174

a) Mitogenomic phylogeny

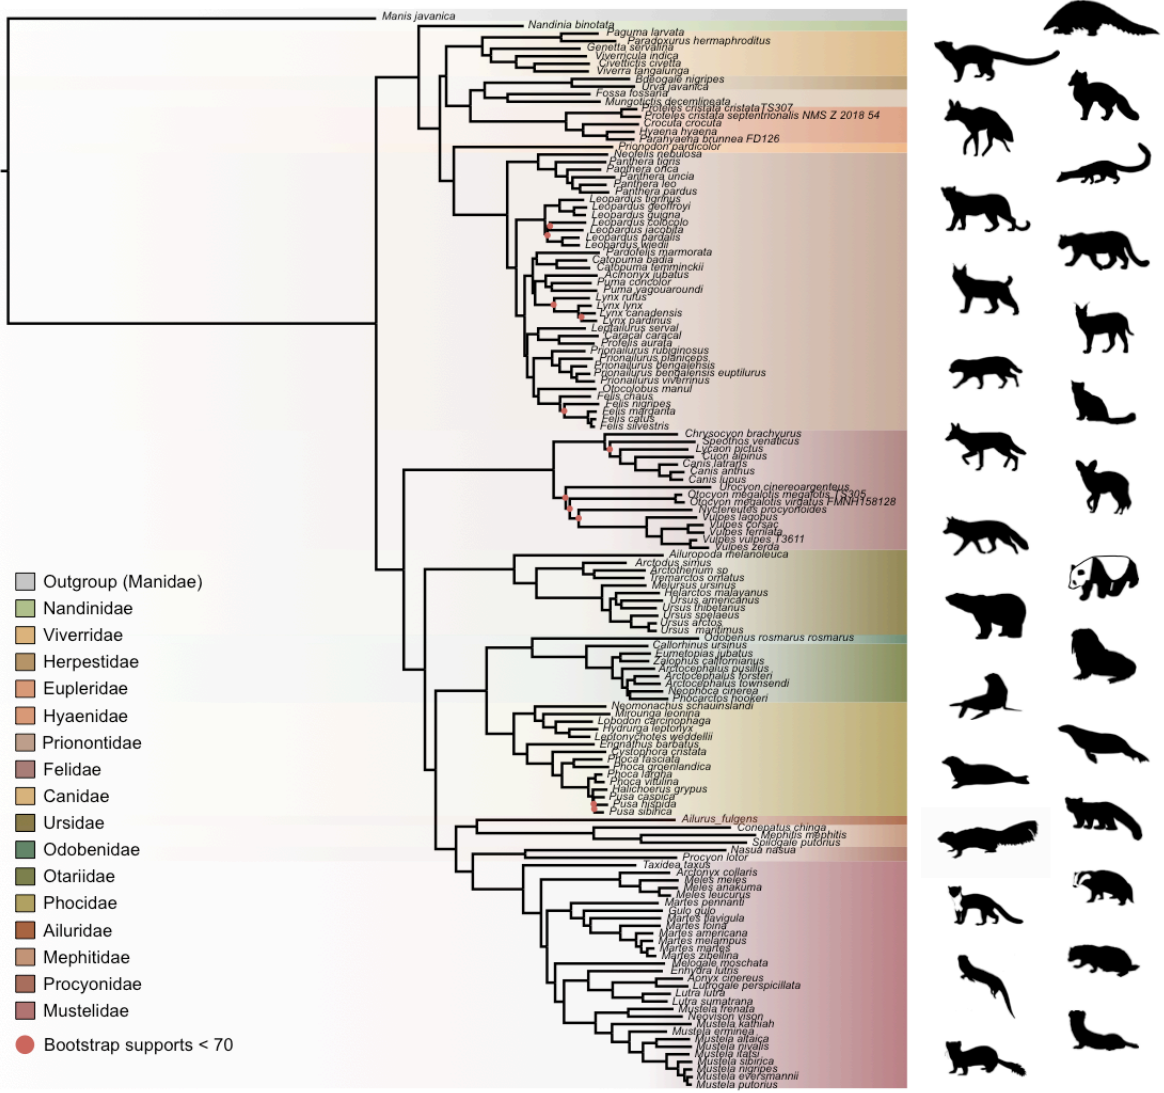

b) Patristic distances for COX1 and CYTB genes

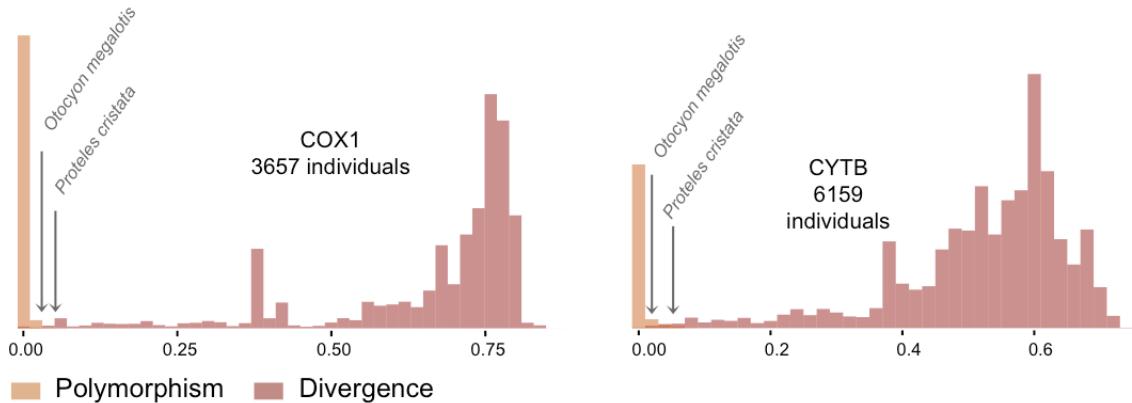

175  
176  
177  
178  
179  
180

**Figure 2.** Representation of the mitochondrial genetic diversity within Carnivora with a) the mitogenomic phylogeny inferred from 142 complete Carnivora mitogenomes including those of the two populations of aardwolf (*Proteles cristata*) and bat-eared fox (*Otocyon megalotis*) and b) intraspecific (orange) and the interspecific (red) genetic diversities observed for the two mitochondrial markers COX1 and CYTB.

## 181 *Assembling reference genomes from roadkill*

182 Considering the DNA quality and purity required to perform single-molecule sequencing  
 183 with ONT, a specific protocol to extract DNA from roadkill was developed (Tilak et al.,  
 184 2020). This protocol was designed to specifically select the longest DNA fragments present  
 185 in the extract also containing short degraded fragments. This protocol increased the median  
 186 size of the sequenced raw DNA fragments three-fold in the case of aardwolf (Tilak et al.,  
 187 2020). In total, after high-accuracy basecalling, adapter trimming, and quality filtering, 27.3  
 188 Gb of raw Nanopore long reads were sequenced using 16 MinION flow cells for the Southern  
 189 aardwolf (*P. c. cristata*) and 33.0 Gb using 13 flow cells for the Southern bat-eared fox (*O.*  
 190 *m. megalotis*) (Table 1). Due to quality differences among the extracted tissues for both  
 191 species, the N50 of the DNA fragment size for *P. cristata* (9,175 bp) was about twice higher  
 192 than the N50 of the DNA fragment size obtained for *O. megalotis* (4,393 bp). The quality of  
 193 the reads basecalled with the *high accuracy* option of Guppy was significantly higher than the  
 194 quality of those translated with the *fast* option, which led to better assemblies (see Fig. S1).  
 195 Complementary Illumina sequencing returned 522.8 and 584.4 million quality-filtered reads  
 196 per species corresponding to 129.5 Gb (expected coverage = 51.8x) and 154.8 Gb (expected  
 197 coverage = 61.6x) for *P. c. cristata* and *O. m. megalotis*, respectively. Regarding the  
 198 resequenced individuals of each species, on average 153.5 Gb were obtained with Illumina  
 199 resequencing (Table 1).

| Individuals              |                 |            | Illumina      |               |                  |                    | Oxford Nanopore Sequencing |                   |       |              |                    | Assembly statistics |               |          |             |           |                  |
|--------------------------|-----------------|------------|---------------|---------------|------------------|--------------------|----------------------------|-------------------|-------|--------------|--------------------|---------------------|---------------|----------|-------------|-----------|------------------|
| Species                  | Subspecies      | Voucher    | Raw reads (M) | Cleaned reads | Nbr of gigabases | Estimated coverage | Nbr of flowcells           | Nbr of bases (Gb) | N50   | Average size | Estimated coverage | Genome size (Gb)    | Nbr of scaff. | N50 (kb) | Busco score | OMM genes | Missing data (%) |
| <i>Proteles cristata</i> | cristata        | TS307      | 716.7         | 522.8         | 129.50           | 51.8               | 16                         | 27.3              | 9,175 | 5,555        | 10.9               | 2.39                | 5,669         | 1,309    | 92.8        | 12,062    | 22.43            |
| <i>Proteles cristata</i> | cristata        | TS491      | 663.8         | 526.1         | 140.73           | 56.3               | NA                         |                   |       |              |                    | NA                  |               |          | NA          |           |                  |
| <i>Proteles cristata</i> | septentrionalis | NMSZ201854 | 750.9         | 516.2         | 132.44           | 53.0               | NA                         |                   |       |              |                    | NA                  |               |          | 12,050      | 22.96     |                  |
| <i>Otocyon megalotis</i> | megalotis       | TS305      | 710.2         | 584.4         | 154.81           | 61.6               | 13                         | 33                | 4,393 | 3,092        | 13.2               | 2.75                | 11,081        | 728      | 92.9        | 11,981    | 22.02            |
| <i>Otocyon megalotis</i> | megalotis       | TS306      | 861.2         | 820           | 240.71           | 96.3               | NA                         |                   |       |              |                    | NA                  |               |          |             |           |                  |
| <i>Otocyon megalotis</i> | virgatus        | FMNH158128 | 661.7         | 554.1         | 100.30           | 40.1               | NA                         |                   |       |              |                    | NA                  |               |          |             |           |                  |

200 **Table 1.** Summary of sequencing and assembly statistics of the genomes generated in this study.  
 201



202           The two reference genomes were assembled using MinION long reads and Illumina  
203 short reads in combination with MaSuRCA v3.2.9 (Zimin et al., 2013). Hybrid assemblies for  
204 both species were obtained with a high degree of contiguity with only 5,669 scaffolds and an  
205 N50 of 1.3 Mb for the aardwolf (*P. cristata*) and 11,081 scaffolds and an N50 of 728 kb for  
206 the bat-eared fox (*O. megalotis*) (**Table 1**). Exhaustive comparisons with 503 available  
207 mammalian assemblies revealed a large heterogeneity among taxonomic groups and a wide  
208 variance within groups in terms of both number of scaffolds and N50 values (**Fig. 3, Table**  
209 **S3**). Xenarthra was the group with the lowest quality genome assemblies, with a median  
210 number of scaffolds of more than one million and a median N50 of only 15 kb. Conversely,  
211 Carnivora contained genome assemblies of much better quality, with a median number of  
212 scaffolds of 15,872 and a median N50 of 4.6 Mb, although a large variance was observed  
213 among assemblies for both metrics (**Fig. 3, Table S3**). Our two new genomes compared  
214 favourably with the available carnivoran genome assemblies in terms of contiguity showing  
215 slightly less than the median N50 and a lower number of scaffolds than the majority of the  
216 other assemblies (**Fig. 3, Table S3**). Comparison of two hybrid assemblies with Illumina-  
217 only assemblies obtained with SOAPdenovo illustrated the positive effect of introducing  
218 Nanopore long reads even at moderate coverage by reducing the number of scaffolds from  
219 409,724 to 5,669 (aardwolf) and from 433,209 to 11,081 (bat-eared fox) while increasing the  
220 N50 from 17.3 kb to 1.3 Mb (aardwolf) and from 22.3 kb to 728 kb (bat-eared fox). With  
221 regard to completeness based on 4,104 single-copy mammalian BUSCO orthologues, our two  
222 hybrid assemblies are among the best assemblies with more than 90% complete BUSCO  
223 genes and less than 4% missing genes (**Fig. 4, Table S4**). As expected, the two corresponding  
224 Illumina-only assemblies were much more fragmented and had globally much lower BUSCO  
225 scores (**Fig. 4, Table S4**).

226



227

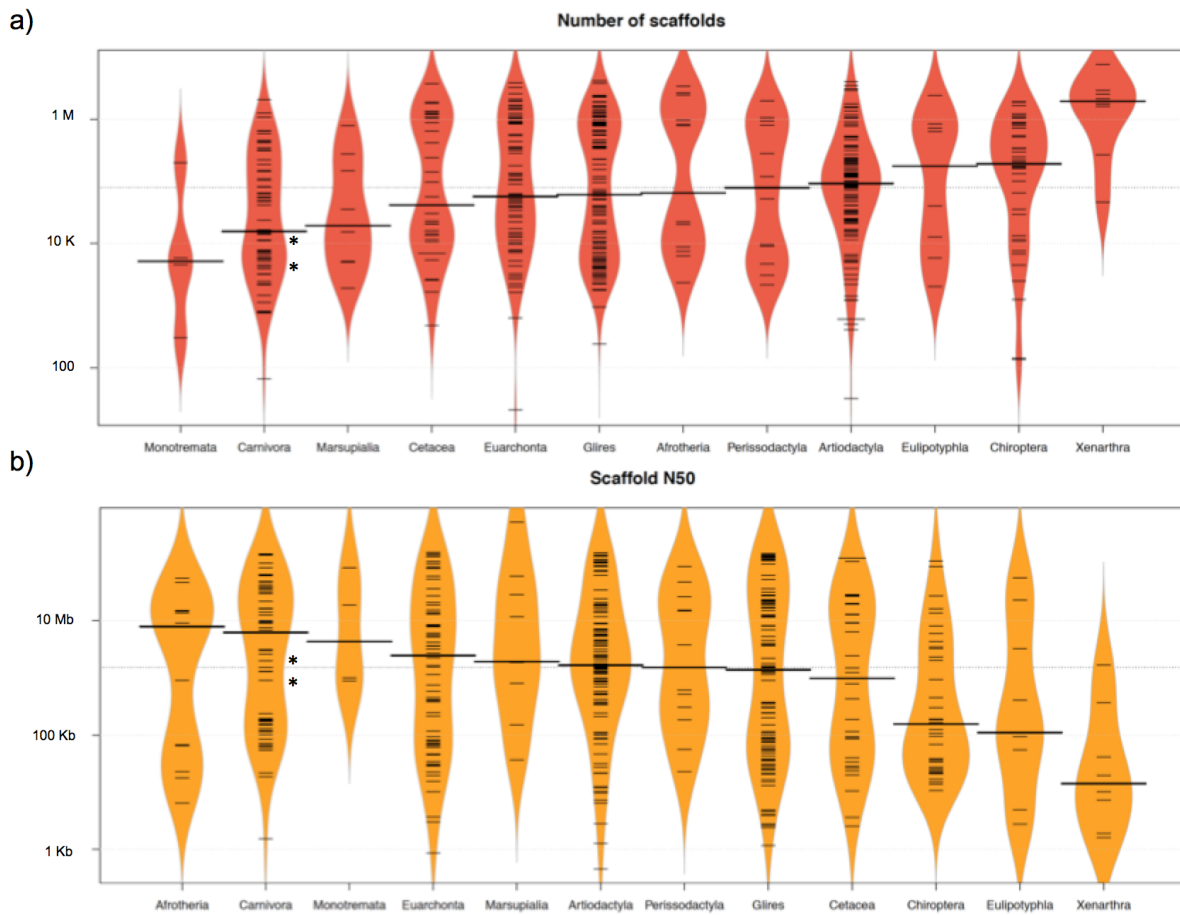

228

229 **Figure 3.** Comparison of 503 mammalian genome assemblies from 12 taxonomic groups using bean plots of the  
230 a) number of scaffolds, and b) scaffold N50 values ranked by median values. Thick black lines show the  
231 medians, dashed black lines represent individual data points, and polygons represent the estimated density of the  
232 data. Note the log scale of the Y axes. The bat-eared fox (*Otocyon megalotis*) and aardwolf (*Proteles cristata*)  
233 assemblies produced in this study using SOAPdenovo and MaSuRCA are indicated by asterisks. Bean plots  
234 were computed using BoxPlotR (Spitzer et al., 2014).

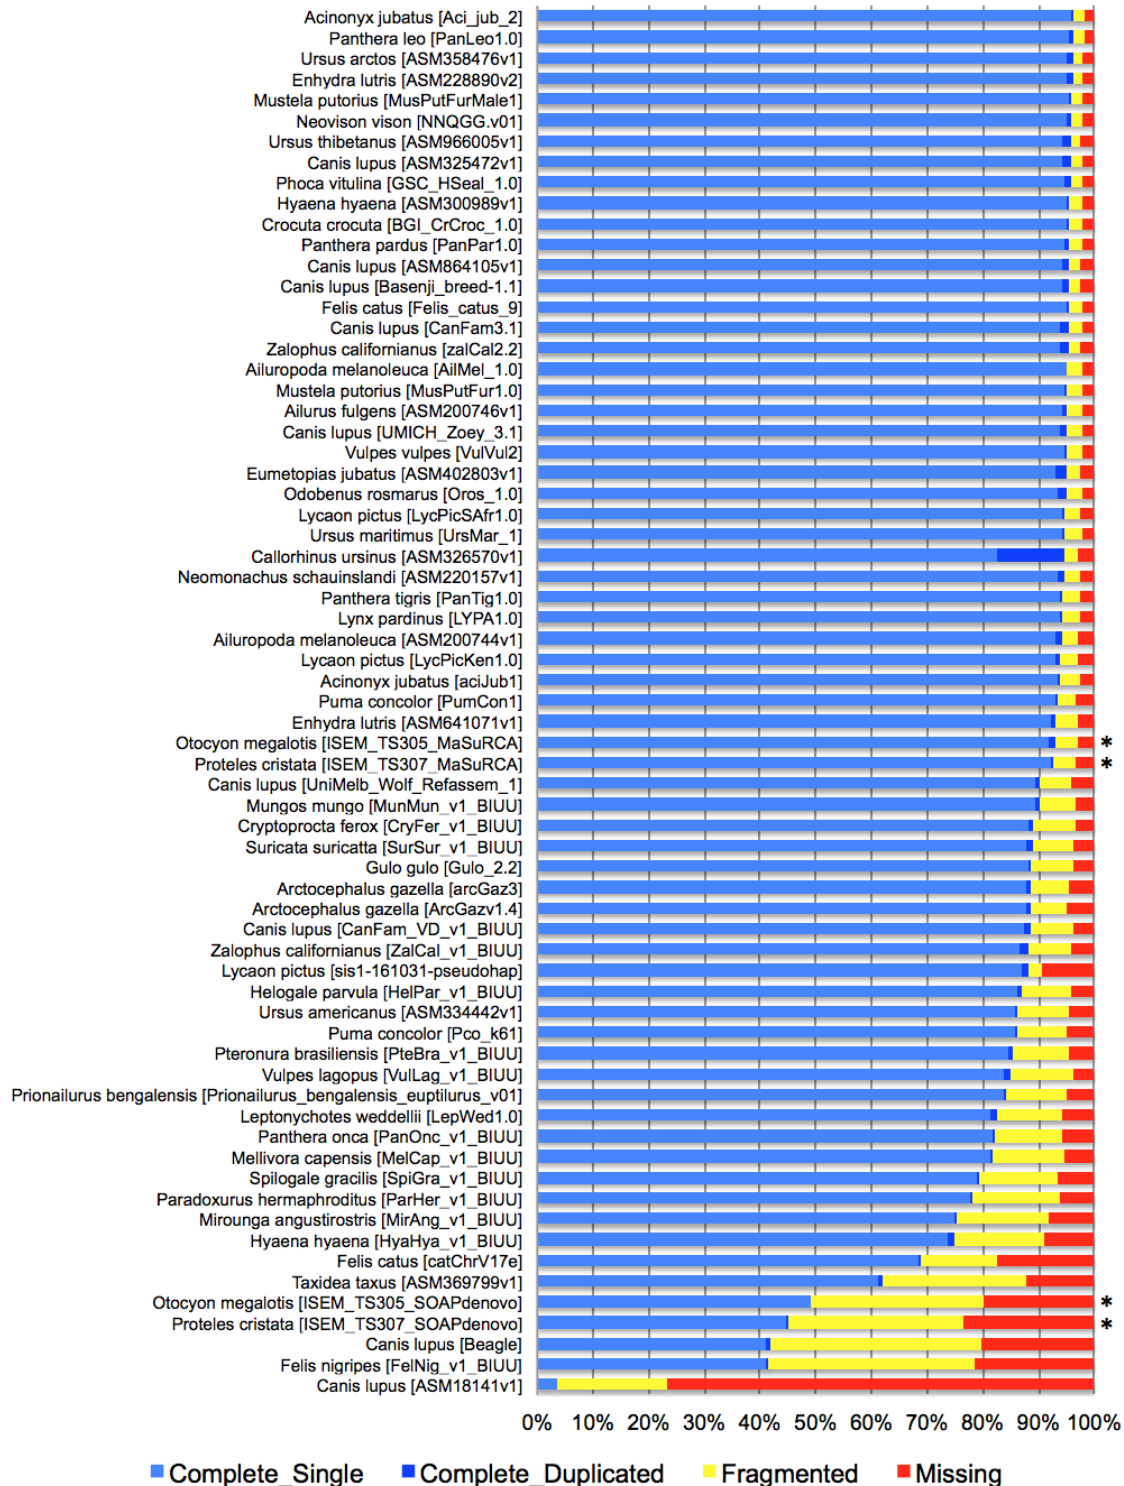

235

236

237

238

239

240

241

**Figure 4.** BUSCO completeness assessment of 67 Carnivora genome assemblies visualized as bar charts representing percentages of complete single-copy (light blue), complete duplicated (dark blue), fragmented (yellow), and missing (red) genes ordered by increasing percentage of total complete genes. The bat-eared fox (*Otocyon megalotis*) and aardwolf (*Proteles cristata*) assemblies produced in this study using MaSuRCA and SOAPdenovo are indicated by asterisks.

## 242 *Genome-wide analyses of population structure*

243 To evaluate the population structure between the subspecies of *P. cristata* and *O. megalotis*,  
244 the number of shared heterozygous sites, unique heterozygous sites, and homozygous sites  
245 between individuals was computed to estimate an FST-like statistic (hereafter called the  
246 *genetic differentiation index* or GDI). Since we were in possession of two individuals for the  
247 Southern subspecies and only one for the Eastern subspecies of both species, the genetic  
248 differentiation between the two individuals within the Southern subspecies and between the  
249 Southern and Eastern subspecies was computed. To account for the variation across the  
250 genome, 10 replicates of 100 regions with a length of 100 kb were randomly chosen to  
251 estimate genetic differentiation. Interestingly, in both species, the mean heterozygosity was  
252 higher in the Southern subspecies than in the Eastern subspecies. For aardwolf, the mean  
253 heterozygosity was 0.189 per kb (sd = 0.010) in the Southern population and 0.121 per kb (sd  
254 = 0.008) in the Eastern population. For the bat-eared fox, the mean heterozygosity was 0.209  
255 per kb (sd = 0.013) in the Southern population and 0.127 per kb (sd = 0.003) in the Eastern  
256 population. This heterozygosity level is low compared to those of other large mammals  
257 (Diez-del-Molino et al 2018) and is comparable to that of the Iberian lynx, the cheetah or the  
258 brown hyena, which have notoriously low genetic diversity (Abascal et al., 2016; Casas-  
259 Marce et al., 2013; Westbury et al., 2018).

260 Since we had very limited power to fit the evolution of the genetic differentiation  
261 statistics with a hypothetical demographic scenario because of our limited sample size, we  
262 chose a comparative approach and applied the same analyses to four well-defined species  
263 pairs of carnivorans for which similar individual sampling was available. The genetic  
264 differentiation estimates between the two individuals belonging to the same subspecies  
265 (Southern populations in both cases) were on average equal to 0.005 and 0.014 for *P. c.*  
266 *cristata* and *O. m. megalotis*, respectively. This indicated that the polymorphism observed in

267 the two individuals within the Southern subspecies of each species was comparable (genetic  
268 differentiation index close to 0) and thus that these two subpopulations are likely panmictic  
269 (**Fig. 5**). In contrast, the genetic differentiation estimates for the two pairs of individuals  
270 belonging to the different subspecies were respectively equal to 0.533 and 0.294 on average  
271 for *P. cristata* ssp. and *O. megalotis* ssp., indicating that the two disjunct populations are  
272 genetically structured. To contextualize these results, the same genetic differentiation  
273 measures were estimated for four other well-defined species pairs (**Fig. 5**). First, the  
274 comparison of the polymorphism of two individuals of the same species led to intraspecific  
275 GDIs ranging from 0.029 on average for polar bear (*Ursus maritimus*) to 0.137 for lion  
276 (*Panthera leo*). As expected, comparing the polymorphisms of two individuals between  
277 closely related species led to a higher interspecific GDI ranging from 0.437 on average for  
278 the wolf/golden jackal (*Canis lupus/Canis aureus*) pair to 0.760 for the lion/leopard (*P.*  
279 *leo/Panthera pardus*) pair (**Fig. 5**). The genetic differentiation indices between the grey wolf  
280 (*C. lupus*) and the golden jackal (*C. aureus*) averaged 0.44, indicating that the two subspecies  
281 of aardwolf (GDI = 0.533) are genetically more differentiated than these two well-defined  
282 species, and only slightly less differentiated than the brown bear (*Ursus arctos*) and the polar  
283 bear (*U. maritimus*). Conversely, the genetic differentiation obtained between the bat-eared  
284 fox subspecies (GDI = 0.294) were lower than the genetic differentiation estimates obtained  
285 for any of the four reference species pairs evaluated here (**Fig. 5**).

286

287

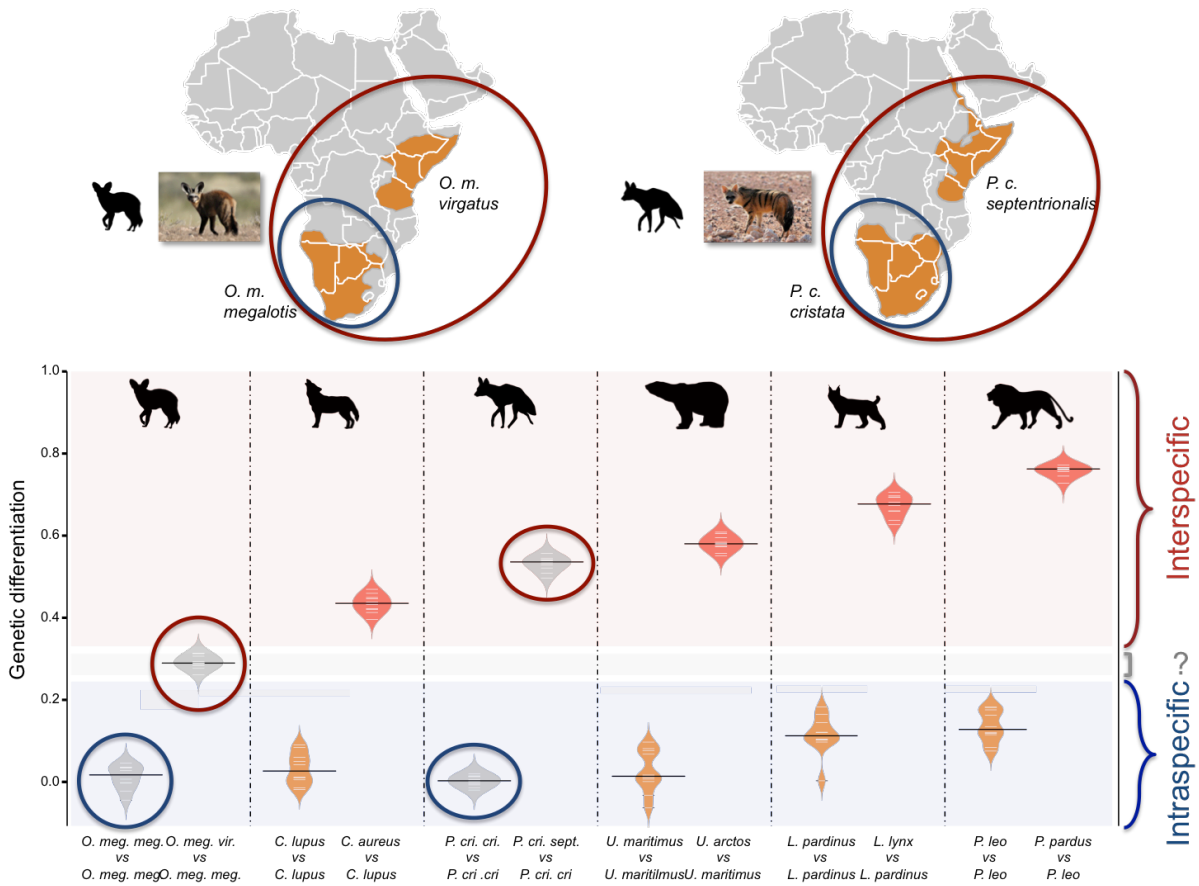

288

289 **Figure 5:** Genetic differentiation indices obtained from the comparison of intraspecific (orange) and  
 290 interspecific (red) polymorphisms in four pairs of well-defined Carnivora species and for the subspecies of  
 291 aardwolf (*Proteles cristata*) and bat-eared fox (*Otocyon megalotis*) (grey).

292

### 293 *Effective population size reconstructions*

294 We used the pairwise sequential Markovian coalescent (PSMC) model to estimate the  
 295 ancestral effective population size ( $N_e$ ) trajectory over time for each sequenced individual.

296 For both the aardwolf and the bat-eared fox, the individual from Eastern African populations  
 297 showed a continuous decrease in  $N_e$  over time, leading to the recent  $N_e$  being lower than that

298 in Southern African populations (**Fig. 6**). This is in agreement with the lower heterozygosity  
 299 observed in the Eastern individuals of both species. For the bat-eared fox, the trajectories of

300 the three sampled individuals were synchronised approximately 200 kya ago (**Fig. 6a**), which  
 301 could correspond to the time of divergence between the Southern and Eastern populations. In

302 contrast, the  $N_e$  trajectories for the aardwolf populations did not synchronise over the whole

303 period (~2 Myrs). Interestingly, the Southern populations of both species showed a marked  
304 increase in population size between ~10-30 kya before sharply decreasing in more recent  
305 times (**Fig. 6**).

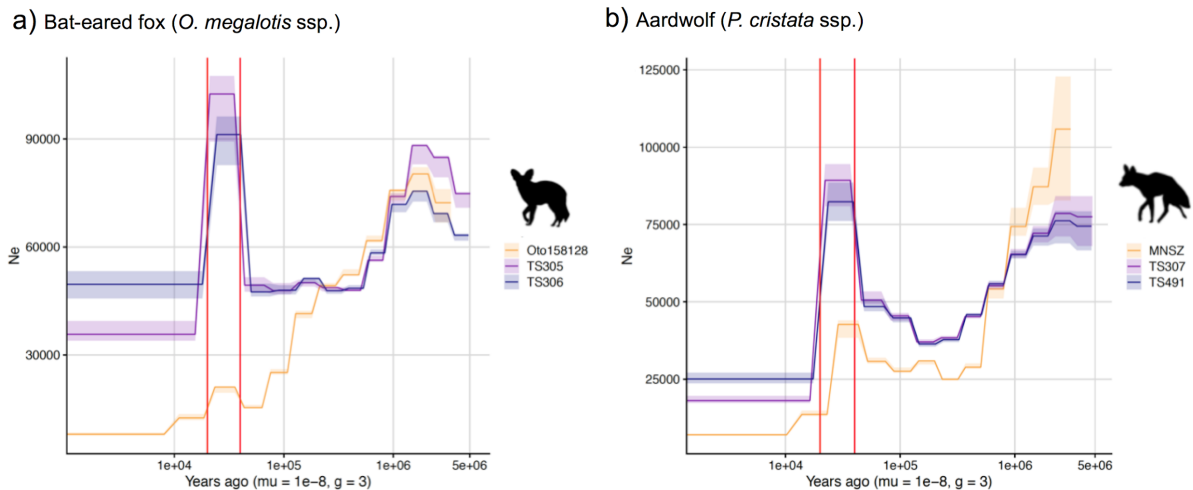

306

307 **Figure 6:** PSMC estimates of the change in effective population size over time for the Eastern (orange) and  
308 Southern (blue and purple) populations of a) bat-eared fox and b) aardwolf.  $\mu$  = mutation rate of  $10^{-8}$  mutations  
309 per site per generation and  $g$  = generation time of 2 years. Vertical red lines indicate 20kyrs and 40kyrs.

310

### 311 *Phylogenomics of Carnivora*

312 Phylogenetic relationships within Carnivora were inferred from a phylogenomic dataset  
313 comprising 52 carnivoran species (including the likely new *Proteles septentrionalis* species)  
314 representing all but two families of Carnivora (Nandiniidae and Prionodontidae). The non-  
315 annotated genome assemblies of these different species were annotated with a median of  
316 18,131 functional protein-coding genes recovered for each species. Then, single-copy  
317 orthologous gene identification resulted in a median of 12,062 out of the 14,509 single-copy  
318 orthologues extracted from the OrthoMaM database for each species, ranging from a  
319 minimum of 6,305 genes for the California sea lion (*Zalophus californianus*) and a maximum  
320 of 13,808 for the dog (*Canis lupus familiaris*) (**Table S5**). Our new hybrid assemblies  
321 allowed the recovery of 12,062 genes for the Southern aardwolf (*P. c. cristata*), 12,050 for  
322 the Eastern aardwolf (*P. c. septentrionalis*), and 11,981 for the Southern bat-eared fox (*O. m.*

323 *megalotis*) (**Table 1**). These gene sets were used to create a supermatrix consisting of 14,307  
324 genes representing a total of 24,041,987 nucleotide sites with 6,495,611 distinct patterns  
325 (27.0%) and 22.8% gaps or undetermined nucleotides.

326 Phylogenomic inference was first performed on the whole supermatrix using ML. The  
327 resulting phylogenetic tree was highly supported, with all but one node being supported by  
328 maximum bootstrap (UFBS) values (**Fig. 7**). To further dissect the phylogenetic signal  
329 underlying this ML concatenated topology, we measured gene concordance (gCF) and site  
330 concordance (sCF) factors to complement traditional bootstrap node-support values. For each  
331 node, the proportion of genes (gCF) or sites (sCF) that supported the node inferred with the  
332 whole supermatrix was compared to the proportion of the genes (gDF) or sites (sDF) that  
333 supported an alternative resolution of the node (**Fig. 7, Supplementary materials**). Finally, a  
334 coalescent-based approximate species tree inference was performed using ASTRAL-III based  
335 on individual gene trees (**Supplementary materials**). Overall, the three different analyses  
336 provided well-supported and almost identical results (**Fig. 7**). The order Carnivora was  
337 divided into two distinct suborders: a cat-related clade (Feliformia) and a dog-related clade  
338 (Caniformia). Within Feliformia, the first split separated Felidae (felids) from Viverroidea, a  
339 clade composed of the four families Viverridae (civets and genets), Eupleridae (fossa),  
340 Herpestidae (mongooses), and Hyaenidae (hyaenas). In hyaenids, the two species of termite-  
341 eating aardwolves (*P. cristata* and *P. septentrionalis*) were the sister-group of a clade  
342 composed of the carnivorous spotted (*Crocuta crocuta*) and striped (*Hyaena hyaena*) hyenas.  
343 Congruent phylogenetic relationships among Feliformia families and within hyaenids were  
344 also retrieved with the mitogenomic data set (**Fig. 2a**). The short internal nodes of Felidae  
345 were the principal source of incongruence among the three different analyses with  
346 concordance factor analyses pointing to three nodes for which many sites and genes support  
347 alternative topologies (**Fig. 7**) including one node for which the coalescent-based



348 approximate species tree inference supported an alternative topology (**Supplementary**  
349 **materials**) to the one obtained with ML on the concatenated supermatrix. In Viverroidea,  
350 Viverridae split early from Herpestoidea regrouping Hyaenidae, Herpestidae, and Eupleridae,  
351 within which Herpestidae and Eupleridae formed a sister clade to Hyaenidae. Within  
352 Caniformia, Canidae (canids) was recovered as a sister group to Arctoidea. Within Canidae,  
353 in accordance with the mitogenomic phylogeny, the Vulpini tribe, represented by *O.*  
354 *megalotis* and *V. vulpes*, was recovered as the sister clade of the Canini tribe, represented  
355 here by *Lycaon pictus* and *C. l. familiaris*. The Arctoidea were recovered as a major clade  
356 composed of eight families grouped into three subclades: Ursoidea (Ursidae), Pinnipedia  
357 (Otariidae, Odobedinae, and Phocidae), and Musteloidea, composed of Ailuridae (red  
358 pandas), Mephitidae (skunks), Procyonidae (raccoons), and Mustelidae (badgers, martens,  
359 weasels, and otters). Within Arctoidea, the ML phylogenetic inference on the concatenation  
360 provided support for grouping Pinnipedia and Musteloidea to the exclusion of Ursidae (bears)  
361 with maximum bootstrap support (**Fig. 7**), as in the mitogenomic tree (**Fig. 2a**). However, the  
362 concordance factor analyses revealed that many sites and many genes actually supported  
363 alternative topological conformations for this node characterized by a very short branch  
364 length (sCF=34.1, SDF1=29.2, sDF2=36.7, gCF=46.9, gDF1=18.6, gDF2=18.2, gDFP=16.3)  
365 (**Fig. 7**). In Pinnipedia, the clade Odobenidae (walruses) plus Otariidae (eared seals) was  
366 recovered to the exclusion of Phocidae (true seals), which was also in agreement with the  
367 mitogenomic scenario (**Fig. 2a**). Finally, within Musteloidea, Mephitidae represented the first  
368 offshoot, followed by Ailuridae, and a clade grouping Procyonidae and Mustelidae.  
369 Phylogenetic relationships within Musteloidea were incongruent with the mitogenomic tree,  
370 which alternatively supported the grouping of Ailuridae and Mephitidae (**Fig. 2a**).

371



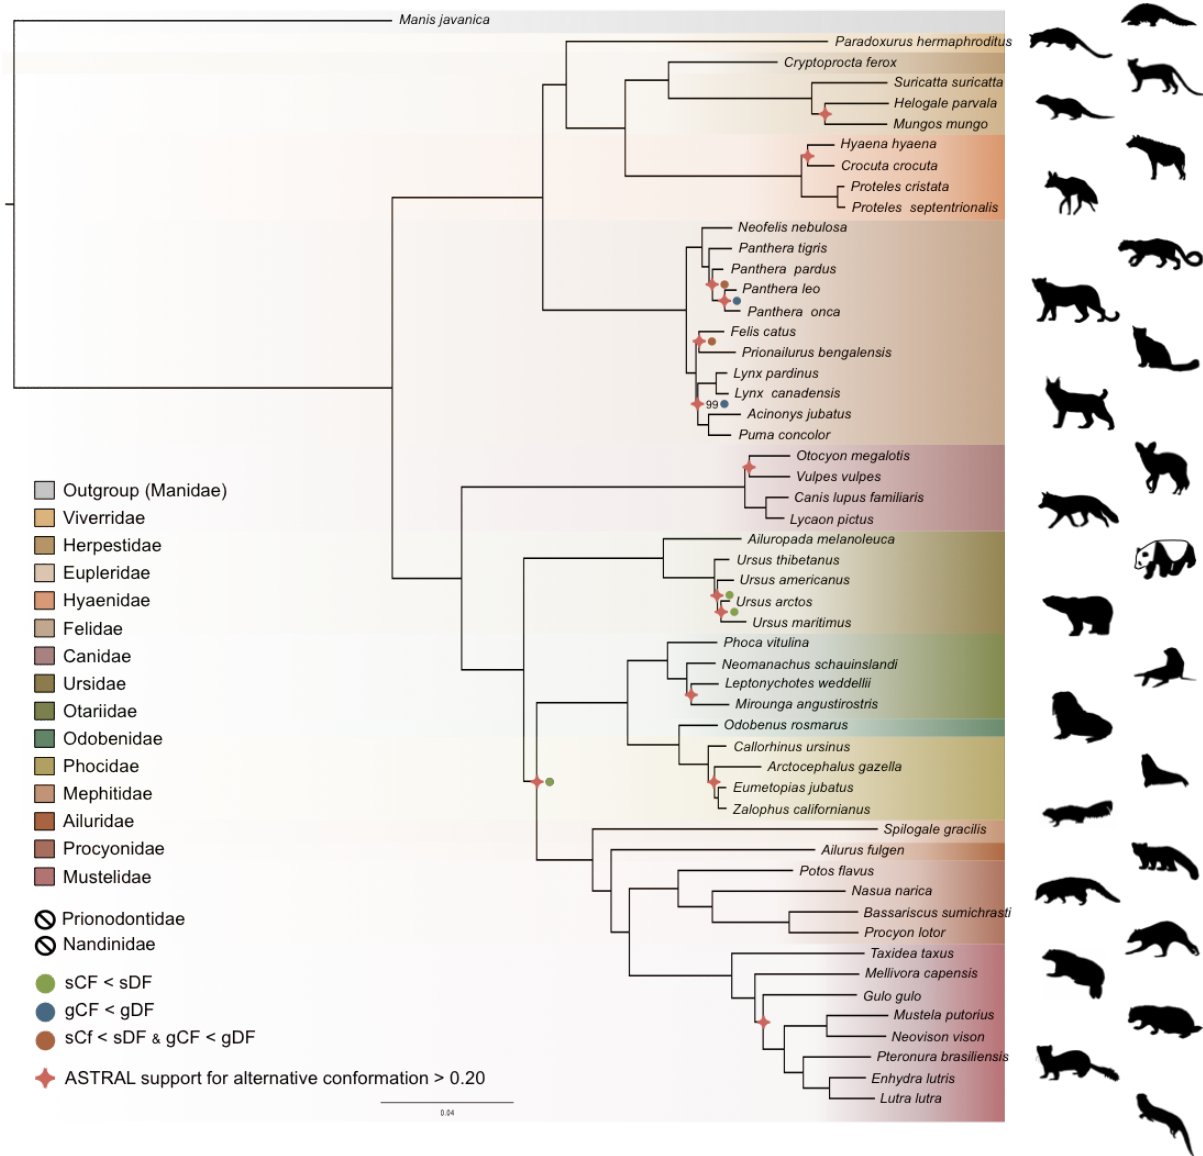

372

373 **Figure 7.** Phylogenomic tree reconstructed from the nucleotide supermatrix composed of 14,307 single-copy  
 374 orthologous genes for 52 species of Carnivora plus one outgroup (*Manis javanica*). The family names in the  
 375 legend are ordered as in the phylogeny.

376

## 377 Discussion

### 378 *High-quality mammalian genomes from roadkill using MaSuRCA hybrid assembly*

379 Long-read sequencing technologies and associated bioinformatic tools hold promise for  
 380 making chromosome-length genome assemblies the gold standard (Dudchenko et al., 2017;  
 381 Koepfli et al., 2015; Rice and Green, 2019). However, obtaining relatively large mammalian  
 382 genomes of high quality remains a challenging and costly task for researchers working

383 outside of large genome sequencing consortia (Li et al., 2010; Lindblad-Toh et al., 2011).  
384 Despite the accuracy of short-read sequencing technologies, the use of PCR amplification is  
385 needed to increase the depth of coverage, creating uneven genomic representation and  
386 leading to sequencing biases such as GC-rich regions being less well sequenced than AT-rich  
387 ones in classical Illumina libraries (Aird et al., 2011; Tilak et al., 2018). Moreover, the use of  
388 short reads involves difficulties in the assembly of repeated regions or transposable elements  
389 longer than the sequencing read length. The use of less GC-biased long reads of single DNA  
390 molecules and ultra-long reads spanning repeated genomic regions provides a powerful  
391 solution for obtaining assemblies with high contiguity and completeness, although long-read  
392 sequencing has limited accuracy (10-20% errors). Long reads can indeed be used alone at a  
393 high depth of coverage permitting autocorrection (Koren et al., 2017; Shafin et al., 2020) or  
394 in combination with short reads for (1) scaffolding short-read contigs (Armstrong et al., 2020;  
395 Kwan et al., 2019), (2) using short reads to polish long-read contigs (Batra et al., 2019b;  
396 Datema et al., 2016; Jansen et al., 2017; Michael et al., 2018), or (3) optimizing the assembly  
397 process by using information from both long and short reads (Díaz-Viraqué et al., 2019; Gan  
398 et al., 2019; Jiang et al., 2019; Kadobianskyi et al., 2019; Tan et al., 2018; Wang et al., 2020;  
399 Zimin et al., 2017). Given the previously demonstrated efficiency of the MaSuRCA tool for  
400 the assembly of large genomes (Scott et al., 2020; Wang et al., 2020; Zimin et al., 2017), we  
401 decided to rely on hybrid sequencing data combining the advantages of Illumina short-read  
402 and Nanopore long-read sequencing technologies.

403         With an increasing number of species being threatened worldwide, obtaining genomic  
404 resources from mammalian wildlife can be difficult. We decided to test the potential of using  
405 roadkill samples, a currently underexploited source material for genomics (Etherington et al.,  
406 2020; Maigret, 2019). Despite limited knowledge and difficulties associated with *de novo*  
407 assembly of non-model species (Etherington et al., 2020), we designed a protocol to produce

408 DNA extracts of suitable quality for Nanopore long-read sequencing from roadkill (Tilak et  
409 al., 2020). Additionally, we tested the impact of the accuracy of the MinION base calling step  
410 on the quality of the resulting MaSuRCA hybrid assemblies. In line with previous studies  
411 (Wenger et al., 2019; Wick et al., 2019), we found that using the *high accuracy* option rather  
412 than the *fast* option of Guppy 3.1.5 leads to more contiguous assemblies by increasing the  
413 N50 value. By relying on this protocol, we were able to generate two hybrid assemblies by  
414 combining Illumina reads at relatively high coverage (80x) and MinION long reads at  
415 relatively moderate coverage (12x) which provides genomes with high contiguity and  
416 completeness. These represent the first two mammalian genomes obtained with such a hybrid  
417 Illumina/Nanopore approach using the MaSuRCA assembler for non-model carnivoran  
418 species: the aardwolf (*P. cristata*) and the bat-eared fox (*O. megalotis*). Despite the use of  
419 roadkill samples, our assemblies compare favourably, in terms of both contiguity and  
420 completeness, with the best carnivoran genomes obtained so far from classical genome  
421 sequencing approaches that do not rely on complementary optical mapping or chromatin  
422 conformation approaches. Overall, our carnivoran hybrid assemblies are fairly comparable to  
423 those obtained using the classic Illumina-based genome sequencing protocol involving the  
424 sequencing of both paired-end and mate-paired libraries (Li et al., 2010). The benefit of  
425 adding Nanopore long reads is demonstrated by the fact that our hybrid assemblies are of  
426 better quality than all the draft genome assemblies generated using the DISCOVAR *de novo*  
427 protocol based on a PCR-free single Illumina 250 bp paired-end library (Weisenfeld et al.  
428 2014; DISCOVAR) used in the 200 Mammals Project of the Broad Genome Institute (The  
429 200 mammals project). These results confirm the capacity of the MaSuRCA hybrid assembler  
430 to produce quality assemblies for large and complex genomes by leveraging the power of  
431 long Nanopore reads (Wang et al., 2020). Moreover, these two hybrid assemblies could form  
432 the basis for future chromosome-length assemblies by adding complementary HiC data (van

433 Berkum et al., 2010) as proposed in initiatives such as the Vertebrate Genome Project  
434 (Koepfli et al., 2015) and DNAZoo (Dudchenko et al., 2017). Our results demonstrate the  
435 feasibility of producing high-quality mammalian genome assemblies at moderate cost using  
436 roadkill and should encourage genome sequencing of non-model mammalian species in  
437 ecology and evolution laboratories.

438

#### 439 ***Genomic evidence for two distinct species of aardwolves***

440 The mitogenomic distances inferred between the subspecies of *O. megalotis* and *P. cristata*  
441 were comparable to those observed for other well-defined species within Carnivora.  
442 Furthermore, by comparing the genetic diversity between several well-defined species  
443 (divergence) and several individuals of the same species (polymorphism) based on the COX1  
444 and CYTB genes across Carnivora, we were able to pinpoint a threshold of approximately  
445 0.02 substitutions per base separating divergence from polymorphism, which is in accordance  
446 with a recent study of naturally occurring hybrids in Carnivora (Allen et al., 2020). This  
447 method, also known as the barcoding gap method (Meyer and Paulay, 2005), allowed us to  
448 show that the two subspecies of *P. cristata* present a genetic divergence greater than the  
449 threshold, whereas the divergence is slightly lower for the two subspecies of *O. megalotis*.  
450 These results seem to indicate that the subspecies *P. c. septentrionalis* might have to be  
451 elevated to the species level (*P. septentrionalis*). Conversely, for *O. megalotis*, this first  
452 genetic indicator seems to confirm the distinction at the subspecies level. However,  
453 mitochondrial markers have some well-identified limitations (Galtier et al., 2009), and it is  
454 difficult to properly determine a threshold between polymorphism and divergence across  
455 Carnivora. The measure of mtDNA sequence distances can thus be seen only as a first useful  
456 indicator for species delineation. The examination of variation at multiple genomic loci in a

457 phylogenetic context, combined with morphological, behavioural and ecological data, is  
458 required to establish accurate species boundaries.

459         The newly generated reference genomes allowed us to perform genome-wide  
460 evaluation of the genetic differentiation between subspecies using short-read resequencing  
461 data of a few additional individuals of both species. Traditionally, the reduction in  
462 polymorphism in two subdivided populations (*p within*) compared to the population at large  
463 (*p between*) is measured with several individuals per population (FST; Hudson et al. 1992).  
464 However, given that the two alleles of one individual are the results of the combination of  
465 two *a priori* non-related individuals of the population (*i.e.*, the parents), with a large number  
466 of SNPs, the measurement of heterozygosity can be extended to estimation of the  
467 (sub)population polymorphism. Furthermore, in a panmictic population with recombination  
468 along the genome, different chromosomal regions can be considered to be independent and  
469 can be used as replicates for heterozygosity estimation. In this way, genome-wide analyses of  
470 heterozygosity provide a way to assess the level of polymorphism in a population and a way  
471 to compare genetic differentiation between two populations. If we hypothesize that the two  
472 compared populations are panmictic, picking one individual or another of the population has  
473 no effect (*i.e.*, there is no individual with excess homozygous alleles due to mating preference  
474 across the population), and the population structure can be assessed by comparing the  
475 heterozygosity of the individuals of each population compared to the heterozygosity observed  
476 for two individuals of the same population (see *Methods*). Such an index of genetic  
477 differentiation, by measuring the level of population structure, could provide support to  
478 establish accurate species boundaries. In fact, delineating species has been and still is a  
479 complex task in evolutionary biology (Galtier, 2019; Ravinet et al., 2016; Roux et al., 2016).  
480 Given that accurately defining the species taxonomic level is essential for a number of  
481 research fields, such as macroevolution (Faurby et al., 2016) or conservation (Frankham et

482 al., 2012), defining thresholds to discriminate between populations or subspecies in different  
483 species is an important challenge in biology. However, due to the disagreement on the  
484 definition of species, the different routes of speciation observed *in natura* and the different  
485 amount of data available among taxa, adapting a standardized procedure for species  
486 delineation seems complicated (Galtier, 2019).

487 As proposed by Galtier (Galtier, 2019), we decided to test the taxonomic level of the  
488 *P. cristata* and *O. megalotis* subspecies by comparing the genetic differentiation observed  
489 between Eastern and Southern populations within these species to the genetic differentiation  
490 measured for well-defined Carnivora species. Indeed, estimation of the genetic differentiation  
491 either within well-defined species (polymorphism) or between two closely related species  
492 (divergence) allowed us to define a threshold between genetic polymorphism and genetic  
493 divergence across Carnivora (**Fig. 5**). Given these estimates, and in accordance with  
494 mitochondrial data, the two subspecies of *P. cristata* (1) present more genetic differentiation  
495 between each other than the two well-defined species of golden jackal (*Canis aureus*) and  
496 wolf (*Canis lupus*), and (2) present more genetic differentiation than the more polymorphic  
497 species of the dataset, the lion (*P. leo*). Despite known cases of natural hybridization reported  
498 between *C. aureus* and *C. lupus* (Galov et al., 2015; Gopalakrishnan et al., 2018), the  
499 taxonomic rank of these two species is well accepted. In that sense, given the species used as  
500 a reference, the two subspecies of *P. cristata* seem to deserve to be elevated to the species  
501 level. The situation is less clear regarding the subspecies of *O. megalotis*. Indeed, while the  
502 genetic differentiation observed between the two subspecies is significantly higher than the  
503 polymorphic distances observed for all the well-defined species of the dataset, there is no  
504 species in our dataset that exhibits equivalent or lower genetic divergence than a closely  
505 related species. This illustrates the limits of delineating closely related species due to the  
506 continuous nature of the divergence process (De Queiroz, 2007). The subspecies of *O.*



507 *megalotis* fall into the “grey zone” of the speciation continuum (De Queiroz, 2007; Roux et  
508 al., 2016) and are likely undergoing speciation due to their vicariant distributions. To be  
509 congruent with the genetic divergence observed across closely related species of Carnivora  
510 (according to our dataset), we thus propose that (1) the taxonomic level of the *P. cristata*  
511 subspecies be reconsidered by elevating the two subspecies *P. c. cristata* and *P. c.*  
512 *septentrionalis* to the species level, and (2) the taxonomic level for the two subspecies of *O.*  
513 *megalotis* be maintained. These new taxonomic results should prompt a deeper investigation  
514 of morphological and behavioural differences that have been reported between the two  
515 proposed subspecies of aardwolf to formally validate our newly proposed taxonomic  
516 arrangement. They also have conservation implications, as the status of the two distinct  
517 aardwolf species will have to be re-evaluated separately in the International Union for  
518 Conservation of Nature (IUCN) Red List of Threatened Species (IUCN 2020, 2020).

519

#### 520 ***Population size variation and environmental change***

521 The Pairwise Sequentially Markovian Coalescent (PSMC) analyses revealed that the  
522 Southern and Eastern African populations have different effective population size estimates  
523 over time, confirming that they have been genetically isolated for several thousand years,  
524 which is more so for the aardwolf than for the bat-eared fox. This supports the hypothesis of  
525 two separate events leading to the same disjunct repartitions for the two taxa, in accordance  
526 with mitochondrial dating. Nevertheless, the population trends are rather similar and are  
527 characterized by continuous declines between 1 Mya and 100-200 kya that are followed by an  
528 increase that is much more pronounced in the Southern populations of both species between  
529 30-10 kya. The similar trajectories exhibited by both species suggest that they were under the  
530 influence of similar environmental factors, such as climate and vegetation variations.

531           Aardwolves and bat-eared foxes live in open environments including short-grass  
532 plains, shrubland, and open and tree savannahs, and both are highly dependent on  
533 herbivorous termites for their diet. Therefore, the fluctuation of their populations could reflect  
534 the evolution of these semi-arid ecosystems determining prey abundance during the last  
535 million years. However, the global long-term Plio-Pleistocene African climate is still debated.  
536 For Eastern Africa, some studies have suggested an evolution towards increased aridity  
537 (deMenocal, 2004, 1995) whereas others have proposed the opposite (Grant et al., 2017;  
538 Maslin et al., 2014; Trauth et al., 2009). Our data therefore support the latter hypothesis, as a  
539 global long-term tendency towards a wetter climate in East Africa could have been less  
540 favourable for species living in open environments.

541           Southern populations exhibit a similar decreasing trend between 1 Mya and 100 kya.  
542 Once again, the relevant records appear contradictory. This could be the result of regional  
543 variation across South Africa, with aridification in the Southwestern part and wetter  
544 conditions in the Southeast (Caley et al., 2018; Johnson et al., 2016). Finally, the 30-10 kya  
545 period appears to have been more humid (Chase et al., 2019; Chevalier and Chase, 2015; Lim  
546 et al., 2016). This seems inconsistent with the large population increase detected in Southern  
547 populations of both species; however, the large regions of the Namib Desert that are currently  
548 unsuitable could have been more favorable in wetter conditions.

549           The global decrease in population size detected in the Southern and Eastern  
550 populations could also reflect the fragmentation of a continuous ancestral range. The global  
551 trend towards a wetter climate may have favoured the development of the tropical rainforest  
552 in central Africa creating a belt of unsuitable habitat. This is in line with previous studies  
553 describing diverse biogeographical scenarios involving the survival and divergence of  
554 ungulate populations in isolated savannah refuges during Pleistocene climate oscillations  
555 (Lorenzen et al., 2012). In this respect, it could be interesting to study population trends in



556 other species living in semi-arid environments and having a similar range as disconnected  
557 populations. Interestingly, several bird species also have similar distributions including the  
558 Orange River francolin (*Scleroptila gutturalis*), the greater kestrel (*Falco rupicoloides*), the  
559 double-banded courser (*Smutsornis africanus*), the red-fronted tinkerbird (*Pogoniulus*  
560 *pusillus*), the cape crow (*Corvus capensis*) and the black-faced waxbill (*Estrilda*  
561 *erythronotos*), supporting the role of the environment in the appearance of these disjunct  
562 repartitions. Finally, these new demographic results showing recent population size declines  
563 in both regions in both species might be taken into account when assessing the conservation  
564 status of the two distinct aardwolf species and bat-eared fox subspecies.

565

### 566 ***Genome-scale phylogeny of Carnivora***

567 In this study, we provide a new phylogeny of Carnivora including the newly recognized  
568 species of aardwolf (*P. septentrionalis*). The resulting phylogeny is fully resolved with all  
569 nodes supported with UFBS values greater than 95% and is congruent with previous studies  
570 (Doronina et al., 2015; Eizirik et al., 2010) (**Fig. 5**). Across Carnivora, the monophyly of all  
571 superfamilies described are strongly supported (Flynn et al., 2010) and are divided into two  
572 distinct suborders: a cat-related clade (Feliformia) and a dog-related clade (Caniformia). On  
573 the one hand, within Feliformia, the different families and their relative relationships are well  
574 supported and are in accordance with previous studies (Eizirik et al., 2010). There is one  
575 interesting point regarding the Felidae family. While almost all the nodes of the phylogeny  
576 were recovered as strongly supported from the three phylogenetic inference analyses (ML  
577 inferences, concordance factor analyses and coalescent-based inferences), one third of the  
578 nodes (3 out of 9) within Felidae show controversial node supports. This result is not  
579 surprising and is consistent with previous studies arguing for ancient hybridization among  
580 Felidae (Li et al., 2016). Another interesting point regarding Feliformia and particularly

581 Hyaenidae is the relationship of the two aardwolves. The two species, *P. cristata* and *P.*  
582 *septentrionalis* form a sister clade to the clade composed of the striped hyena (*H. hyaena*) and  
583 the spotted hyena (*C. crocuta*), in accordance with previous studies (Koepfli et al., 2006;  
584 Westbury et al., 2018) and the two subfamilies Protelinae and Hyaeninae that have been  
585 proposed for these two clades, respectively. However, although the phylogenetic inferences  
586 based on the supermatrix of 14,307 single-copy orthologues led to a robust resolution of this  
587 node according to the bootstrap supports, both concordance factors and coalescent-based  
588 analyses revealed conflicting signals with support for alternative topologies. In this sense, the  
589 description and acceptance of the Hyaninae and Protelinae families still require further  
590 analyses, and including genomic data for the brown hyena (*Parahyena brunnea*) seems  
591 essential (Westbury et al., 2018).

592 On the other hand, within Caniformia, the first split separates Canidae from the  
593 Arctoidea. Within Canidae, the bat-eared fox (*O. megalotis*) is grouped with the red fox  
594 (*Vulpes vulpes*), the other representative of the tribe Vulpini, but with a very short branch  
595 and concordance analyses indicating conflicting signals on this node. Regarding Arctoidea,  
596 historically, the relationships between the three superfamilies of arctoids have been  
597 contradictory and debated. The least supported scenario from the literature is that in which  
598 the clade Ursoidea/Musteloidea is a sister group of Pinnipedia (Flynn and Nedbal, 1998).  
599 Based on different types of phylogenetic characters, previous studies found support for both  
600 the clade Ursoidea/Pinnipedia (Agnarsson et al., 2010; Meredith et al., 2011; Rybczynski et  
601 al., 2009) and the clade Pinnipedia/Musteloidea (Arnason et al., 2007; Eizirik et al., 2010;  
602 Flynn et al., 2005; Sato et al., 2009, 2006; Schröder et al., 2009). However, investigations of  
603 the insertion patterns of retroposed elements revealed the occurrence of incomplete lineage  
604 sorting (ILS) at this node (Doronina et al., 2015). With a phylogeny inferred from 14,307  
605 single-copy orthologous genes, our study, based on both gene trees and supermatrix

606 approaches, gives support to the variant Pinnipedia/Musteloidea excluding Ursoidea as the  
607 best supported conformation for the Arctoidea tree (Doronina et al., 2015; Eizirik et al., 2010;  
608 Sato et al., 2006). Interestingly, in agreement with Doronina et al. (Doronina et al., 2015), our  
609 concordance factor analysis supports the idea that the different conformations of the  
610 Arctoidea tree are probably due to incomplete sorting of the lineage by finding almost the  
611 same number of sites supporting each of the three conformations (34.11%, 29.61% and  
612 36.73%). However, although trifurcation of this node is supported by these proportions of  
613 sites, a majority of genes taken independently (gene concordance factors: 6,624 out of 14,307  
614 genes) and the coalescent-based species tree approach (quartet posterior probabilities  $q_1 =$   
615  $0.53$ ,  $q_2 = 0.24$ ,  $q_3 = 0.24$ ) support the clade Pinnipedia/Musteloidea excluding Ursoidea.  
616 Considering these results, the difficulty of resolving this trifurcation among Carnivora  
617 (Delisle and Strobeck, 2005) has likely been contradictory due to the ILS observed among  
618 these three subfamilies (Doronina et al., 2015), which led to different phylogenetic scenarios  
619 depending on the methods (Peng et al., 2007) or markers (L and YP, 2006) used. Another  
620 controversial point, likely due to incomplete lineage sorting (Doronina et al., 2015) within the  
621 Carnivora phylogeny, is the question regarding which of Ailuridae and Mephitidae is the  
622 most basal family of the Musteloidea (Doronina et al., 2015; Eizirik et al., 2010; Flynn et al.,  
623 2005; Sato et al., 2009). Interestingly, our phylogenetic reconstruction based on mitogenomic  
624 data recovered the clade Ailuridae/Mephitidae as a sister clade of all other Musteloidea  
625 families. The phylogenomic inferences based on the genome-scale supermatrix recovered the  
626 Mephitidae family as the most basal family of Musteloidea. This result is supported by both  
627 coalescent-based inferences and concordance factors. In that sense, despite incomplete  
628 lineage sorting (Doronina et al., 2015), at the genomic level, it seems that the Mephitidae  
629 family would be the most basal family of Musteloidea.

630 Overall, the phylogenomic inference based on 14,307 single-copy orthologous genes  
631 provides a new vision of the evolution of Carnivora. The addition of information from both  
632 concordance factor analyses (Minh et al., 2020) and coalescent-based inference (Zhang et al.,  
633 2018) supports previous analyses showing controversial nodes in the Carnivora phylogeny.  
634 Indeed, this additional information seems essential in phylogenomic analyses based on  
635 thousands of markers, which can lead to highly resolved and well-supported phylogenies  
636 despite support for alternative topological conformations for controversial nodes (Allio et al.,  
637 2020b; Jeffroy et al., 2006; Kumar et al., 2012).

638

## 639 **Conclusions**

640 The protocol developed here to extract the best part of the DNA from roadkill samples  
641 provides a good way to obtain genomic data from wildlife. Combining Illumina sequencing  
642 data and Oxford Nanopore long-read sequencing data using the MaSuRCA hybrid assembler  
643 allowed us to generate high-quality reference genomes for the Southern aardwolf (*P. cristata*)  
644 and the Southern bat-eared fox (*O. megalotis megalotis*). This cost-effective strategy provides  
645 opportunities for large-scale population genomic studies of mammalian wildlife using  
646 resequencing of samples collected from roadkill. Indeed, by defining a genetic differentiation  
647 index based on only three individuals, we illustrate the potential of the approach for genome-  
648 scale species delineation in both species for which subspecies have been defined based on  
649 disjunct distributions and morphological differences. Our results, based on both  
650 mitochondrial and nuclear genome analyses, indicate that the two subspecies of *P. cristata*  
651 warrant elevation to the species taxonomic level; the *O. megalotis* subspecies do not warrant  
652 this status, but are likely ongoing species. Hence, by generating reference genomes with high  
653 contiguity and completeness, this study shows a concrete application for genomics of roadkill  
654 samples.

655

## 656 **Methods**

### 657 **Biological samples**

658 We conducted fieldwork in the Free State province of South Africa in October 2016 and  
659 October 2018. While driving along the roads, we opportunistically collected tissue samples  
660 from four roadkill specimens from which we sampled ear necropsies preserved in 95%  
661 Ethanol: two bat-eared foxes (*O. megalotis* NMB TS305, GPS: 29°1'52"S, 25°9'38"E and  
662 NMB TS306, GPS: 29°2'33"S, 25°10'26"E), and two aardwolves (*P. cristata* NMB TS307,  
663 GPS: 29°48'45"S, 26°15'0"E and NMB TS491, GPS: 29°8'42"S, 25°39'4"E). As aardwolf  
664 specimen NMB TS307 was still very fresh, we also sampled muscle and salivary gland  
665 necropsies preserved in RNAlater™ stabilization solution (Thermo Fisher Scientific). These  
666 roadkill specimens have been sampled under standing collecting permit number S03016  
667 issued by the Department of National Affairs in Pretoria (South Africa) granted to the  
668 National Museum, Bloemfontein. These samples have been sent to France under export  
669 permits (JM 3007/2017 and JM 5043/2018) issued by the Free State Department of  
670 Economic, Small Business Development, Tourism and Environmental Affairs (DESTEA) in  
671 Bloemfontein (Free State, South Africa) and import permits issued by the Direction régionale  
672 de l'environnement, de l'aménagement et du logement (DREAL) Occitanie in Toulouse  
673 (France). All tissue samples collected in this study have been deposited in the mammalian  
674 tissue collection of the National Museum, Bloemfontein (Free State, South Africa).

675

### 676 **Mitochondrial barcoding and phylogenetics**

#### 677 *Mitogenomic dataset construction*

678 In order to assemble a mitogenomic data set for assessing mitochondrial diversity among *P.*  
679 *cristata* and *O. megalotis* subspecies, we generated seven new Carnivora mitogenomes using

680 Illumina shotgun sequencing (**Table S6**). Briefly, we extracted total genomic DNA total  
681 using the DNeasy Blood and Tissue Kit (Qiagen) for *P. c. cristata* (NMB TS307), *P. c.*  
682 *septentrionalis* (NMS Z.2018.54), *O. m. megalotis* (NMB TS305), *O. m. virgatus* (FMNH  
683 158128), *Speothos venaticus* (ISEM T1624), *Vulpes vulpes* (ISEM T3611), and *Parahyaena*  
684 *brunnea* (ISEM FD126), prepared Illumina libraries following the protocol of Tilak et al.  
685 (Tilak et al., 2015), and sent libraries to the Montpellier GenomiX platform for single-end  
686 100 bp sequencing on a Illumina HiSeq 2500 instrument to obtain about 5 to 10 million reads  
687 per sample. We then assembled and annotated mitogenomes from these single-read shotgun  
688 sequencing data with MitoFinder v1.0.2 (Allio et al., 2020a) using default parameters. We  
689 also used MitoFinder to extract three additional mitogenomes from paired-end Illumina  
690 capture libraries of ultra-conserved elements (UCEs) and available from the Short Read  
691 Archive (SRA) of NCBI for *Viverra zangalunga*, *Bdeogale nigripes*, and *Fossa fossana*  
692 Additional read mappings were done with Geneious (Kearse et al., 2012) to close gaps when  
693 the mitochondrial genome was fragmented. Finally, we downloaded all RefSeq carnivoran  
694 mitogenomes available in Genbank (135 species as of July 1<sup>st</sup>, 2019) and the mitogenome of  
695 the Malayan pangolin (*Manis javanica*) to use as outgroup.

#### 696 *Mitogenomic phylogenetics and dating*

697 Mitochondrial protein coding genes were individually aligned using MACSE v2 (Ranwez et  
698 al., 2018) with default parameters, and ribosomal RNA genes using MAFFT (Katoh and  
699 Standley, 2013) algorithm FFT-NS-2 with option *--adjustdirection*. A nucleotide supermatrix  
700 was created by concatenating protein-coding and ribosomal RNA genes for the 142 taxa (140  
701 species and 2 subspecies). Phylogenetic inferences were performed with Maximum  
702 likelihood (ML) as implemented in IQ-TREE 1.6.8 (Nguyen et al., 2014) with the  
703 GTR+G4+F model. Using the resulting topology, divergence time estimation was performed  
704 using Phylobayes v4.1c (Lartillot et al., 2013) with strict clock (CL), autocorrelated (LN or

705 TK02), and uncorrelated (UGAM or UCLM) models combined with 18 fossil calibrations  
706 (**Table S7**). Three independent Markov chains Monte Carlo (MCMC) analyses starting from  
707 a random tree were run until 10,000 generated cycles with trees and associated model  
708 parameters sampled every cycle. A burn-in of 25% was applied before constructing the  
709 majority-rule Bayesian consensus tree with the *readdiv subprogram*. Finally, to determine the  
710 best-fitting clock model, cross-validation analyses were performed with Phylobayes by  
711 splitting the dataset randomly into two parts. Then, parameters of one model were estimated  
712 on the first part of the dataset (here representing 90%) and the parameter values were used to  
713 compute the likelihood of the second part of the dataset (10%). This procedure was repeated  
714 ten times for each model. Finally, the likelihood of each repeated test was computed and  
715 summed for each model with the *readcv* and *sumcv* subprograms, respectively. The molecular  
716 clock model with the highest cross-likelihood scores was considered as the best fitting.

#### 717 *Mitochondrial diversity and barcoding gap analyses*

718 To check if a threshold between intraspecific variation and interspecific divergence could be  
719 determined across Carnivora (Meyer and Paulay, 2005), two mitochondrial barcoding  
720 datasets were assembled from all COX1 and CYTB sequences available for Carnivora plus  
721 the corresponding sequences for the two subspecies of *O. megalotis* and *P. cristata*,  
722 respectively. After aligning each barcoding dataset with MACSE v2, ML phylogenetic  
723 inferences were performed with IQ-TREE 1.6.6 using the optimal substitution model as  
724 determined by ModelFinder (Kalyaanamoorthy et al., 2017). Then, pairwise patristic  
725 distances between all individuals were calculated from the resulting ML phylogram. Finally,  
726 based on the actual taxonomic assignment, patristic distances were considered as intraspecific  
727 variation between two individuals belonging to the same species and as interspecific  
728 divergence between individuals of different species.

729



## 730 **Short reads and long reads hybrid assembly of reference genomes**

### 731 *Sampling*

732 To construct reference assemblies with high contiguity for the two focal species we selected  
733 the best-preserved roadkill samples: NMB TS305 for *O. megalotis* and NMB TS307 for *P.*  
734 *cristata* (Table 1). Total genomic DNA extractions were performed separately for Illumina  
735 short-read sequencing and MinION long-read sequencing.

### 736 *Illumina short-read sequencing*

737 Total genomic DNA extractions were performed from ear necropsies for the two sampled  
738 individuals using the DNeasy Blood and Tissue Kit (Qiagen) following manufacturer's  
739 instructions. A total amount of 1.0µg DNA per sample was sent as input material for Illumina  
740 library preparation and sequencing to Novogene Europe (Cambridge, UK). Sequencing  
741 libraries were generated using NEBNext® DNA Library Prep Kit following manufacturer's  
742 recommendations and indices were added to each sample. Genomic DNA was randomly  
743 fragmented to a size of 350bp by shearing, then DNA fragments were end-polished, A-tailed,  
744 and ligated with the NEBNext adapter for Illumina sequencing, and further PCR enriched by  
745 P5 and indexed P7 oligos. The PCR products were purified (AMPure XP system) and the  
746 resulting libraries were analysed for size distribution by Agilent 2100 Bioanalyzer and  
747 quantified using real-time PCR. Since the genome sizes for these two species was estimated  
748 to be about 2.5 Gb, Illumina paired-end 250 bp sequencing was run on HiSeqX10 and  
749 NovaSeq instruments to obtain about 200 Gb per sample corresponding to a genome depth of  
750 coverage of about 80x.

751

### 752 *MinION long-read sequencing*

753 Considering the DNA quality required to perform sequencing with Oxford Nanopore  
754 Technologies (ONT), a specific protocol to extract DNA from roadkill was designed (Tilak et



755 al., 2020). First, genomic DNA was extracted by using the classical Phenol-chloroform  
756 method. Then, we evaluated the cleanliness of the extractions by using (1) a binocular  
757 magnifying glass to check the absence of suspended particles (e.g. hairpieces), and (2) both  
758 Nanodrop and Qubit/Nanodrop ratio. To select the longest DNA fragments, we applied a  
759 specific ratio of 0.4x of AMPure beads applied (Tilak et al., 2020). Extracted-DNA size was  
760 then homogenized using covaris G-tubes. Finally, long-read ONT sequencing was performed  
761 through MinION flowcells (FLO-MIN-106) using libraries prepared with the ONT Ligation  
762 Sequencing kit SQK-LSK109. For both species, we run MinION sequencing until about 30  
763 Gb per sample were obtained to reach a genome depth of coverage of about 12x.

#### 764 *Hybrid assembly of short and long reads*

765 Short reads were cleaned using Trimmomatic 0.33 (Bolger et al., 2014) by removing low  
766 quality bases from their beginning (LEADING:3) and end (TRAILING:3), by removing reads  
767 shorter than 50 bp (MINLEN:50). Quality was measured for sliding windows of four base  
768 pairs and had to be greater than 15 on average (SLIDINGWINDOW:4:15). For MinION  
769 sequencing, base calling of fast5 files were performed using Guppy v3.1.5 (developed by  
770 ONT) with the *high accuracy* option, which is longer but more accurate than the standard *fast*  
771 model (**Fig. S1**). Long read adapters were removed using Porechop v0.2.3  
772 (<https://github.com/rrwick/Porechop>). To take advantage of both the high accuracy of  
773 Illumina short reads sequencing and the size of MinION long reads, assemblies were  
774 performed using the MaSuRCA hybrid genome assembler (Zimin et al., 2013). This method  
775 transforms large numbers of paired-end reads into a much smaller number of longer ‘super-  
776 reads’ and permits assembling Illumina reads of differing lengths together with longer ONT  
777 reads. To illustrate the advantage of using short reads and long reads conjointly, assemblies  
778 were also performed with short reads only using SOAP-denovo (Luo et al., 2012) (kmer  
779 size=31, default parameters) and gaps between contigs were closed using the abundant paired

780 relationships of short reads with GapCloser 1.12 (Luo et al., 2012). To evaluate genome  
781 quality, traditional measures like the number of contigs, the N50, the mean and maximum  
782 length were evaluated for 503 mammalian genome assemblies retrieved from NCBI  
783 (<https://www.ncbi.nlm.nih.gov/assembly>) on August 13th, 2019 with filters: “Exclude  
784 derived from surveillance project”, “Exclude anomalous”, “Exclude partial”, and using only  
785 the RefSeq assembly for *Homo sapiens*. Finally, we assessed the gene completeness of our  
786 assemblies by comparison with the 63 carnivoran assemblies available at NCBI on August  
787 13th, 2019 using Benchmarking Universal Single-Copy Orthologs (BUSCO) v3 (Waterhouse  
788 et al., 2018) with the Mammalia OrthoDB 9 BUSCO gene set (Zdobnov et al., 2017) through  
789 the gVolante web server (Nishimura et al., 2017).

790

## 791 **Species delimitation based on genomic data**

### 792 *Sampling and resequencing*

793 To assess the genetic diversity in *P. cristata*, we sampled an additional roadkill individual of  
794 the South African subspecies *P. c. cristata* (NMB TS491) and an individual of the East  
795 African subspecies *P. c. septentrionalis* (NMS Z.2018.54) from Tanzania (**Table 1; Table**  
796 **S6**). A similar sampling was done for *O. megalotis*, with an additional roadkill individual of  
797 the South African subspecies *O. m. megalotis* (NMB TS306) and an individual of the East  
798 African subspecies *O. m. virgatus* (FMNH 158128) from Tanzania (**Table 1; Table S6**).  
799 DNA extractions were performed with the DNeasy Blood and Tissue Kit (Qiagen), following  
800 manufacturer’s instructions and a total amount of 1.0µg DNA per sample was outsourced to  
801 Novogene Europe (Cambridge, UK) for Illumina library preparation and Illumina paired-end  
802 250 bp sequencing on HiSeqX10 and NovaSeq instruments to obtain about 200 Gb per  
803 sample (genome depth of coverage of about 80x). The resulting reads were cleaned using  
804 Trimmomatic 0.33 with the same parameters as described above.

805 *Heterozygosity and genetic differentiation estimation*

806 In a panmictic population, alleles observed in one individual are shared randomly with other  
807 individuals of the same population and the frequencies of homozygous and heterozygous  
808 alleles should follow Hardy-Weinberg expectations. However, a structuration in  
809 subpopulations leads to a deficiency of heterozygotes (relative to Hardy-Weinberg  
810 expectations) in these subpopulations due to inbreeding (Holsinger and Weir, 2009;  
811 Walhund, 2010) and thus decreases the polymorphism within the inbred subpopulations with  
812 respect to the polymorphism of the global population. Given that, Hudson et al. (Hudson et  
813 al., 1992) defined the  $F_{ST}$  as a measure of polymorphism reduction in two subdivided  
814 populations ( $p$  within) compared to the population at large ( $p$  between).

815 To assess the  $p$  within and  $p$  between of the two subspecies of each species (*P.*  
816 *cristata* and *O. megalotis*), we compared the heterozygous alleles (SNPs) of two individuals  
817 of the same subspecies and the SNPs of two individuals of different subspecies by computing  
818 a  $F_{ST}$ -like statistic (hereafter called Genetic Differentiation Index: GDI) (Fig. S2). In fact,  
819 polymorphic sites can be discriminated in four categories: (1) fixed in one individual (e.g.  
820 AA/TT); (2) shared with both individuals (e.g. AT/AT); (3) specific to individual 1 (e.g.  
821 AT/AA); and (4) specific to individual 2 (e.g. AA/AT). Using these four categories, it is  
822 possible to estimate the polymorphism of each individual 1 and 2 and thus estimate a GDI  
823 between two individuals of the same population A and the GDI between two individuals of  
824 different populations A and B as follows:

825

826 
$$GDI\ intra\ A = 1 - \frac{(\pi_{A1} + \pi_{A2}) / \pi_{A2}}{\pi\ tot\ A} \quad \text{and} \quad GDI\ intra\ B = 1 - \frac{(\pi_{B1} + \pi_{B2}) / \pi_{B2}}{\pi\ tot\ B}$$

827

828 For each species, cleaned short reads of all individuals (the one used to construct the  
829 reference genome and the two resequenced from each population) were aligned with their

830 reference genome using BWA-MEM (Li, 2013). BAM files were created and merged using  
831 SAMtools (Li et al., 2009). Likely contaminant contigs identified using BlobTools (Laetsch  
832 and Blaxter, 2017) (**Fig. S3, Tables S8-S9**) and contigs belonging to the X chromosome  
833 following BLASTN annotation (-perc\_identity 80%, -evalue 10e-20) were removed. Then,  
834 100 regions of 100,000 bp were randomly sampled among contigs longer than 100,000 bp  
835 and 10 replicates of this sampling were performed (*i.e.* 10 x 100 x 100,000 bp = 100 Mb) to  
836 assess statistical variance in the estimates. Genotyping of these regions was performed with  
837 freebayes v1.3.1-16 (git commit id: g85d7bfc) (Garrison and Marth, 2012) using the parallel  
838 mode (Tange, 2011). Only SNPs with freebayes-estimated quality higher than 10 were  
839 considered for further analyses. A first GDI estimation comparing the average of the private  
840 polymorphisms of the two southern individuals (*p within A*) and the total polymorphism of  
841 the two individuals (*p between A*) was estimated to control that no genetic structure was  
842 observed in the Southern subspecies. Then a global GDI comparing the private  
843 polymorphisms of individuals from the two populations (*p within AB*) and the total  
844 polymorphism of the species (the two populations, *p between AB*) was estimated with one  
845 individual from each population (**Fig. S2**). Finally, the two GDI were compared to check if  
846 the Southern populations were more structured than the entire populations.

847 To contextualize these results, the same GDI measures were estimated for well-  
848 defined species of Carnivora. The species pairs used to make the comparison and thus help  
849 gauging the taxonomic status of the bat-eared fox and aardwolf subspecies were selected  
850 according to the following criteria: (1) the two species had to be as close as possible, (2) they  
851 had both reference genomes and short reads available, (3) their estimated coverage for the  
852 two species had to be greater than 20x, and (4) short read sequencing data had to be available  
853 for two individuals for one species of the pair. Given that, four species pairs were selected:  
854 (1) *Canis lupus* / *Canis aureus* (SRR8926747, SRR8926748, SRR7976426; vonHoldt et al.

855 2016); (2) *Ursus maritimus* / *Ursus arctos* (PB43: SRR942203, SRR942290, SRR942298;  
856 PB28: SRR942211, SRR942287, SRR942295; Brown Bear: SRR935591, SRR935625,  
857 SRR935627; Liu et al. 2014); (3) *Lynx pardinus* / *Lynx lynx* (*Lynx pardinus* LYNX11 :  
858 ERR1255591-ERR1255594; *Lynx lynx* LYNX8: ERR1255579-ERR1255582; *Lynx lynx*  
859 LYNX23: ERR1255540-ERR1255549; Abascal et al. 2016); and (4) *Panthera leo* / *Panthera*  
860 *pardus* (SRR10009886, SRR836361, SRR3041424; Kim et al. 2016). The exact same GDI  
861 estimation protocol was applied to each species pair.

862

### 863 **Demographic analyses**

864 Historical demographic variations in effective population size were estimated using the  
865 Pairwise Sequentially Markovian Coalescent (PSMC) model implemented in the software  
866 PSMC (<https://github.com/lh3/psmc>) (Li and Durbin, 2011). As described above, cleaned  
867 short reads were mapped against the corresponding reference genome using BWA-MEM (Li,  
868 2013) and genotyping was performed using Freebayes v1.3.1-16 (git commit id: g85d7bfc)  
869 (Garrison and Marth, 2012) for the three individuals of each species. VCF files were  
870 converted to fasta format using a custom python script, excluding positions with quality  
871 below 20 and a depth of coverage below 10x or higher than 200x. Diploid sequences in fasta  
872 format were converted into PSMC fasta format using a C++ program written using the  
873 BIO++ library (Guéguen et al., 2013) with a block length of 100bp and excluding blocks  
874 containing more than 20% missing data as implemented in “fq2psmcfa”  
875 (<https://github.com/lh3/psmc>).

876 PSMC analyses were run for all other populations testing several -t and -p parameters  
877 including -p "4+30\*2+4+6+10" (Nadachowska-Brzyska et al., 2013) and -p "4+25\*2+4+6"  
878 (Kim et al., 2016) but also -p "4+10\*3+4", -p "4+20\*2+4" and -p "4+20\*3+4". Overall, the  
879 tendencies were similar but some parameters led to unrealistic differences between the two

880 individuals from the South African population of *Otocyon megalotis*. We chose to present the  
881 results obtained using the parameters -t15 -r4 -p "4+10\*3+4". For this parameter setting, the  
882 variance in ancestral effective population size was estimated by bootstrapping the scaffolds  
883 100 times. To scale PSMC results, based on several previous studies on large mammals, a  
884 mutation rate of  $10^{-8}$  mutation/site/generation (Ekblom et al., 2018; Gopalakrishnan et al.,  
885 2017) and a generation time of two years (Clark, 2005; Koehler and Richardson, 1990; van  
886 Jaarsveld, 1993) were selected. Results were plotted in R v3.63 (Team, 2020) using the  
887 function “psmc.results” (<https://doi.org/10.5061/dryad.0618v/4>) (Liu and Hansen, 2017)  
888 modified using ggplot2 (Wickham, 2016) and cowplot (Wilke, 2016).

889

### 890 **Phylogenomic inferences**

891 To infer the Carnivora phylogenetic relationships, all carnivoran genomes available on  
892 Genbank, the DNAZoo website (<https://www.dnazoo.org>), and the OrthoMaM database  
893 (Scornavacca et al., 2019) as of February 11th, 2020 were downloaded (**Table S10**). In cases  
894 where more than one genome was available per species, the assembly with the best BUSCO  
895 scores was selected. Then, we annotated our two reference genome assemblies and the other  
896 unannotated assemblies using MAKER2 (Holt and Yandell, 2011) following the  
897 recommendations of the DNAZoo ([https://www.dnazoo.org/post/the-first-million-genes-are-  
898 the-hardest-to-make-r](https://www.dnazoo.org/post/the-first-million-genes-are-the-hardest-to-make-r)). In the absence of available transcriptomic data, this method allowed  
899 to leverage the power of homology combined with the thorough knowledge accumulated on  
900 the gene content of mammalian genomes. As advised, a mammal-specific subset of  
901 UniProtKB/Swiss-Prot, a manually annotated, non-redundant protein sequence database, was  
902 used as a reference for this annotation step (Boutet et al., 2016). Finally, the annotated coding  
903 sequences (CDSs) recovered for the Southern aardwolf (*P. c. cristata*) were used to

904 assembled those of the Eastern aardwolf (*P. c. septentrionalis*) by mapping the resequenced  
905 Illumina reads using BWA-MEM (Li, 2013).

906 Orthologous genes were extracted following the orthology delineation process of the  
907 OrthoMaM database (OMM) (Scornavacca et al., 2019). First, for each orthologous gene  
908 alignment of OMM, a HMM profile was created via hmmbuild using default parameters of  
909 the HMMER toolkit (Eddy, 2011) and all HMM profiles were concatenated and summarized  
910 using hmmpress to construct a HMM database. Then, for each CDS newly annotated by  
911 MAKER, hmmscan was used on the HMM database to retrieve the best hits among the  
912 orthologous gene alignments. For each orthologous gene alignment, the most similar  
913 sequences for each species were detected via *hmmsearch*. Outputs from *hmmsearch* and  
914 *hmmscan* were discarded if the first hit score was not substantially better than the second ( $hit_2$   
915  $< 0.9 hit_1$ ). This ensures our orthology predictions for the newly annotated CDSs to be robust.  
916 Then, the cleaning procedure of the OrthoMaM database was applied to the set of  
917 orthologous genes obtained. This process, implemented in a singularity image (Kurtzer et al.,  
918 2017) named *OMM\_MACSE.sif* (Ranwez et al., 2020) is composed of several steps including  
919 nucleotide sequence alignment at the amino acid level with MAFFT (Katoh and Standley,  
920 2013), refining alignments to handle frameshifts with MACSE v2 (Ranwez et al., 2018),  
921 cleaning of non homologous sequences, and masking of erroneous/dubious part of gene  
922 sequences with HMMcleaner (Di Franco et al., 2019). Finally, the last step of the cleaning  
923 process was to remove sequences that generated abnormally long branches during gene tree  
924 inferences. This was done by reconstructing gene trees using IQ-TREE v1.6.8 (Nguyen et al.,  
925 2014) with the MFP option to select the best fitting model for each gene. Then, the sequences  
926 generating abnormally long branches were identified and removed by *Phylter*  
927 (<https://github.com/damiendevienne/phylter>). This software allows detecting and removing



928 outliers in phylogenomic datasets by iteratively removing taxa in genes and optimizing a  
929 concordance score between individual distance matrices.

930         Phylogenomic analyses were performed using maximum likelihood (ML) using IQ-  
931 TREE 1.6.8 (Nguyen et al., 2014) on the supermatrix resulting from the concatenation of all  
932 orthologous genes previously recovered with the TESTNEW option to select the best fitting  
933 model for each partition. Two partitions per gene were defined to separate the first two codon  
934 positions from the third codon positions. Node supports were estimated with 100 non-  
935 parametric bootstrap replicates. Furthermore, gene concordant (gCF) and site concordant  
936 (sCF) factors were measured to complement traditional bootstrap node-support measures as  
937 recommended in Minh et al. (Minh et al., 2020). For each orthologous gene alignment a gene  
938 tree was inferred using IQ-TREE with a model selection and gCF and sCF were calculated  
939 using the specific option -scf and -gcf in IQ-TREE (Minh et al., 2020). The gene trees  
940 obtained with this analysis were also used to perform a coalescent-based species tree  
941 inference using ASTRAL-III (Zhang et al., 2018).

942

### 943 **Data access**

944 Genome assemblies, associated SRA data and mitogenomes have been submitted to genbank  
945 and will be available after publication (XXXXXX-XXXXXX). The full analytical pipeline,  
946 phylogenetic datasets (mitogenomic and genomic), corresponding trees and other  
947 supplementary materials will be available from zenodo.org  
948 (DOI:XX.XXXX/zenodo.XXXXXXX).

### 949 **Disclosure declaration**

950 The authors declare that they have no competing interests.

## 951 **Funding**

952 This work was supported by grants from the European Research Council (ERC-2015-CoG-  
953 683257 ConvergeAnt project), Investissements d'Avenir of the Agence Nationale de la  
954 Recherche (CEMEB: ANR-10-LABX-0004; ReNaBi-IFB: ANR-11-INBS-0013; MGX:  
955 ANR-10-INBS-09).

## 956 **Acknowledgements**

957 We would like to thank Rachid Koual and Amandine Magdeleine for technical help with  
958 DNA extractions and library preparations, Aude Caizergues and Nathalie Delsuc for fieldwork  
959 assistance, Christian Fontaine, Jean-Christophe Vié (Faune Sauvage, French Guiana), Corine  
960 Esser (Fauverie du Mont Faron, Toulon, France), François Catzeflis (ISEM Mammalian  
961 Tissue Collection), Adam Ferguson and Bruce Patterson (Field Museum of Natural History,  
962 Chicago, USA), Lily Crowley (Hamerton Zoo Park, UK), and Andrew Kitchener (National  
963 Museum of Scotland, Edinburgh, UK) for access to tissue samples. We also acknowledge  
964 Pierre-Alexandre Gagnaire for helpful discussion on genetic differentiation index and Brian  
965 Chase for providing references on African paleoclimate. We thank the Montpellier GenomiX  
966 Platform (MGX) part of the France Génomique National Infrastructure for sequencing data  
967 generation. Computational analyses benefited from the Montpellier Bioinformatics  
968 Biodiversity platform. We are also grateful to the Institut Français de Bioinformatique and  
969 the Roscoff Bioinformatics platform ABiMS (<http://abims.sb-roscoff.fr>) for providing help  
970 for computing and storage resources. This is contribution ISEM 2020-XXX-SUD of the  
971 Institut des Sciences de l'Evolution de Montpellier.

## 972 **Authors' contributions**

973 RA, BN and FD conceived the ideas and designed methodology, analysed the data, and led  
974 the writing of the manuscript; FD, NLA and RA performed fieldwork sampling; MK, RA and  
975 FD developed the protocol and performed DNA long-read sequencing; MK performed  
976 molecular biology experiments; RA, CS, EC and BN performed the bioinformatic analyses;  
977 FD and EC provided access to computational resources. All authors contributed critically to  
978 the drafts and gave final approval for publication.

979

## 980 **References**

- 981 200 mammals project. n.d. Comparative Genomics – 200 Mammals.
- 982 Abascal F, Corvelo A, Cruz F, Villanueva-Cañas JL, Vlasova A, Marcet-Houben M,  
983 Martínez-Cruz B, Cheng JY, Prieto P, Quesada V, Quilez J, Li G, García F, Rubio-  
984 Camarillo M, Frias L, Ribeca P, Capella-Gutiérrez S, Rodríguez JM, Câmara F, Lowy E,  
985 Cozzuto L, Erb I, Tress ML, Rodriguez-Ales JL, Ruiz-Orera J, Reverter F, Casas-Marce  
986 M, Soriano L, Arango JR, Derdak S, Galán B, Blanc J, Gut M, Lorente-Galdos B,  
987 Andrés-Nieto M, López-Otín C, Valencia A, Gut I, García JL, Guigó R, Murphy WJ,  
988 Ruiz-Herrera A, Marques-Bonet T, Roma G, Notredame C, Mailund T, Albà MM,  
989 Gabaldón T, Alioto T, Godoy JA. 2016. Extreme genomic erosion after recurrent  
990 demographic bottlenecks in the highly endangered Iberian lynx. *Genome Biol* **17**:251.  
991 doi:10.1186/s13059-016-1090-1
- 992 Agnarsson I, Kuntner M, May-Collado LJ. 2010. Dogs, cats, and kin: A molecular species-  
993 level phylogeny of Carnivora. *Mol Phylogenet Evol* **54**:726–745.  
994 doi:10.1016/J.YMPEV.2009.10.033
- 995 Aird D, Ross MG, Chen WS, Danielsson M, Fennell T, Russ C, Jaffe DB, Nusbaum C,  
996 Gnirke A. 2011. Analyzing and minimizing PCR amplification bias in Illumina  
997 sequencing libraries. *Genome Biol* **12**:R18. doi:10.1186/gb-2011-12-2-r18
- 998 Allen R, Ryan H, Davis BW, King C, Frantz L, Irving-Pease E, Barnett R, Linderholm A,  
999 Loog L, Haile J, Lebrasseur O, White M, Kitchener AC, Murphy WJ, Larson G. 2020. A  
1000 mitochondrial genetic divergence proxy predicts the reproductive compatibility of  
1001 mammalian hybrids. *Proc R Soc B Biol Sci* **287**:20200690. doi:10.1098/rspb.2020.0690
- 1002 Allio R, Schomaker-Bastos A, Romiguier J, Prosdocimi F, Nabholz B, Delsuc F. 2020a.  
1003 MitoFinder: Efficient automated large-scale extraction of mitogenomic data in target  
1004 enrichment phylogenomics. *Mol Ecol Resour* 1755–0998.13160. doi:10.1111/1755-  
1005 0998.13160
- 1006 Allio R, Scornavacca C, Nabholz B, Clamens A-L, Sperling FA, Condamine FL. 2020b.  
1007 Whole genome shotgun phylogenomics resolves the pattern and timing of swallowtail  
1008 butterfly evolution. *Syst Biol* **69**:38–60. doi:10.1093/sysbio/syz030
- 1009 Armstrong EE, Taylor RW, Miller DE, Kaelin CB, Barsh GS, Hadly EA, Petrov D. 2020.

- 1010 Long live the king: chromosome-level assembly of the lion (*Panthera leo*) using linked-  
1011 read, Hi-C, and long-read data. *BMC Biol* **18**:3. doi:10.1186/s12915-019-0734-5
- 1012 Arnason U, Gullberg A, Janke A, Kullberg M. 2007. Mitogenomic analyses of caniform  
1013 relationships. *Mol Phylogenet Evol* **45**:863–874. doi:10.1016/J.YMPEV.2007.06.019
- 1014 Atickem A, Stenseth NC, Drouilly M, Bock S, Roos C, Zinner D. 2018. Deep divergence  
1015 among mitochondrial lineages in African jackals. *Zool Scr* **47**:1–8.  
1016 doi:10.1111/zsc.12257
- 1017 Barnett R, Yamaguchi N, Barnes I, Cooper A. 2006. The origin, current diversity and future  
1018 conservation of the modern lion (*Panthera leo*). *Proc R Soc B Biol Sci* **273**:2119–2125.  
1019 doi:10.1098/rspb.2006.3555
- 1020 Batra SS, Levy-Sakin M, Robinson J, Guillory J, Durinck S, Kwok P-Y, Cox LA, Seshagiri  
1021 S, Song YS, Wall JD. 2019a. Accurate assembly of the olive baboon (*Papio anubis*)  
1022 genome using long--read and Hi-C data. *bioRxiv* 678771. doi:10.1101/678771
- 1023 Batra SS, Levy-Sakin M, Robinson J, Guillory J, Durinck S, Kwok P-Y, Cox LA, Seshagiri  
1024 S, Song YS, Wall JD. 2019b. Accurate assembly of the olive baboon (*Papio anubis*)  
1025 genome using long--read and Hi-C data. *bioRxiv* 678771. doi:10.1101/678771
- 1026 Blaimer BB, LaPolla JS, Branstetter MG, Lloyd MW, Brady SG. 2016. Phylogenomics,  
1027 biogeography and diversification of obligate mealybug-tending ants in the genus  
1028 *Acropyga*. *Mol Phylogenet Evol* **102**:20–29. doi:10.1016/J.YMPEV.2016.05.030
- 1029 Blanco MB, Greene LK, Williams RC, Andrianandrasana L, Yoder AD, Larsen PA. 2019.  
1030 Next-generation in situ conservation and educational outreach in Madagascar using a  
1031 mobile genetics lab. *bioRxiv* 650614. doi:10.1101/650614
- 1032 Bolger AM, Lohse M, Usadel B. 2014. Trimmomatic: A flexible trimmer for Illumina  
1033 sequence data. *Bioinformatics* **30**:2114–2120. doi:10.1093/bioinformatics/btu170
- 1034 Boutet E, Lieberherr D, Tognolli M, Schneider M, Bansal P, Bridge AJ, Poux S, Bougueleret  
1035 L, Xenarios I. 2016. UniProtKB/Swiss-Prot, the manually annotated section of the  
1036 UniProt KnowledgeBase: How to use the entry view. Humana Press, New York, NY.  
1037 pp. 23–54. doi:10.1007/978-1-4939-3167-5\_2
- 1038 Caley T, Extier T, Collins JA, Schefuß E, Dupont L, Malaizé B, Rossignol L, Souron A,  
1039 McClymont EL, Jimenez-Espejo FJ, García-Comas C, Eynaud F, Martinez P, Roche  
1040 DM, Jorry SJ, Charlier K, Wary M, Gourves PY, Billy I, Giraudeau J. 2018. A two-  
1041 million-year-long hydroclimatic context for hominin evolution in southeastern Africa.  
1042 *Nature* **560**:76–79. doi:10.1038/s41586-018-0309-6
- 1043 Casas-Marce M, Soriano L, López-Bao J V., Godoy JA. 2013. Genetics at the verge of  
1044 extinction: insights from the Iberian lynx. *Mol Ecol* **22**:5503–5515.  
1045 doi:10.1111/mec.12498
- 1046 Chase BM, Niedermeyer EM, Boom A, Carr AS, Chevalier M, He F, Meadows ME, Ogle N,  
1047 Reimer PJ. 2019. Orbital controls on Namib Desert hydroclimate over the past 50,000  
1048 years. *Geology* **47**:867–871. doi:10.1130/G46334.1
- 1049 Chevalier M, Chase BM. 2015. Southeast African records reveal a coherent shift from high-  
1050 to low-latitude forcing mechanisms along the east African margin across last glacial-  
1051 interglacial transition. *Quat Sci Rev* **125**:117–130. doi:10.1016/j.quascirev.2015.07.009

- 1052 Clark HO. 2005. *Otocyon megalotis*. *Mamm Species* 1–5. doi:10.1644/1545-  
1053 1410(2005)766[0001:OM]2.0.CO;2
- 1054 Datema E, Hulzink RJM, Blommers L, Valle-Inclan JE, Orsouw N van, Wittenberg AHJ,  
1055 Vos M de. 2016. The megabase-sized fungal genome of *Rhizoctonia solani* assembled  
1056 from nanopore reads only. *bioRxiv* 084772. doi:10.1101/084772
- 1057 De Queiroz K. 2007. Species concepts and species delimitation. *Syst Biol* **56**:879–886.  
1058 doi:10.1080/10635150701701083
- 1059 Dehghani R, Wanntorp L, Pagani P, Källersjö M, Werdelin L, Veron G. 2008.  
1060 Phylogeography of the white-tailed mongoose (Herpestidae, Carnivora, Mammalia)  
1061 based on partial sequences of the mtDNA control region. *J Zool* **276**:385–393.  
1062 doi:10.1111/j.1469-7998.2008.00502.x
- 1063 Delisle I, Strobeck C. 2005. A phylogeny of the Caniformia (order Carnivora) based on 12  
1064 complete protein-coding mitochondrial genes. *Mol Phylogenet Evol* **37**:192–201.  
1065 doi:10.1016/J.YMPEV.2005.04.025
- 1066 deMenocal PB. 2004. African climate change and faunal evolution during the Pliocene-  
1067 Pleistocene. *Earth Planet Sci Lett* **220**:3–24. doi:10.1016/S0012-821X(04)00003-2
- 1068 deMenocal PB. 1995. Plio-Pleistocene African climate. *Science (80- )*.  
1069 doi:10.1126/science.270.5233.53
- 1070 Di Genova A, Ruz GA, Sagot M-F, Maass A. 2018. Fast-SG: an alignment-free algorithm for  
1071 hybrid assembly. *Gigascience* **7**. doi:10.1093/gigascience/giy048
- 1072 Di Franco A, Poujol R, Baurain D, Philippe H. 2019. Evaluating the usefulness of alignment  
1073 filtering methods to reduce the impact of errors on evolutionary inferences. *BMC Evol*  
1074 *Biol* **19**:21. doi:10.1186/s12862-019-1350-2
- 1075 Díaz-Viraqué F, Pita S, Greif G, de Souza R de CM, Iraola G, Robello C. 2019. Nanopore  
1076 sequencing significantly improves genome assembly of the protozoan parasite  
1077 *Trypanosoma cruzi*. *Genome Biol Evol* **11**:1952–1957. doi:10.1093/gbe/evz129
- 1078 DISCOVAR | Assemble genomes, find variants. n.d.  
1079 <https://software.broadinstitute.org/software/discovar/blog/>
- 1080 Doronina L, Churakov G, Shi J, Brosius J, Baertsch R, Clawson H, Schmitz J. 2015.  
1081 Exploring massive incomplete lineage sorting in Arctoids (Laurasiatheria, Carnivora).  
1082 *Mol Biol Evol* **32**:msv188. doi:10.1093/molbev/msv188
- 1083 Dudchenko O, Batra SS, Omer AD, Nyquist SK, Hoeger M, Durand NC, Shamim MS,  
1084 Machol I, Lander ES, Aiden AP, Aiden EL. 2017. De novo assembly of the *Aedes*  
1085 *aegypti* genome using Hi-C yields chromosome-length scaffolds. *Science (80- )* **356**:92–  
1086 95. doi:10.1126/science.aal3327
- 1087 Eddy SR. 2011. Accelerated profile HMM searches. *PLoS Comput Biol* **7**.  
1088 doi:10.1371/journal.pcbi.1002195
- 1089 Eizirik E, Murphy WJ, Koepfli K-P, Johnson WE, Dragoo JW, Wayne RK, O’Brien SJ.  
1090 2010. Pattern and timing of diversification of the mammalian order Carnivora inferred  
1091 from multiple nuclear gene sequences. *Mol Phylogenet Evol* **56**:49–63.  
1092 doi:10.1016/J.YMPEV.2010.01.033

- 1093 Ekblom R, Brechlin B, Persson J, Smeds L, Johansson M, Magnusson J, Flagstad Ø, Ellegren  
1094 H. 2018. Genome sequencing and conservation genomics in the Scandinavian wolverine  
1095 population. *Conserv Biol* **32**:1301–1312. doi:10.1111/cobi.13157
- 1096 Etherington GJ, Heavens D, Baker D, Lister A, McNelly R, Garcia G, Clavijo B, Macaulay I,  
1097 Haerty W, Di Palma F. 2020. Sequencing smart: *De novo* sequencing and assembly  
1098 approaches for a non-model mammal. *Gigascience* **9**.  
1099 doi:10.1093/GIGASCIENCE/GIAA045
- 1100 Faurby S, Eiserhardt WL, Svenning J. 2016. Strong effects of variation in taxonomic opinion  
1101 on diversification analyses. *Methods Ecol Evol* **7**:4–13. doi:10.1111/2041-210X.12449
- 1102 Flynn JJ, Finarelli JA, Spaulding M. 2010. Phylogeny of the Carnivora and  
1103 Carnivoramorphia, and the use of the fossil record to enhance understanding of  
1104 evolutionary transformations In: Goswami A, Friscia A, editors. *Carnivoran Evolution*.  
1105 Cambridge: Cambridge University Press. pp. 25–63.  
1106 doi:10.1017/CBO9781139193436.003
- 1107 Flynn JJ, Finarelli JA, Zehr S, Hsu J, Nedbal MA. 2005. Molecular phylogeny of the  
1108 Carnivora (Mammalia): assessing the impact of increased sampling on resolving  
1109 enigmatic relationships. *Syst Biol* **54**:317–337. doi:10.1080/10635150590923326
- 1110 Flynn JJ, Nedbal MA. 1998. Phylogeny of the Carnivora (Mammalia): congruence vs  
1111 incompatibility among multiple data sets. *Mol Phylogenet Evol* **9**:414–426.  
1112 doi:10.1006/MPEV.1998.0504
- 1113 Frankham R, Ballou JD, Dudash MR, Eldridge MDB, Fenster CB, Lacy RC, Mendelson JR,  
1114 Porton IJ, Ralls K, Ryder OA. 2012. Implications of different species concepts for  
1115 conserving biodiversity. *Biol Conserv* **153**:25–31. doi:10.1016/J.BIOCON.2012.04.034
- 1116 Galov A, Fabbri E, Caniglia R, Arbanasić H, Lapalombella S, Florijančić T, Bošković I,  
1117 Galaverni M, Randi E. 2015. First evidence of hybridization between golden jackal (  
1118 *Canis aureus*) and domestic dog (*Canis familiaris*) as revealed by genetic markers. *R  
1119 Soc Open Sci* **2**:150450. doi:10.1098/rsos.150450
- 1120 Galtier N. 2019. Delineating species in the speciation continuum: A proposal. *Evol Appl*  
1121 **12**:657–663. doi:10.1111/eva.12748
- 1122 Galtier N, Nabholz B, Glémin S, Hurst GDD. 2009. Mitochondrial DNA as a marker of  
1123 molecular diversity: a reappraisal. *Mol Ecol* **18**:4541–4550. doi:10.1111/j.1365-  
1124 294X.2009.04380.x
- 1125 Gan HM, Falk S, Morales HE, Austin CM, Sunnucks P, Pavlova A. 2019. Genomic evidence  
1126 of neo-sex chromosomes in the eastern yellow robin. *Gigascience* **8**.  
1127 doi:10.1093/gigascience/giz111
- 1128 Garrison E, Marth G. 2012. Haplotype-based variant detection from short-read sequencing.
- 1129 Gopalakrishnan S, Samaniego Castruita JA, Sinding M-HS, Kuderna LFK, Räikkönen J,  
1130 Petersen B, Sicheritz-Ponten T, Larson G, Orlando L, Marques-Bonet T, Hansen AJ,  
1131 Dalén L, Gilbert MTP. 2017. The wolf reference genome sequence (*Canis lupus lupus*)  
1132 and its implications for *Canis* spp. population genomics. *BMC Genomics* **18**:495.  
1133 doi:10.1186/s12864-017-3883-3
- 1134 Gopalakrishnan S, Sinding M-HS, Ramos-Madrugal J, Niemann J, Samaniego Castruita JA,



- 1135 Vieira FG, Carøe C, Montero M de M, Kuderna L, Serres A, González-Basallote VM,  
1136 Liu Y-H, Wang G-D, Marques-Bonet T, Mirarab S, Fernandes C, Gaubert P, Koepfli K-  
1137 P, Budd J, Rueness EK, Sillero C, Heide-Jørgensen MP, Petersen B, Sicheritz-Ponten T,  
1138 Bachmann L, Wiig Ø, Hansen AJ, Gilbert MTP. 2018. Interspecific gene flow shaped  
1139 the evolution of the genus *Canis*. *Curr Biol* **28**:3441–3449.e5.  
1140 doi:10.1016/J.CUB.2018.08.041
- 1141 Grant KM, Rohling EJ, Westerhold T, Zabel M, Heslop D, Konijnendijk T, Lourens L. 2017.  
1142 A 3 million year index for North African humidity/aridity and the implication of  
1143 potential pan-African Humid periods. *Quat Sci Rev* **171**:100–118.  
1144 doi:10.1016/j.quascirev.2017.07.005
- 1145 Guéguen L, Gaillard S, Boussau B, Gouy M, Groussin M, Rochette NC, Bigot T, Fournier D,  
1146 Pouyet F, Cahais V, Bernard A, Scornavacca C, Nabholz B, Haudry A, Dachary L,  
1147 Galtier N, Belkhir K, Dutheil JY. 2013. Bio++: Efficient extensible libraries and tools  
1148 for computational molecular evolution. *Mol Biol Evol* **30**:1745–1750.  
1149 doi:10.1093/molbev/mst097
- 1150 Guschanski K, Krause J, Sawyer S, Valente LM, Bailey S, Finstermeier K, Sabin R, Gilissen  
1151 E, Sonet G, Nagy ZT, Lenglet G, Mayer F, Savolainen V. 2013. Next-generation  
1152 museomics disentangles one of the largest primate radiations. *Syst Biol* **62**:539–554.  
1153 doi:10.1093/sysbio/syt018
- 1154 Holsinger KE, Weir BS. 2009. Genetics in geographically structured populations: defining,  
1155 estimating and interpreting FST. *Nat Rev Genet* **10**:639–650. doi:10.1038/nrg2611
- 1156 Holt C, Yandell M. 2011. MAKER2: an annotation pipeline and genome-database  
1157 management tool for second-generation genome projects. *BMC Bioinformatics* **12**:491.  
1158 doi:10.1186/1471-2105-12-491
- 1159 Hudson RR, Slatkin M, Maddison WP. 1992. Estimation of levels of gene flow from DNA  
1160 sequence data. *Genetics* **132**.
- 1161 IUCN 2020. 2020. The IUCN Red List of Threatened Species. Version 2020-1.  
1162 <https://www.iucnredlist.org>.
- 1163 Jain M, Koren S, Miga KH, Quick J, Rand AC, Sasani TA, Tyson JR, Beggs AD, Dilthey  
1164 AT, Fiddes IT, Malla S, Marriott H, Nieto T, O’Grady J, Olsen HE, Pedersen BS, Rhie  
1165 A, Richardson H, Quinlan AR, Snutch TP, Tee L, Paten B, Phillippy AM, Simpson JT,  
1166 Loman NJ, Loose M. 2018. Nanopore sequencing and assembly of a human genome  
1167 with ultra-long reads. *Nat Biotechnol* **36**:338–345. doi:10.1038/nbt.4060
- 1168 Jain M, Olsen HE, Paten B, Akeson M. 2016. The Oxford Nanopore MinION: delivery of  
1169 nanopore sequencing to the genomics community. *Genome Biol* **17**:239.  
1170 doi:10.1186/s13059-016-1103-0
- 1171 Jansen HJ, Liem M, Jong-Raadsen SA, Dufour S, Weltzien F-A, Swinkels W, Koelewijn A,  
1172 Palstra AP, Pelster B, Spaik HP, Thillart GE van den, Dirks RP, Henkel C V. 2017.  
1173 Rapid de novo assembly of the European eel genome from nanopore sequencing reads.  
1174 *Sci Rep* **7**:7213. doi:10.1038/s41598-017-07650-6
- 1175 Jeffroy O, Brinkmann H, Delsuc F, Philippe H. 2006. Phylogenomics: the beginning of  
1176 incongruence? *Trends Genet* **22**:225–231. doi:10.1016/J.TIG.2006.02.003



- 1177 Jiang JB, Quattrini AM, Francis WR, Ryan JF, Rodríguez E, McFadden CS. 2019. A hybrid  
1178 de novo assembly of the sea pansy ( *Renilla muelleri* ) genome. *Gigascience* **8**.  
1179 doi:10.1093/gigascience/giz026
- 1180 Johnson TC, Werne JP, Brown ET, Abbott A, Berke M, Steinman BA, Halbur J, Contreras S,  
1181 Grosshuesch S, Deino A, Scholz CA, Lyons RP, Schouten S, Damsté JSS. 2016. A  
1182 progressively wetter climate in southern East Africa over the past 1.3 million years.  
1183 *Nature* **537**:220–224. doi:10.1038/nature19065
- 1184 Kadobianskyi M, Schulze L, Schuelke M, Judkewitz B. 2019. Hybrid genome assembly and  
1185 annotation of *Danionella translucida*, a transparent fish with the smallest known  
1186 vertebrate brain. *bioRxiv* 539692. doi:10.1101/539692
- 1187 Kalyaanamoorthy S, Minh BQ, Wong TKF, von Haeseler A, Jermiin LS. 2017. ModelFinder:  
1188 fast model selection for accurate phylogenetic estimates. *Nat Methods* **14**:587–589.  
1189 doi:10.1038/nmeth.4285
- 1190 Katoh K, Standley DM. 2013. MAFFT multiple sequence alignment software version 7:  
1191 Improvements in performance and usability. *Mol Biol Evol* **30**:772–780.  
1192 doi:10.1093/molbev/mst010
- 1193 Kearse M, Moir R, Wilson A, Stones-Havas S, Cheung M, Sturrock S, Buxton S, Cooper A,  
1194 Markowitz S, Duran C, Thierer T, Ashton B, Meintjes P, Drummond A. 2012. Geneious  
1195 Basic: An integrated and extendable desktop software platform for the organization and  
1196 analysis of sequence data. *Bioinformatics* **28**:1647–1649.  
1197 doi:10.1093/bioinformatics/bts199
- 1198 Kim S, Cho YS, Kim H-M, Chung O, Kim H, Jho S, Seomun H, Kim J, Bang WY, Kim C,  
1199 An J, Bae CH, Bhak Y, Jeon S, Yoon H, Kim Y, Jun J, Lee H, Cho S, Uphyrkina O,  
1200 Kostyria A, Goodrich J, Miquelle D, Roelke M, Lewis J, Yurchenko A, Bankevich A,  
1201 Cho J, Lee S, Edwards JS, Weber JA, Cook J, Kim S, Lee H, Manica A, Lee I, O'Brien  
1202 SJ, Bhak J, Yeo J-H. 2016. Comparison of carnivore, omnivore, and herbivore  
1203 mammalian genomes with a new leopard assembly. *Genome Biol* **17**:211.  
1204 doi:10.1186/s13059-016-1071-4
- 1205 Koehler CE, Richardson PRK. 1990. *Proteles cristatus*. *Mamm Species* 1–6.  
1206 doi:10.2307/3504197
- 1207 Koepfli K-P, Jenks SM, Eizirik E, Zahirpour T, Valkenburgh B Van, Wayne RK. 2006.  
1208 Molecular systematics of the Hyaenidae: Relationships of a relictual lineage resolved by  
1209 a molecular supermatrix. *Mol Phylogenet Evol* **38**:603–620.  
1210 doi:10.1016/J.YMPEV.2005.10.017
- 1211 Koepfli K-P, Paten B, O'Brien SJ. 2015. The Genome 10K Project: A Way Forward. *Annu*  
1212 *Rev Anim Biosci* **3**:57–111. doi:10.1146/annurev-animal-090414-014900
- 1213 Koren S, Walenz BP, Berlin K, Miller JR, Bergman NH, Phillippy AM. 2017. Canu: scalable  
1214 and accurate long-read assembly via adaptive k-mer weighting and repeat separation.  
1215 *Genome Res* **27**:722–736. doi:10.1101/GR.215087.116
- 1216 Kumar S, Filipski AJ, Battistuzzi FU, Kosakovsky Pond SL, Tamura K. 2012. Statistics and  
1217 truth in phylogenomics. *Mol Biol Evol* **29**:457–472. doi:10.1093/molbev/msr202
- 1218 Kurtzer GM, Sochat V, Bauer MW. 2017. Singularity: Scientific containers for mobility of

- 1219 compute. *PLoS One* **12**:e0177459. doi:10.1371/journal.pone.0177459
- 1220 Kwan HH, Culibrk L, Taylor GA, Leelakumari S, Tan R, Jackman SD, Tse K, MacLeod T,  
1221 Cheng D, Chuah E, Kirk H, Pandoh P, Carlsen R, Zhao Y, Mungall AJ, Moore R, Birol  
1222 I, Marra MA, Rosen DAS, Haulena M, Jones SJM, Kwan HH, Culibrk L, Taylor GA,  
1223 Leelakumari S, Tan R, Jackman SD, Tse K, MacLeod T, Cheng D, Chuah E, Kirk H,  
1224 Pandoh P, Carlsen R, Zhao Y, Mungall AJ, Moore R, Birol I, Marra MA, Rosen DAS,  
1225 Haulena M, Jones SJM. 2019. The Genome of the Steller Sea Lion (*Eumetopias*  
1226 *jubatus*). *Genes (Basel)* **10**:486. doi:10.3390/genes10070486
- 1227 L Y, YP Z. 2006. Phylogeny of the caniform Carnivora: evidence from multiple genes.  
1228 *Genetica* **127**. doi:10.1007/S10709-005-2482-4
- 1229 Laetsch DR, Blaxter ML. 2017. BlobTools: Interrogation of genome assemblies.  
1230 *F1000Research* **6**:1287. doi:10.12688/f1000research.12232.1
- 1231 Lartillot N, Rodrigue N, Stubbs D, Richer J. 2013. PhyloBayes MPI: Phylogenetic  
1232 reconstruction with infinite mixtures of profiles in a parallel environment. *Syst Biol*  
1233 **62**:611–615. doi:10.1093/sysbio/syt022
- 1234 Li G, Davis BW, Eizirik E, Murphy WJ. 2016. Phylogenomic evidence for ancient  
1235 hybridization in the genomes of living cats (Felidae). *Genome Res* **26**:1–11.  
1236 doi:10.1101/GR.186668.114
- 1237 Li H. 2013. Aligning sequence reads, clone sequences and assembly contigs with BWA-  
1238 MEM.
- 1239 Li H, Durbin R. 2011. Inference of human population history from individual whole-genome  
1240 sequences. *Nature* **475**:493–496. doi:10.1038/nature10231
- 1241 Li H, Handsaker B, Wysoker A, Fennell T, Ruan J, Homer N, Marth G, Abecasis G, Durbin  
1242 R. 2009. The sequence alignment/map format and SAMtools. *Bioinformatics* **25**:2078–  
1243 2079. doi:10.1093/bioinformatics/btp352
- 1244 Li R, Fan W, Tian G, Zhu H, He L, Cai J, Huang Q, Cai Q, Li B, Bai Y, Zhang Z, Zhang Y,  
1245 Wang W, Li J, Wei F, Li H, Jian M, Li J, Zhang Z, Nielsen R, Li D, Gu W, Yang Z,  
1246 Xuan Z, Ryder OA, Leung FCC, Zhou Y, Cao J, Sun X, Fu Y, Fang X, Guo X, Wang B,  
1247 Hou R, Shen F, Mu B, Ni P, Lin R, Qian W, Wang G, Yu C, Nie W, Wang J, Wu Z,  
1248 Liang H, Min J, Wu Q, Cheng S, Ruan J, Wang M, Shi Z, Wen M, Liu B, Ren X, Zheng  
1249 H, Dong D, Cook K, Shan G, Zhang H, Kosiol C, Xie X, Lu Z, Zheng H, Li Y, Steiner  
1250 CC, Lam TTY, Lin S, Zhang Q, Li G, Tian J, Gong T, Liu H, Zhang D, Fang L, Ye C,  
1251 Zhang J, Hu W, Xu A, Ren Y, Zhang G, Bruford MW, Li Q, Ma L, Guo Y, An N, Hu Y,  
1252 Zheng Y, Shi Y, Li Z, Liu Q, Chen Y, Zhao J, Qu N, Zhao S, Tian F, Wang X, Wang H,  
1253 Xu L, Liu X, Vinar T, Wang Y, Lam TW, Yiu SM, Liu S, Zhang H, Li D, Huang Y,  
1254 Wang X, Yang G, Jiang Z, Wang J, Qin N, Li L, Li J, Bolund L, Kristiansen K, Wong  
1255 GKS, Olson M, Zhang X, Li S, Yang H, Wang J, Wang J. 2010. The sequence and de  
1256 novo assembly of the giant panda genome. *Nature* **463**:311–317.  
1257 doi:10.1038/nature08696
- 1258 Lim S, Chase BM, Chevalier M, Reimer PJ. 2016. 50,000 years of vegetation and climate  
1259 change in the southern Namib Desert, Pella, South Africa. *Palaeogeogr Palaeoclimatol*  
1260 *Palaeoecol* **451**:197–209. doi:10.1016/j.palaeo.2016.03.001
- 1261 Lindblad-Toh K, Garber M, Zuk O, Lin MF, Parker BJ, Washietl S, Kheradpour P, Ernst J,

- 1262 Jordan G, Mauceli E, Ward LD, Lowe CB, Holloway AK, Clamp M, Gnerre S, Alföldi  
1263 J, Beal K, Chang J, Clawson H, Cuff J, Di Palma F, Fitzgerald S, Flicek P, Guttman M,  
1264 Hubisz MJ, Jaffe DB, Jungreis I, Kent WJ, Kostka D, Lara M, Martins AL, Massingham  
1265 T, Moltke I, Raney BJ, Rasmussen MD, Robinson J, Stark A, Vilella AJ, Wen J, Xie X,  
1266 Zody MC, Worley KC, Kovar CL, Muzny DM, Gibbs RA, Warren WC, Mardis ER,  
1267 Weinstock GM, Wilson RK, Birney E, Margulies EH, Herrero J, Green ED, Haussler D,  
1268 Siepel A, Goldman N, Pollard KS, Pedersen JS, Lander ES, Kellis M, Baldwin J, Bloom  
1269 T, Chin CW, Heiman D, Nicol R, Nusbaum C, Young S, Wilkinson J, Cree A, Dihn HH,  
1270 Fowler G, Jhangiani S, Joshi V, Lee S, Lewis LR, Nazareth L V., Okwuonu G,  
1271 Santibanez J, Delehaunty K, Dooling D, Fronik C, Fulton L, Fulton B, Graves T, Minx  
1272 P, Sodergren E. 2011. A high-resolution map of human evolutionary constraint using 29  
1273 mammals. *Nature* **478**:476–482. doi:10.1038/nature10530
- 1274 Liu S, Hansen MM. 2017. PSMC (pairwise sequentially Markovian coalescent) analysis of  
1275 RAD (restriction site associated DNA) sequencing data. *Mol Ecol Resour* **17**:631–641.  
1276 doi:10.1111/1755-0998.12606
- 1277 Liu S, Lorenzen ED, Fumagalli M, Li B, Harris K, Xiong Z, Zhou L, Korneliussen TS, Somel  
1278 M, Babbitt C, Wray G, Li J, He W, Wang Z, Fu W, Xiang X, Morgan CC, Doherty A,  
1279 O’Connell MJ, McInerney JO, Born EW, Dalén L, Dietz R, Orlando L, Sonne C, Zhang  
1280 G, Nielsen R, Willerslev E, Wang J. 2014. Population genomics reveal recent speciation  
1281 and rapid evolutionary adaptation in polar bears. *Cell* **157**:785–794.  
1282 doi:10.1016/J.CELL.2014.03.054
- 1283 Lorenzen ED, Heller R, Siegismund HR. 2012. Comparative phylogeography of African  
1284 savannah ungulates 1. *Mol Ecol* **21**:3656–3670. doi:10.1111/j.1365-294X.2012.05650.x
- 1285 Luo R, Liu B, Xie Y, Li Z, Huang W, Yuan J, He G, Chen Y, Pan Q, Liu Y, Tang J, Wu G,  
1286 Zhang H, Shi Y, Liu Y, Yu C, Wang B, Lu Y, Han C, Cheung DW, Yiu S-M, Peng S,  
1287 Xiaoqian Z, Liu G, Liao X, Li Y, Yang H, Wang J, Lam T-W, Wang J. 2012.  
1288 SOAPdenovo2: An empirically improved memory-efficient short-read de novo  
1289 assembler. *Gigascience* **1**:18. doi:10.1186/2047-217X-1-18
- 1290 Mairret TA. 2019. Snake scale clips as a source of high quality DNA suitable for RAD  
1291 sequencing. *Conserv Genet Resour* **11**:373–375. doi:10.1007/s12686-018-1019-y
- 1292 Maslin MA, Brierley CM, Milner AM, Shultz S, Trauth MH, Wilson KE. 2014. East african  
1293 climate pulses and early human evolution. *Quat Sci Rev*.  
1294 doi:10.1016/j.quascirev.2014.06.012
- 1295 Meredith RW, Janečka JE, Gatesy J, Ryder OA, Fisher CA, Teeling EC, Goodbla A, Eizirik  
1296 E, Simão TLL, Stadler T, Rabosky DL, Honeycutt RL, Flynn JJ, Ingram CM, Steiner C,  
1297 Williams TL, Robinson TJ, Burk-Herrick A, Westerman M, Ayoub NA, Springer MS,  
1298 Murphy WJ. 2011. Impacts of the cretaceous terrestrial revolution and KPg extinction  
1299 on mammal diversification. *Science (80- )* **334**:521–524.  
1300 doi:10.1126/SCIENCE.1211028
- 1301 Meyer CP, Paulay G. 2005. DNA barcoding: error rates based on comprehensive sampling.  
1302 *PLoS Biol* **3**:e422. doi:10.1371/journal.pbio.0030422
- 1303 Michael TP, Jupe F, Bemm F, Motley ST, Sandoval JP, Lanz C, Loudet O, Weigel D, Ecker  
1304 JR. 2018. High contiguity Arabidopsis thaliana genome assembly with a single nanopore  
1305 flow cell. *Nat Commun* **9**:541. doi:10.1038/s41467-018-03016-2

- 1306 Miller JM, Hallager S, Monfort SL, Newby J, Bishop K, Tidmus SA, Black P, Houston B,  
1307 Matthee CA, Fleischer RC, Hallager S, Monfort SL, Newby J, Bishop ÁK, Tidmus SA,  
1308 Black P, Houston ÁB, Matthee CA. 2011. Phylogeographic analysis of nuclear and  
1309 mtDNA supports subspecies designations in the ostrich (*Struthio camelus*). *Conserv*  
1310 *Genet* **12**:423–431. doi:10.1007/s10592-010-0149-x
- 1311 Minh BQ, Hahn MW, Lanfear R. 2020. New methods to calculate concordance factors for  
1312 phylogenomic datasets. *Mol Biol Evol*. doi:10.1093/molbev/msaa106
- 1313 Nadachowska-Brzyska K, Burri R, Olason PI, Kawakami T, Smeds L, Ellegren H. 2013.  
1314 Demographic divergence history of pied flycatcher and collared flycatcher inferred from  
1315 whole-genome re-sequencing data. *PLoS Genet* **9**:e1003942.  
1316 doi:10.1371/journal.pgen.1003942
- 1317 Nguyen L-T, Schmidt HA, von Haeseler A, Minh BQ. 2014. IQ-TREE: A fast and effective  
1318 stochastic algorithm for estimating maximum-likelihood phylogenies. *Mol Biol Evol*  
1319 **32**:268–274. doi:10.1093/molbev/msu300
- 1320 Nicholls SM, Quick JC, Tang S, Loman NJ. 2019. Ultra-deep, long-read nanopore  
1321 sequencing of mock microbial community standards. *Gigascience* **8**.  
1322 doi:10.1093/gigascience/giz043
- 1323 Nishimura O, Hara Y, Kuraku S. 2017. gVolante for standardizing completeness assessment  
1324 of genome and transcriptome assemblies. *Bioinformatics* **33**:3635–3637.  
1325 doi:10.1093/bioinformatics/btx445
- 1326 Parker J, Helmstetter AJ, Devey D, Wilkinson T, Papadopoulos AST. 2017. Field-based  
1327 species identification of closely-related plants using real-time nanopore sequencing. *Sci*  
1328 *Rep* **7**:8345. doi:10.1038/s41598-017-08461-5
- 1329 Peng R, Zeng B, Meng X, Yue B, Zhang Z, Zou F. 2007. The complete mitochondrial  
1330 genome and phylogenetic analysis of the giant panda (*Ailuropoda melanoleuca*). *Gene*  
1331 **397**:76–83. doi:10.1016/J.GENE.2007.04.009
- 1332 Périquet S, Roxburgh L, le Roux A, Collinson WJ. 2018. Testing the value of citizen science  
1333 for roadkill studies: A case study from South Africa. *Front Ecol Evol* **6**:15.  
1334 doi:10.3389/fevo.2018.00015
- 1335 Pomerantz A, Peñafiel N, Arteaga A, Bustamante L, Pichardo F, Coloma LA, Barrio-Amorós  
1336 CL, Salazar-Valenzuela D, Prost S. 2018. Real-time DNA barcoding in a rainforest  
1337 using nanopore sequencing: opportunities for rapid biodiversity assessments and local  
1338 capacity building. *Gigascience* **7**. doi:10.1093/gigascience/giy033
- 1339 Ranwez V, Chantret N, Delsuc F. 2020. Aligning protein-coding nucleotide sequences with  
1340 MACSE. *Methods Mol Biol* **In press**.
- 1341 Ranwez V, Douzery EJP, Cambon C, Chantret N, Delsuc F. 2018. MACSE v2: Toolkit for  
1342 the alignment of coding sequences accounting for frameshifts and stop codons. *Mol Biol*  
1343 *Evol* **35**:2582–2584. doi:10.1093/molbev/msy159
- 1344 Ravinet M, Westram A, Johannesson K, Butlin R, André C, Panova M. 2016. Shared and  
1345 nonshared genomic divergence in parallel ecotypes of *Littorina saxatilis* at a local scale.  
1346 *Mol Ecol* **25**:287–305. doi:10.1111/mec.13332
- 1347 Rice ES, Green RE. 2019. New Approaches for Genome Assembly and Scaffolding. *Annu*



- 1348 *Rev Anim Biosci* 7:17–40. doi:10.1146/annurev-animal-020518-115344
- 1349 Rohland N, Pollack JL, Nagel D, Beauval C, Airvaux J, Pääbo S, Hofreiter M. 2005. The  
1350 population history of extant and extinct hyenas. *Mol Biol Evol* 22:2435–2443.  
1351 doi:10.1093/molbev/msi244
- 1352 Roux C, Fraïsse C, Romiguier J, Anciaux Y, Galtier N, Bierne N. 2016. Shedding light on the  
1353 grey zone of speciation along a continuum of genomic divergence. *PLOS Biol*  
1354 14:e2000234. doi:10.1371/journal.pbio.2000234
- 1355 Rybczynski N, Dawson MR, Tedford RH. 2009. A semi-aquatic Arctic mammalian carnivore  
1356 from the Miocene epoch and origin of Pinnipedia. *Nature* 458:1021–1024.  
1357 doi:10.1038/nature07985
- 1358 Sato JJ, Wolsan M, Minami S, Hosoda T, Sinaga MH, Hiyama K, Yamaguchi Y, Suzuki H.  
1359 2009. Deciphering and dating the red panda’s ancestry and early adaptive radiation of  
1360 Musteloidea. *Mol Phylogenet Evol* 53:907–922. doi:10.1016/J.YMPEV.2009.08.019
- 1361 Sato JJ, Wolsan M, Suzuki H, Hosoda T, Yamaguchi Y, Hiyama K, Kobayashi M, Minami S.  
1362 2006. Evidence from nuclear DNA sequences sheds light on the phylogenetic  
1363 relationships of Pinnipedia: single origin with affinity to Musteloidea. *Zoolog Sci*  
1364 23:125–146. doi:10.2108/zsj.23.125
- 1365 Schröder C, Bleidorn C, Hartmann S, Tiedemann R. 2009. Occurrence of Can-SINEs and  
1366 intron sequence evolution supports robust phylogeny of pinniped carnivores and their  
1367 terrestrial relatives. *Gene* 448:221–226. doi:10.1016/J.GENE.2009.06.012
- 1368 Scornavacca C, Belkhir K, Lopez J, Dernas R, Delsuc F, Douzery EJP, Ranwez V. 2019.  
1369 OrthoMaM v10: Scaling-up orthologous coding sequence and exon alignments with  
1370 more than one hundred mammalian genomes. *Mol Biol Evol* 36:861–862.  
1371 doi:10.1093/molbev/msz015
- 1372 Scott AD, Zimin A V., Puiu D, Workman R, Britton M, Zaman S, Caballero M, Read AC,  
1373 Bogdanove AJ, Burns E, Wegrzyn J, Timp W, Salzberg SL, Neale DB. 2020. The giant  
1374 sequoia genome and proliferation of disease resistance genes. *bioRxiv*  
1375 2020.03.17.995944. doi:10.1101/2020.03.17.995944
- 1376 Shafin K, Pesout T, Lorig-Roach R, Haukness M, Olsen HE, Bosworth C, Armstrong J, Tigyi  
1377 K, Maurer N, Koren S, Sedlazeck FJ, Marschall T, Mayes S, Costa V, Zook JM, Liu KJ,  
1378 Kilburn D, Sorensen M, Munson KM, Vollger MR, Monlong J, Garrison E, Eichler EE,  
1379 Salama S, Haussler D, Green RE, Akeson M, Phillippy A, Miga KH, Carnevali P, Jain  
1380 M, Paten B. 2020. Nanopore sequencing and the Shasta toolkit enable efficient de novo  
1381 assembly of eleven human genomes. *Nat Biotechnol* 1–10. doi:10.1038/s41587-020-  
1382 0503-6
- 1383 Shilling F, Perkins SE, Collinson W. 2015. Wildlife/Roadkill Observation and Reporting  
1384 Systems Handbook of Road Ecology. Chichester, UK: John Wiley & Sons, Ltd. pp. 492–  
1385 501. doi:10.1002/9781118568170.ch62
- 1386 Spitzer M, Wildenhain J, Rappsilber J, Tyers M. 2014. BoxPlotR: a web tool for generation  
1387 of box plots. *Nat Methods* 11:121–122. doi:10.1038/nmeth.2811
- 1388 Srivathsan A, Baloglu B, Wang W, Tan WX, Bertrand D, Ng AHQ, Boey EJH, Koh JJY,  
1389 Nagarajan N, Meier R. 2018. A MinION<sup>TM</sup>-based pipeline for fast and cost-effective

- 1390 DNA barcoding. *Mol Ecol Resour* **18**:1035–1049. doi:10.1111/1755-0998.12890
- 1391 Tan MH, Austin CM, Hammer MP, Lee YP, Croft LJ, Gan HM. 2018. Finding Nemo: hybrid  
1392 assembly with Oxford Nanopore and Illumina reads greatly improves the clownfish  
1393 (*Amphiprion ocellaris*) genome assembly. *Gigascience* **7**.  
1394 doi:10.1093/gigascience/gix137
- 1395 Tange O. 2011. Gnu parallel—the command-line power tool. *USENIX Mag* **36**:42–47.
- 1396 Team R core. 2020. R: A language and environment for statistical computing.
- 1397 Tilak M-K, Allio R, Delsuc F. 2020. An optimized protocol for sequencing mammalian  
1398 roadkill tissues with Oxford Nanopore Technology (ONT).  
1399 doi:10.17504/PROTOCOLS.IO.BEIXJCFN
- 1400 Tilak M-K, Botero-Castro F, Galtier N, Nabholz B. 2018. Illumina library preparation for  
1401 sequencing the GC-rich fraction of heterogeneous genomic DNA. *Genome Biol Evol*  
1402 **10**:616–622. doi:10.1093/gbe/evy022
- 1403 Tilak M-K, Justy F, Debiais-Thibaud M, Botero-Castro F, Delsuc F, Douzery EJP. 2015. A  
1404 cost-effective straightforward protocol for shotgun Illumina libraries designed to  
1405 assemble complete mitogenomes from non-model species. *Conserv Genet Resour* **7**:37–  
1406 40. doi:10.1007/s12686-014-0338-x
- 1407 Trauth MH, Larrasoana JC, Mudelsee M. 2009. Trends, rhythms and events in Plio-  
1408 Pleistocene African climate. *Quat Sci Rev* **28**:399–411.  
1409 doi:10.1016/j.quascirev.2008.11.003
- 1410 van Berkum NL, Lieberman-Aiden E, Williams L, Imakaev M, Gnirke A, Mirny LA, Dekker  
1411 J, Lander ES. 2010. Hi-C: A method to study the three-dimensional architecture of  
1412 genomes. *J Vis Exp* e1869. doi:10.3791/1869
- 1413 van Jaarsveld AS. 1993. A comparative investigation of hyaena and aardwolf life-histories,  
1414 with notes on spotted hyaena mortality patterns. *Trans R Soc South Africa* **48**:219–232.  
1415 doi:10.1080/00359199309520272
- 1416 Vaser R, Sović I, Nagarajan N, Šikić M. 2017. Fast and accurate de novo genome assembly  
1417 from long uncorrected reads. *Genome Res* **27**:737–746. doi:10.1101/GR.214270.116
- 1418 vonHoldt BM, Kays R, Pollinger JP, Wayne RK. 2016. Admixture mapping identifies  
1419 introgressed genomic regions in North American canids. *Mol Ecol* **25**:2443–2453.  
1420 doi:10.1111/mec.13667
- 1421 Walhund S. 2010. Zusammensetzung von populationen und korrelationserscheinungen vom  
1422 standpunkt der vererbungslehre aus betrachtet. *Hereditas* **11**:65–106.  
1423 doi:10.1111/j.1601-5223.1928.tb02483.x
- 1424 Walker BJ, Abeel T, Shea T, Priest M, Abouelliel A, Sakthikumar S, Cuomo CA, Zeng Q,  
1425 Wortman J, Young SK, Earl AM. 2014. Pilon: an Integrated tool for comprehensive  
1426 microbial variant detection and genome assembly improvement. *PLoS One* **9**:e112963.  
1427 doi:10.1371/journal.pone.0112963
- 1428 Walton LR, Joly DO. 2003. *Canis mesomelas*. *Mamm Species* **715**:1–9. doi:10.1644/715
- 1429 Wang W, Das A, Kainer D, Schalamun M, Morales-Suarez A, Schwessinger B, Lanfear R.

- 1430 2020. The draft nuclear genome assembly of *Eucalyptus pauciflora*: a pipeline for  
1431 comparing de novo assemblies. *Gigascience* **9**. doi:10.1093/gigascience/giz160
- 1432 Waterhouse RM, Seppey M, Simão FA, Manni M, Ioannidis P, Klioutchnikov G, Kriventseva  
1433 E V, Zdobnov EM. 2018. BUSCO applications from quality assessments to gene  
1434 prediction and phylogenomics. *Mol Biol Evol* **35**:543–548. doi:10.1093/molbev/msx319
- 1435 Weisenfeld NI, Yin S, Sharpe T, Lau B, Hegarty R, Holmes L, Sogoloff B, Tabbaa D,  
1436 Williams L, Russ C, Nusbaum C, Lander ES, Maccallum I, Jaffe DB. 2014.  
1437 Comprehensive variation discovery in single human genomes. *Nat Genet* **46**:1350–1355.  
1438 doi:10.1038/ng.3121
- 1439 Wenger AM, Peluso P, Rowell WJ, Chang P-C, Hall RJ, Concepcion GT, Ebler J,  
1440 Functammasan A, Kolesnikov A, Olson ND, Töpfer A, Alonge M, Mahmoud M, Qian  
1441 Y, Chin C-S, Phillippy AM, Schatz MC, Myers G, DePristo MA, Ruan J, Marschall T,  
1442 Sedlazeck FJ, Zook JM, Li H, Koren S, Carroll A, Rank DR, Hunkapiller MW. 2019.  
1443 Accurate circular consensus long-read sequencing improves variant detection and  
1444 assembly of a human genome. *Nat Biotechnol* **37**:1155–1162. doi:10.1038/s41587-019-  
1445 0217-9
- 1446 Westbury M V, Hartmann S, Barlow A, Wiesel I, Leo V, Welch R, Parker DM, Sicks F,  
1447 Ludwig A, Dalén L, Hofreiter M. 2018. Extended and continuous decline in effective  
1448 population size results in low genomic diversity in the world’s rarest hyena species, the  
1449 brown hyena. *Mol Biol Evol* **35**:1225–1237. doi:10.1093/molbev/msy037
- 1450 Wick RR, Judd LM, Holt KE. 2019. Performance of neural network basecalling tools for  
1451 Oxford Nanopore sequencing. *Genome Biol* **20**:129. doi:10.1186/s13059-019-1727-y
- 1452 Wickham H. 2016. *Ggplot2 : elegant graphics for data analysis*. Springer.
- 1453 Wilke CO. 2016. cowplot: Streamlined plot theme and plot annotations for “ggplot2.” *CRAN*  
1454 *Repos*.
- 1455 Wilson DE, Mittermeier RA, Cavallini P. 2009. *Handbook of the mammals of the world*, Vol.  
1456 1. ed. Barcelona: Lynx Edicions.
- 1457 Zdobnov EM, Tegenfeldt F, Kuznetsov D, Waterhouse RM, Simão FA, Ioannidis P, Seppey  
1458 M, Loetscher A, Kriventseva E V. 2017. OrthoDB v9.1: cataloging evolutionary and  
1459 functional annotations for animal, fungal, plant, archaeal, bacterial and viral orthologs.  
1460 *Nucleic Acids Res* **45**:D744–D749. doi:10.1093/nar/gkw1119
- 1461 Zhang C, Rabiee M, Sayyari E, Mirarab S. 2018. ASTRAL-III: polynomial time species tree  
1462 reconstruction from partially resolved gene trees. *BMC Bioinforma 2018 196* **19**:15–30.  
1463 doi:10.1186/s12859-018-2129-y
- 1464 Zimin A V., Marçais G, Puiu D, Roberts M, Salzberg SL, Yorke JA. 2013. The MaSuRCA  
1465 genome assembler. *Bioinformatics* **29**:2669–2677. doi:10.1093/bioinformatics/btt476
- 1466 Zimin A V., Puiu D, Luo M-C, Zhu T, Koren S, Marçais G, Yorke JA, Dvořák J, Salzberg  
1467 SL. 2017. Hybrid assembly of the large and highly repetitive genome of *Aegilops*  
1468 *tauschii*, a progenitor of bread wheat, with the MaSuRCA mega-reads algorithm.  
1469 *Genome Res* **27**:787–792. doi:10.1101/GR.213405.116
- 1470



## 1471 Additional files

1472

1473 **Figure S1:** Plot of the quality of Nanopore long reads base-called with either the *fast* or the *high*  
1474 *accuracy* option of Guppy v3.1.5. The quality of the base-calling step has a large impact on the final  
1475 quality of the assemblies by reducing the number of contigs and increasing the N50 value.

1476

1477 **Figure S2:** Definition of the genetic differentiation index (GDI) based on the F-statistic (FST). The  
1478 main difference between these two indexes is the use of heterozygous allele states for GDI rather than  
1479 real polymorphism for the FST. Green =  $\pi_{\text{within}}$ , Orange =  $\pi_{\text{between}}$ , Blue = Population A, Red =  
1480 Population A+B.

1481

1482 **Figure S3:** Graphical representation of the results of contamination analyses performed with  
1483 BlobTools for a) the aardwolf (*Proteles cristata*) and b) the bat-eared fox (*Otocyon megalotis*).

1484

1485 **Table S1:** Pairwise patristic distances estimated for the 142 species based on the phylogenetic tree  
1486 inferred with the 15 mitochondrial loci (2 rRNAs and 13 protein-coding genes).

1487

1488 **Table S2:** Results of Bayesian dating for the two nodes leading to the *Proteles cristata* spp. and the  
1489 *Otocyon megalotis* spp.. Divergence time estimates based on UGAM and LN models are reported  
1490 with associated 95% credibility intervals for each MCMC chain.

1491

1492 **Table S3:** Sample details and assembly statistics (Number of contigs/scaffolds and associated N50  
1493 values) for the 503 mammalian assemblies retrieved from NCBI  
1494 (<https://www.ncbi.nlm.nih.gov/assembly>) on August 13th, 2019 with filters: “Exclude derived from  
1495 surveillance project”, “Exclude anomalous”, “Exclude partial”, and using only the RefSeq assembly  
1496 for *Homo sapiens*.

1497

1498 **Table S4:** Genome completeness assessment of MaSuRCA and SOAPdenovo assemblies obtained for  
1499 *Proteles cristata* and *Otocyon megalotis* together with the 63 carnivore assemblies available at NCBI  
1500 and DNAZoo (<https://www.dnazoo.org/assemblies>) on August 13th, 2019 using Benchmarking  
1501 Universal Single-Copy Orthologs (BUSCO) v3 with the Mammalia OrthoDB 9 BUSCO gene set.

1502

1503 **Table S5:** Annotation summary and supermatrix composition statistics of the 53 species used to infer  
1504 the genome-scale Carnivora phylogeny.

1505

1506 **Table S6.** Sample details, Illumina sequencing, and assembly statistics of the 10 newly assembled  
1507 carnivoran mitochondrial genomes.

1508

1509 **Table S7:** Node calibrations used for the Bayesian dating inferences based on mitogenomic data.

1510

1511 **Table S8:** Results of contamination analyses performed with BlobTools for the aardwolf (*Proteles*  
1512 *cristata*).

1513

1514 **Table S9:** Results of contamination analyses performed with BlobTools for the bat-eared fox  
1515 (*Otocyon megalotis*).

1516

1517 **Table S10:** Summary information for the Carnivora genomes available either on Genbank, DNAZoo  
1518 (<https://www.dnazoo.org>) and the OrthoMaM database as of February 11th, 2020. The “OMM”  
1519 column indicates if the genome was available on OMM (yes) or not (no). The “Annotation” column  
1520 indicates whether the genome was already annotated (yes) or not (no).  
1521

**Supplementary Figures and Tables**  
**for**  
**High-quality carnivore genomes from roadkill samples enable species**  
**delimitation in aardwolf and bat-eared fox**

Rémi Allio<sup>1\*</sup>, Marie-Ka Tilak<sup>1</sup>, Céline Scornavacca<sup>1</sup>, Nico L. Avenant<sup>2</sup>, Erwan Corre<sup>3</sup>, Benoit Nabholz<sup>1</sup>, and Frédéric Delsuc<sup>1\*</sup>

<sup>1</sup>Institut des Sciences de l'Evolution de Montpellier (ISEM), CNRS, IRD, EPHE, Université de Montpellier, France [remi.allio@umontpellier.fr](mailto:remi.allio@umontpellier.fr) [marie-ka.tilak@umontpellier.fr](mailto:marie-ka.tilak@umontpellier.fr) [celine.scornavacca@umontpellier.fr](mailto:celine.scornavacca@umontpellier.fr) [benoit.nabholz@umontpellier.fr](mailto:benoit.nabholz@umontpellier.fr) [frederic.delsuc@umontpellier.fr](mailto:frederic.delsuc@umontpellier.fr)

<sup>2</sup>National Museum and Centre for Environmental Management, University of the Free State, Bloemfontein, South Africa [navenant@nasmus.co.za](mailto:navenant@nasmus.co.za)

<sup>3</sup>CNRS, Sorbonne Université, FR2424, ABiMS, Station Biologique de Roscoff, 29680 Roscoff, France [corre@sb-roscoff.fr](mailto:corre@sb-roscoff.fr)

\*Correspondence: [remi.allio@umontpellier.fr](mailto:remi.allio@umontpellier.fr), [frederic.delsuc@umontpellier.fr](mailto:frederic.delsuc@umontpellier.fr)

**Figure S1:** Plot of the quality of Nanopore long reads base-called with either the *fast* or the *high accuracy* option of Guppy v3.1.5. The quality of the base-calling step has a large impact on the final quality of the assemblies by reducing the number of contigs and increasing the N50 value.

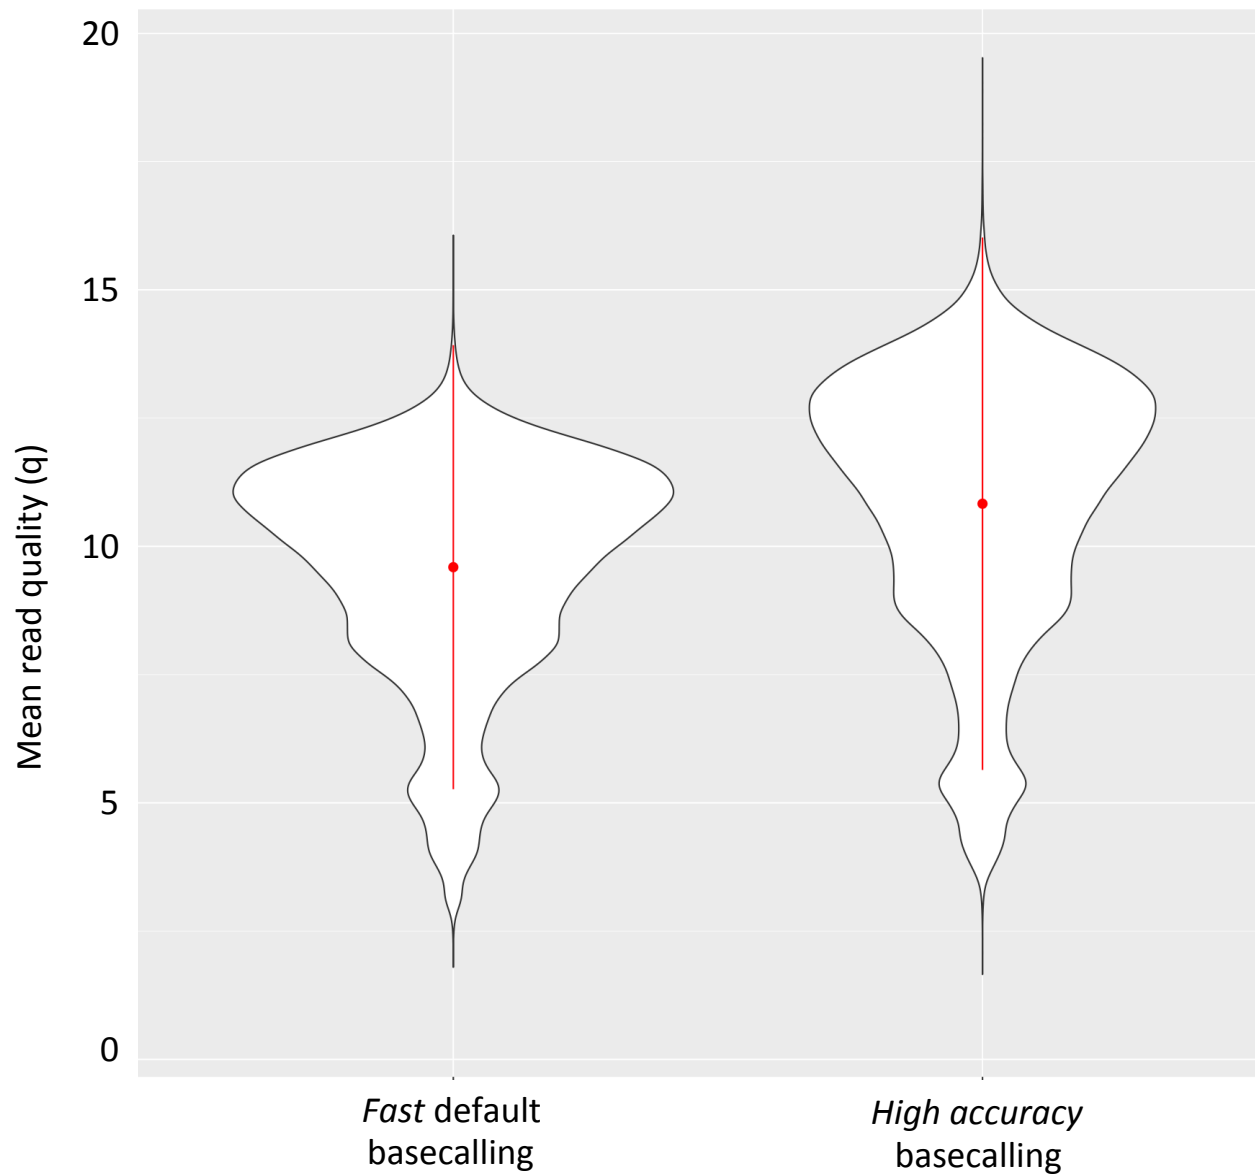

**Aardwolf**

*Fast default*  
basecalling

*High accuracy*  
basecalling

**Contigs:** 8,874

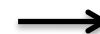

5,669

**N50:** 699 Kb

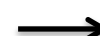

1.31 Mb

**Bat-eared fox**

*Fast default*  
basecalling

*Higher accuracy*  
basecalling

**Contigs:** 12,735

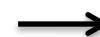

11,081

**N50:** 676 Kb

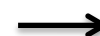

728 Kb

**Figure S2:** Definition of the genetic differentiation index (GDI) based on the F-statistic (FST). The main difference between these two indexes is the use of heterozygous allele states for GDI rather than real polymorphism for the FST. Green =  $\pi_{\text{within}}$ , Orange =  $\pi_{\text{between}}$ , Blue = Population A, Red = Population A+B.

F-Statistic:

$$F_{ST} = 1 - \frac{\pi_{within}}{\pi_{between}}$$

Hudson et al 1992

F<sub>ST</sub> = 1 = Highly structured

F<sub>ST</sub> = 0 = No structuration

Genetic differentiation index (GDI, based on heterozygosity):

| Fixed<br>AA/TT | Private A<br>AT/AA | Private B<br>AA/AT | Shared<br>AT/AT |
|----------------|--------------------|--------------------|-----------------|
|----------------|--------------------|--------------------|-----------------|

$$\pi_{AB} = \text{fixed} + \text{private}_A + \text{private}_B + \text{shared}_{AB}$$

$$\pi_A = \text{private}_A + \text{shared}_{AB}$$

$$\pi_B = \text{private}_B + \text{shared}_{AB}$$

$$1 - \frac{(\pi_A + \pi_B) / 2}{\pi_{tot AB}}$$

For different population level:

$$1 - \frac{(\pi_{A1} + \pi_{A2}) / 2}{\pi_{tot A}}$$

GDI within pop A  
(control)

vs

$$1 - \frac{(\pi_{A1} + \pi_{B1}) / 2}{\pi_{tot A1B1}}$$

global GDI

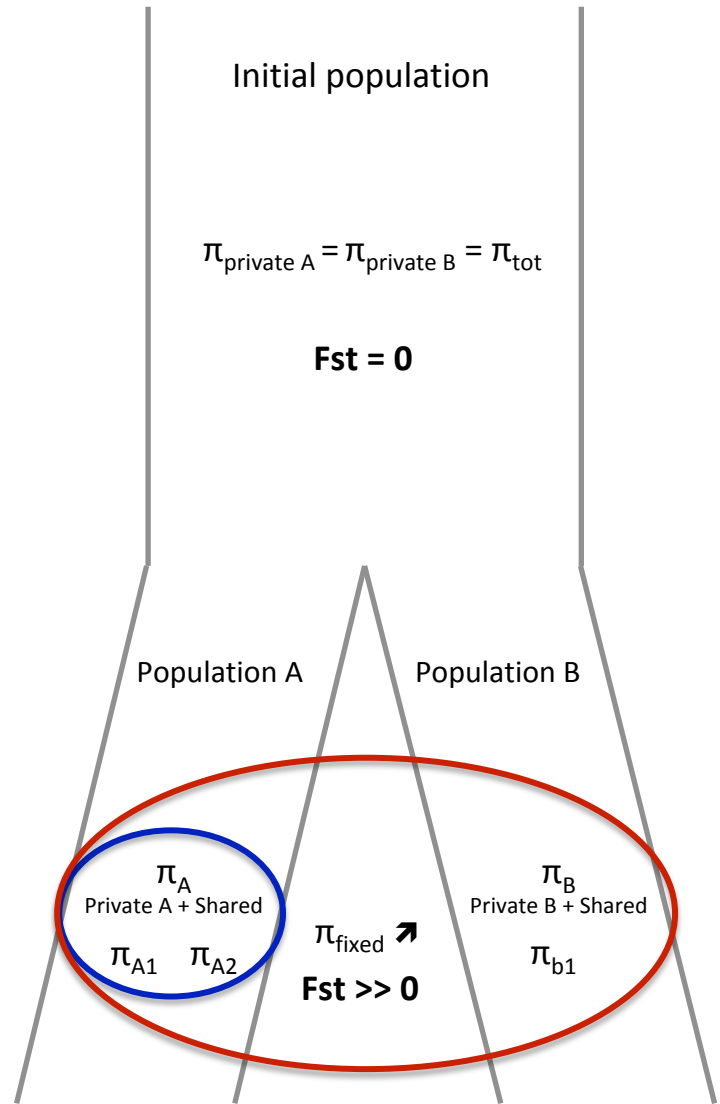



**Figure S3:** Graphical representation of the results of contamination analyses performed with BlobTools for a) the aardwolf (*Proteles cristata*) and b) the bat-eared fox (*Otocyon megalotis*).

## a) BlobTools results for *Proteles cristatus*

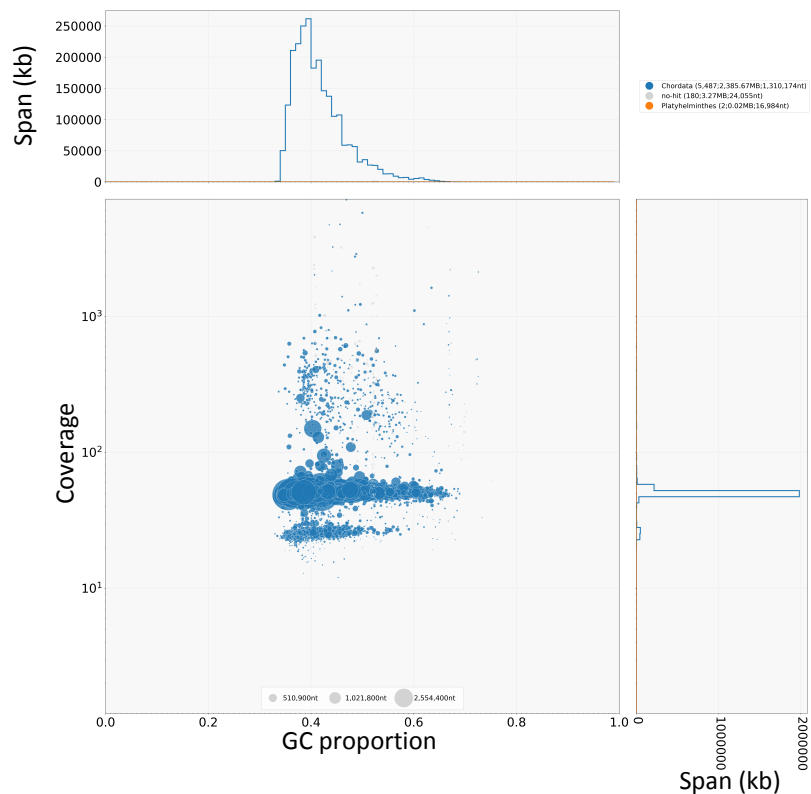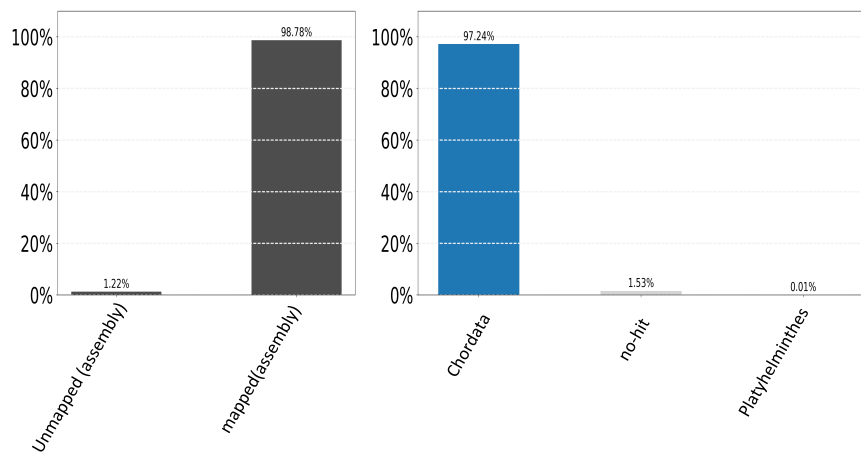

## b) BlobTools results for *Otocyon megalotis*

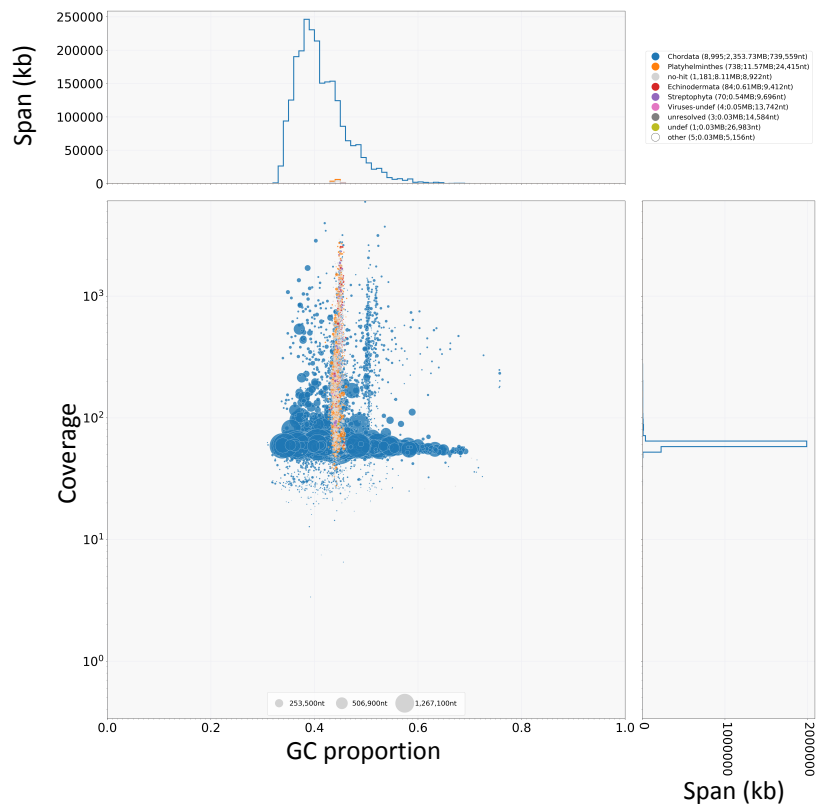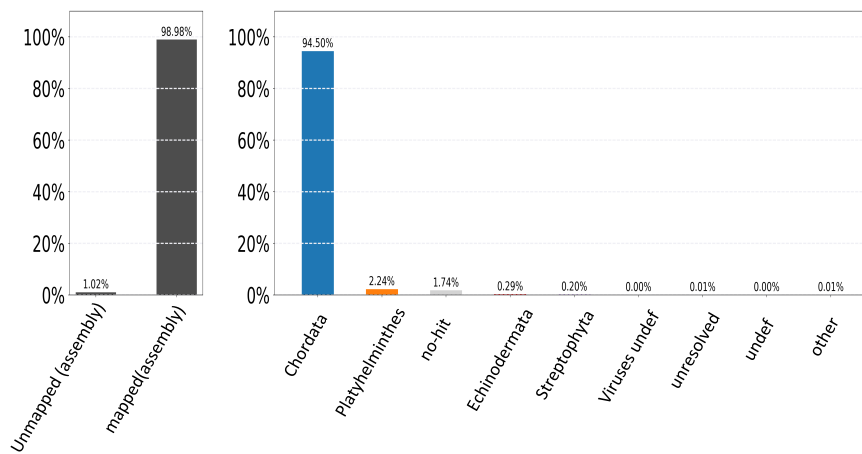

**Table S1:** Pairwise patristic distances estimated for the 142 species based on the phylogenetic tree inferred with the 15 mitochondrial loci (2 rRNAs and 13 protein-coding genes).

**SEE XLS FILES**

**Table S2:** Results of Bayesian dating for the two nodes leading to the *Proteles cristata* spp. and the *Otocyon megalotis* spp.. Divergence time estimates based on UGAM and LN models are reported with associated 95% credibility intervals for each MCMC chain.

Feuille1

| Species pair                                            | LN                          |                             |                             | UGAM                        |                             |                            |
|---------------------------------------------------------|-----------------------------|-----------------------------|-----------------------------|-----------------------------|-----------------------------|----------------------------|
|                                                         | Chain 1                     | Chain 2                     | Chain 3                     | Chain 1                     | Chain 2                     | Chain 3                    |
| Proteles cristata/ Proteles septentrionalis             | 1.228 [IC 95%: 5.34 - 0.58] | 1.014 [IC 95%: 3.01 - 0.56] | 0.841 [IC 95%: 1.26 - 0.55] | 1.327 [IC 95%: 1.86 - 0.93] | 1.335 [IC 95%: 1.86 - 0.94] | 1.34 [IC 95%: 1.88 - 0.94] |
| Otocyon megalotis megalotis/ Otocyon megalotis virgatus | 1.295 [IC 95%: 6.72 - 0.43] | 1.007 [IC 95%: 2.61 - 0.52] | 0.865 [IC 95%: 1.45 - 0.48] | 0.569 [IC 95%: 0.81 - 0.39] | 0.573 [IC 95%: 0.83 - 0.39] | 0.57 [IC 95%: 0.82 - 0.40] |

**Table S3:** Sample details and assembly statistics (Number of contigs/scaffolds and associated N50 values) for the 503 mammalian assemblies retrieved from NCBI (<https://www.ncbi.nlm.nih.gov/assembly>) on August 13th, 2019 with filters: “Exclude derived from surveillance project”, “Exclude anomalous”, “Exclude partial”, and using only the RefSeq assembly for *Homo sapiens*.

**SEE XLS FILES**

**Table S4:** Genome completeness assessment of MaSuRCA and SOAPdenovo assemblies obtained for *Proteles cristata* and *Otocyon megalotis* together with the 63 carnivore assemblies available at NCBI and DNAZoo (<https://www.dnazoo.org/assemblies>) on August 13th, 2019 using Benchmarking Universal Single-Copy Orthologs (BUSCO) v3 with the Mammalia OrthoDB 9 BUSCO gene set.

**SEE XLS FILES**



**Table S5:** Annotation summary and supermatrix composition statistics of the 53 species used to infer the genome-scale Carnivora phylogeny.

| Species                           | Maker annotated genes | Number of orthologous genes after cleaning | Missing data |
|-----------------------------------|-----------------------|--------------------------------------------|--------------|
| <i>Acinonyx jubatus</i>           | NA                    | 12751                                      | 16.54        |
| <i>Ailuropoda melanoleuca</i>     | NA                    | 13411                                      | 9.57         |
| <i>Ailurus fulgens</i>            | 17619                 | 11675                                      | 26.14        |
| <i>Arctocephalus gazella</i>      | 13714                 | 8390                                       | 60.29        |
| <i>Bassariscus sumichrasti</i>    | 17573                 | 11713                                      | 26.97        |
| <i>Callorhinus ursinus</i>        | 46164                 | 7398                                       | 53.35        |
| <i>Canis lupus familiaris</i>     | NA                    | 13808                                      | 6.04         |
| <i>Crocuta Crocuta</i>            | 16828                 | 11525                                      | 29.17        |
| <i>Cryptoprocta ferox</i>         | 18199                 | 12244                                      | 20.82        |
| <i>Enhydra lutris</i>             | NA                    | 13746                                      | 4.67         |
| <i>Eumetopias jubatus</i>         | 39926                 | 8515                                       | 46.70        |
| <i>Felis catus</i>                | NA                    | 13047                                      | 11.98        |
| <i>Gulo gulo</i>                  | 19696                 | 8939                                       | 48.42        |
| <i>Helogale parvula</i>           | 18484                 | 12005                                      | 23.92        |
| <i>Hyaena hyaena</i>              | 17663                 | 12169                                      | 22.27        |
| <i>Leptonychotes weddellii</i>    | NA                    | 12439                                      | 22.57        |
| <i>Lutra lutra</i>                | 32278                 | 12304                                      | 19.89        |
| <i>Lycaon pictus</i>              | 18068                 | 11405                                      | 27.75        |
| <i>Lynx canadensis</i>            | 44864                 | 7203                                       | 56.76        |
| <i>Lynx pardinus</i>              | 31025                 | 9961                                       | 39.55        |
| <i>Manis javanica</i>             | NA                    | 12441                                      | 18.81        |
| <i>Mellivora capensis</i>         | 18194                 | 12146                                      | 22.63        |
| <i>Mirounga angustirostris</i>    | 32777                 | 12305                                      | 19.37        |
| <i>Mungos mungo</i>               | 18832                 | 12241                                      | 21.30        |
| <i>Mustela putorius</i>           | NA                    | 13172                                      | 8.70         |
| <i>Nasua narica</i>               | 16858                 | 11442                                      | 29.08        |
| <i>Neofelis nebulosa</i>          | 29785                 | 12614                                      | 18.28        |
| <i>Neomonachus schauinslandi</i>  | NA                    | 13690                                      | 5.80         |
| <i>Neovison vison</i>             | 17294                 | 11848                                      | 26.03        |
| <i>Odobenus rosmarus</i>          | NA                    | 13705                                      | 5.14         |
| <i>Otocyon megalotis</i>          | 18996                 | 11981                                      | 22.02        |
| <i>Panthera leo</i>               | 17539                 | 12162                                      | 22.91        |
| <i>Panthera onca</i>              | 16942                 | 11758                                      | 27.22        |
| <i>Panthera pardus</i>            | NA                    | 13731                                      | 5.49         |
| <i>Panthera tigris</i>            | NA                    | 12841                                      | 15.37        |
| <i>Paradoxurus hermaphroditus</i> | 17278                 | 11387                                      | 30.18        |
| <i>Phoca vitulina</i>             | 18387                 | 12057                                      | 22.73        |
| <i>Potos flavus</i>               | 27890                 | 12234                                      | 22.80        |
| <i>Prionailurus bengalensis</i>   | 18057                 | 12172                                      | 22.88        |
| <i>Procyon lotor</i>              | 16572                 | 11165                                      | 32.46        |
| <i>Proteles septentrionalis</i>   | NA                    | 12050                                      | 22.43        |
| <i>Proteles cristatus</i>         | 17570                 | 12062                                      | 22.96        |
| <i>Pteronura brasiliensis</i>     | 18445                 | 12332                                      | 20.62        |
| <i>Puma concolor</i>              | 23358                 | 10853                                      | 28.62        |
| <i>Spilogale gracilis</i>         | 17606                 | 11744                                      | 26.61        |
| <i>Suricata suricatta</i>         | 17398                 | 11707                                      | 26.32        |
| <i>Taxidea taxus</i>              | 15586                 | 10141                                      | 42.19        |
| <i>Ursus americanus</i>           | 17694                 | 11670                                      | 27.53        |
| <i>Ursus arctos</i>               | 18003                 | 12145                                      | 22.21        |
| <i>Ursus maritimus</i>            | NA                    | 13111                                      | 13.56        |
| <i>Ursus thibetanus</i>           | 18365                 | 12092                                      | 22.87        |
| <i>Vulpes vulpes</i>              | 18511                 | 11688                                      | 26.02        |
| <i>Zalophus californianus</i>     | NA                    | 6305                                       | 64.65        |

**Table S6.** Sample details, Illumina sequencing, and assembly statistics of the 10 newly assembled carnivoran mitochondrial genomes.

| Species                   | Common name            | Collection    | Origin        | Sample | Raw reads  | Mito reads | Mean     |               | Genbank   |
|---------------------------|------------------------|---------------|---------------|--------|------------|------------|----------|---------------|-----------|
|                           |                        | number        |               | type   |            |            | coverage | SRA Accession | Accession |
| <i>Proteles cristata</i>  |                        |               |               |        |            |            |          |               |           |
| <i>cristata</i>           | Southern aardwolf      | NMB (TS307)   | South Africa  | Tissue | 4,779,321  | 6,665      | 39x      | Pending       | Pending   |
| <i>Proteles cristata</i>  |                        |               |               |        |            |            |          |               |           |
| <i>septentrionalis</i>    | Eastern aardwolf       | NMS Z.2018.54 | Tanzania      | Tissue | 7,597,504  | 2,709      | 19x      | Pending       | Pending   |
| <i>Otocyon megalotis</i>  |                        |               |               |        |            |            |          |               |           |
| <i>megalotis</i>          | Southern bat-eared fox | NMB (TS305)   | South Africa  | Tissue | 6,719,302  | 4,559      | 27x      | Pending       | Pending   |
| <i>Otocyon megalotis</i>  |                        |               |               |        |            |            |          |               |           |
| <i>virgatus</i>           | Eastern bat-eared fox  | FMNH 158128   | Tanzania      | Tissue | 6,838,309  | 37,719     | 219x     | Pending       | Pending   |
| <i>Speothos venaticus</i> | Bush dog               | ISEM T1624    | French Guiana | Tissue | 5,271,782  | 4,763      | 27x      | Pending       | Pending   |
| <i>Vulpes vulpes</i>      | Red fox                | ISEM T3611    | France        | Tissue | 8,355,398  | 3,050      | 18x      | Pending       | Pending   |
| <i>Parahyaena brunnea</i> |                        |               |               |        |            |            |          |               |           |
|                           | Brown hyaena           | ISEM FD126    | Toulon Zoo    | Feces  | 11,739,905 | 3,243      | 17x      | Pending       | Pending   |
| <i>Bdeogale nigripes</i>  |                        |               |               |        |            |            |          |               |           |
|                           | Black-footed mongoose  | FMNH 167685   | Gabon         | Tissue | 6,839,178  | 8,215      | 61x      | SRR6053065*   | Pending   |
| <i>Fossa fossana</i>      |                        |               |               |        |            |            |          |               |           |
|                           | Malagasy civet         | FMNH 156648   | Madagascar    | Tissue | 4,914,258  | 17,689     | 131x     | SRR6053060*   | Pending   |
| <i>Viverra tangalunga</i> |                        |               |               |        |            |            |          |               |           |
|                           | Malayan civet          | FMNH 146957   | Philippines   | Tissue | 5,648,442  | 23,116     | 205x     | SRR6053069*   | Pending   |

\*: UCE capture reads from Esselstyn et al. (2017); NMB: National Museum, Bloemfontein, South Africa; ISEM: Institut des Sciences de l'Evolution, Montpellier, France; FMNH: Field Museum of Natural History, Chicago, IL, USA.

**Table S7:** Node calibrations used for the Bayesian dating inferences based on mitogenomic data.

| <b>Node</b>                                       | <b>upper limit (My)</b> | <b>lower limit (My)</b> |
|---------------------------------------------------|-------------------------|-------------------------|
| Felis_catus,Lynx_lynx                             | NA                      | 5.3                     |
| Felis_catus,Panthera_onca                         | 16.4                    | NA                      |
| Felis_catus,Prionodon_pardicolor                  | NA                      | 28.5                    |
| Proteles_cristatus_cristatus_TS307,Hyaena_hyaena  | 16.4                    | NA                      |
| Urva_javanica,Fossa_fossana_FMNH156648_SRR6053060 | NA                      | 16.4                    |
| Proteles_cristatus_cristatus_TS307,Urva_javanica  | NA                      | 16.4                    |
| Civettictis_civetta,Genetta_servalina             | NA                      | 11.2                    |
| Canis_lupus,Urocyon_cinereoargenteus              | NA                      | 5.3                     |
| Mephitis_mephitis,Spilogale_putorius              | NA                      | 1.8                     |
| Procyon_lotor,Nasua_nasua                         | NA                      | 11.2                    |
| Nasua_nasua,Ailurus_fulgens                       | NA                      | 16.4                    |
| Arctocephalus_pusillus,Zalophus_californianus     | NA                      | 1.8                     |
| Mirounga_leonina,Phoca_fasciata                   | NA                      | 11.2                    |
| Arctocephalus_pusillus,Phoca_fasciata             | NA                      | 16.4                    |
| Arctocephalus_pusillus,Nasua_nasua                | NA                      | 28.5                    |
| Ursus_arctos,Ailuropoda_melanoleuca               | NA                      | 3.5                     |
| Canis_lupus,Ursus_arctos                          | NA                      | 37                      |
| Felis_catus,Canis_lupus                           | 65.8                    | 50                      |

**Table S8:** Results of contamination analyses performed with BlobTools for the aardwolf (*Proteles cristata*).

**Table S9:** Results of contamination analyses performed with BlobTools for the bat-eared fox (*Otocyon megalotis*).

**SEE XLS FILES**



**Table S10:** Summary information for the Carnivora genomes available either on Genbank, DNAZoo (<https://www.dnazoo.org>) and the OrthoMaM database as of February 11th, 2020. The “OMM” column indicates if the genome was available on OMM (yes) or not (no). The “Annotation” column indicates whether the genome was already annotated (yes) or not (no).

| Species                           | Order     | Family      | Accession                          | AssemblyName                              | Database | Assembly                                                             | Busco scores |            |         |        |            | OMM | Annotation |
|-----------------------------------|-----------|-------------|------------------------------------|-------------------------------------------|----------|----------------------------------------------------------------------|--------------|------------|---------|--------|------------|-----|------------|
|                                   |           |             |                                    |                                           |          |                                                                      | Complete     | Fragmented | Missing | Single | Duplicated |     |            |
| <i>Acinonyx jubatus</i>           | Carnivora | Felidae     | GCF_001443585.1                    | acilub1                                   | NCBI     | Acinonyx jubatus [acilub1]                                           | 90.5         | 6.0        | 3.5     | 90.2   | 0.3        | Yes | Yes        |
| <i>Alluropoda melanoloeuca</i>    | Carnivora | Ursidae     | GCF_000004335.2                    | AllMel_1.0                                | NCBI     | Alluropoda melanoloeuca [AllMel_1.0]                                 | 92.9         | 4.6        | 2.5     | 92.6   | 0.3        | Yes | Yes        |
| <i>Allurus fulgens</i>            | Carnivora | Ursidae     | ASM200746v1_DNAZoo_HIC             | ASM200746v1_DNAZoo_HIC                    | DNAZoo   | Allurus fulgens [ASM200746v1_DNAZoo_HIC]                             | 95.4         | 2.3        | 2.3     | 94.6   | 0.8        | No  | Yes        |
| <i>Arctocepalus gazella</i>       | Carnivora | Otariidae   | GCA_900500725.1                    | ArcGazv1.4                                | NCBI     | Arctocepalus gazella [ArcGazv1.4]                                    | 81.6         | 12.4       | 6.0     | 80.8   | 0.8        | No  | No         |
| <i>Calothrius ursinus</i>         | Carnivora | Otariidae   | GCF_003265705.1                    | ASM326570v1                               | NCBI     | Calothrius ursinus [ASM326570v1]                                     | 90.0         | 3.6        | 3.4     | 81.2   | 11.8       | No  | Yes        |
| <i>Canis lupus</i>                | Carnivora | Canidae     | GCF_000002285.3                    | CanFam3.1                                 | NCBI     | Canis lupus [CanFam3.1]                                              | 95.3         | 2.4        | 2.3     | 94.0   | 1.3        | Yes | Yes        |
| <i>Crocota crocata</i>            | Carnivora | Hyenidae    | GCA_008692635.1                    | BGI_CrCroc_1.0                            | NCBI     | Crocota crocata [BGI_CrCroc_1.0]                                     | 95.5         | 2.5        | 2.0     | 95.0   | 0.5        | No  | No         |
| <i>Cryptoprocta ferox</i>         | Carnivora | Eupleridae  | GCA_004023885.1                    | CryFer_v1_BIUU                            | NCBI     | Cryptoprocta ferox [CryFer_v1_BIUU]                                  | 85.9         | 10.6       | 3.5     | 84.9   | 1.0        | No  | No         |
| <i>Enhydra lutris</i>             | Carnivora | Mustelidae  | GCF_002288905.1                    | ASM228890v2                               | NCBI     | Enhydra lutris [ASM228890v2]                                         | 94.2         | 3.5        | 2.3     | 93.2   | 1.0        | Yes | Yes        |
| <i>Eumetopias jubatus</i>         | Carnivora | Otariidae   | GCF_004028035.1                    | ASMA02803v1                               | NCBI     | Eumetopias jubatus [ASMA02803v1]                                     | 93.4         | 3.7        | 2.9     | 91.2   | 2.2        | No  | Yes        |
| <i>Felis catus</i>                | Carnivora | Felidae     | GCF_000181335.3                    | Felis_catus_9.0                           | NCBI     | Felis catus [Felis_catus_9]                                          | 93.1         | 3.8        | 3.1     | 92.7   | 0.4        | Yes | Yes        |
| <i>Gulo gulo</i>                  | Carnivora | Mustelidae  | GCA_900006375.2                    | Gulo_2.2_annotated                        | NCBI     | Gulo gulo [Gulo_2.2]                                                 | 85.4         | 10.6       | 4.0     | 85.0   | 0.4        | No  | Yes        |
| <i>Helogale parvula</i>           | Carnivora | Herpestidae | GCA_004023845.1                    | HelPar_v1_BIUU                            | NCBI     | Helogale parvula [HelPar_v1_BIUU]                                    | 83.9         | 11.8       | 4.3     | 83.2   | 0.7        | No  | No         |
| <i>Hyæna hyæna</i>                | Carnivora | Hyenidae    | GCA_003009895.1                    | ASM300989v1                               | NCBI     | Hyæna hyæna [ASM300989v1]                                            | 93.5         | 4.0        | 2.5     | 92.8   | 0.7        | No  | No         |
| <i>Leptonyctotes weddellii</i>    | Carnivora | Phocidae    | GCF_000349705.1                    | LepWed1.0                                 | NCBI     | Leptonyctotes weddellii [LepWed1.0]                                  | 78.8         | 15.3       | 5.9     | 77.8   | 1.0        | Yes | Yes        |
| <i>Lutra lutra</i>                | Carnivora | Mustelidae  | mitLut1_DNAZoo_HIC                 | mitLut1_DNAZoo_HIC                        | DNAZoo   | Lutra lutra [mitLut1_DNAZoo_HIC]                                     | 95.5         | 2.2        | 2.3     | 94.1   | 1.4        | No  | Yes        |
| <i>Lycaon pictus</i>              | Carnivora | Canidae     | sis2-181106_DNAZoo_HIC             | sis2-181106_DNAZoo_HIC                    | DNAZoo   | Lycaon pictus [sis2-181106_DNAZoo_HIC]                               | 94.7         | 2.5        | 2.8     | 93.5   | 1.2        | No  | Yes        |
| <i>Lynx canadensis</i>            | Carnivora | Felidae     | GCA_007474595.1                    | mLynCan4_v1_p_VGPF                        | NCBI     | Lynx canadensis [mLynCan4_v1_p_VGPF]                                 | 94.6         | 2.7        | 2.7     | 94.2   | 0.4        | No  | Yes        |
| <i>Lynx pardus</i>                | Carnivora | Felidae     | GCA_900661375.1                    | LYPAL.0                                   | NCBI     | Lynx pardus [LYPAL.0]                                                | 94.4         | 3.1        | 2.5     | 93.9   | 0.5        | No  | Yes        |
| <i>Mellivora capensis</i>         | Carnivora | Mustelidae  | GCA_004024625.1                    | MelCap_v1_BIUU                            | NCBI     | Mellivora capensis [MelCap_v1_BIUU]                                  | 78.2         | 16.1       | 5.7     | 77.7   | 0.5        | No  | No         |
| <i>Mirounga angustirostris</i>    | Carnivora | Phocidae    | Mirounga_angustirostris_DNAZoo_HIC | Mirounga_angustirostris_DNAZoo_HIC        | DNAZoo   | Mirounga angustirostris [Mirounga_angustirostris_DNAZoo_HIC]         | 94.7         | 2.8        | 2.5     | 93.7   | 1.0        | No  | Yes        |
| <i>Mungos mungo</i>               | Carnivora | Herpestidae | GCA_004023785.1                    | MunMun_v1_BIUU                            | NCBI     | Mungos mungo [MunMun_v1_BIUU]                                        | 87.4         | 9.1        | 3.5     | 86.6   | 0.8        | No  | No         |
| <i>Mustela putorius</i>           | Carnivora | Mustelidae  | GCF_000215625.1                    | MusPutFur1.0                              | NCBI     | Mustela putorius [MusPutFur1.0]                                      | 93.5         | 3.9        | 2.6     | 92.9   | 0.6        | Yes | Yes        |
| <i>Nasua narica</i>               | Carnivora | Procyonidae | Nasua_narica_DNAZoo_HIC            | Nasua_narica_DNAZoo_HIC                   | DNAZoo   | Nasua narica [Nasua_narica_DNAZoo_HIC]                               | 90.7         | 5.0        | 4.3     | 90.1   | 0.6        | No  | No         |
| <i>Neofelis nebulosa</i>          | Carnivora | Felidae     | Neofelis_nebulosa_DNAZoo_HIC       | Neofelis_nebulosa_DNAZoo_HIC              | DNAZoo   | Neofelis nebulosa [Neofelis_nebulosa_DNAZoo_HIC]                     | 95.8         | 1.9        | 2.3     | 95.1   | 0.7        | No  | Yes        |
| <i>Neomonachus schauinslandi</i>  | Carnivora | Phocidae    | GCF_002201575.1                    | ASM220157v1                               | NCBI     | Neomonachus schauinslandi [ASM220157v1]                              | 93.0         | 4.3        | 2.7     | 91.9   | 1.1        | Yes | Yes        |
| <i>Neovison vison</i>             | Carnivora | Mustelidae  | GCA_900108605.1                    | NNQGG_v01                                 | NCBI     | Neovison vison [NNQGG_v01]                                           | 94.0         | 3.8        | 2.2     | 93.4   | 0.6        | No  | No         |
| <i>Odobenus rosmarus</i>          | Carnivora | Odobenidae  | GCF_000321225.1                    | Oros_1.0                                  | NCBI     | Odobenus rosmarus [Oros_1.0]                                         | 93.4         | 3.8        | 2.8     | 91.9   | 1.5        | Yes | Yes        |
| <i>Otocyon megalotis</i>          | Carnivora | Canidae     | ISEM_T3305_MaSuRCA                 | Otoc_meg_T3305_MaSuRCA                    | ISEM     | Otocyon megalotis [ISEM_T3305_MaSuRCA]                               | 92.9         | 4.2        | 2.9     | 91.7   | 1.2        | No  | No         |
| <i>Panthera leo</i>               | Carnivora | Felidae     | GCA_008795835.1                    | PanLeo1.0                                 | NCBI     | Panthera leo [PanLeo1.0]                                             | 96.2         | 1.9        | 1.9     | 95.6   | 0.6        | No  | No         |
| <i>Panthera onca</i>              | Carnivora | Felidae     | GCA_004023805.1                    | PanOnC_v1_BIUU                            | NCBI     | Panthera onca [PanOnC_v1_BIUU]                                       | 78.4         | 15.7       | 5.9     | 78.0   | 0.4        | No  | No         |
| <i>Panthera pardus</i>            | Carnivora | Felidae     | GCF_001837705.1                    | PanPar1.0                                 | NCBI     | Panthera pardus [PanPar1.0]                                          | 93.5         | 3.8        | 2.7     | 92.7   | 0.8        | Yes | Yes        |
| <i>Panthera tigris</i>            | Carnivora | Felidae     | GCF_000464555.1                    | PanTig1.0                                 | NCBI     | Panthera tigris [PanTig1.0]                                          | 91.5         | 5.3        | 3.2     | 91.2   | 0.3        | Yes | Yes        |
| <i>Paradoxurus hermaphroditus</i> | Carnivora | Viverridae  | GCA_004024585.1                    | ParHer_v1_BIUU                            | NCBI     | Paradoxurus hermaphroditus [ParHer_v1_BIUU]                          | 74.8         | 18.4       | 6.8     | 74.2   | 0.6        | No  | No         |
| <i>Phoca vitulina</i>             | Carnivora | Phocidae    | GSC_H5eal_1_0_DNAZoo_HIC           | GSC_H5eal_1_0_DNAZoo_HIC                  | DNAZoo   | Phoca vitulina [GSC_H5eal_1_0_DNAZoo_HIC]                            | 95.2         | 2.3        | 2.5     | 94.1   | 1.1        | No  | Yes        |
| <i>Potos flavus</i>               | Carnivora | Procyonidae | Potos_flavus_DNAZoo_HIC            | Potos_flavus_DNAZoo_HIC                   | DNAZoo   | Potos flavus [Potos_flavus_DNAZoo_HIC]                               | 92.7         | 4.4        | 2.9     | 92.2   | 0.5        | No  | Yes        |
| <i>Prionailurus bengalensis</i>   | Carnivora | Felidae     | GCA_005405085.1                    | Prionailurus_bengalensis_eupitillurus_v01 | NCBI     | Prionailurus bengalensis [Prionailurus_bengalensis_eupitillurus_v01] | 84.2         | 11.0       | 4.8     | 83.7   | 0.5        | No  | No         |
| <i>Procyon lotor</i>              | Carnivora | Procyonidae | pl-1k_DNAZoo_HIC                   | pl-1k_DNAZoo_HIC                          | DNAZoo   | Procyon lotor [pl-1k_DNAZoo_HIC]                                     | 87.8         | 7.2        | 5.0     | 87.2   | 0.6        | No  | Yes        |
| <i>Proteles cristatus</i>         | Carnivora | Hyenidae    | ISEM_T3307_MaSuRCA                 | Prot_cri_T3307_MaSuRCA                    | ISEM     | Proteles cristatus [ISEM_T3307_MaSuRCA]                              | 92.8         | 3.8        | 3.4     | 92.3   | 0.5        | No  | Yes        |
| <i>Pteronura brasiliensis</i>     | Carnivora | Mustelidae  | GCA_004024605.1                    | PteBra_v1_BIUU                            | NCBI     | Pteronura brasiliensis [PteBra_v1_BIUU]                              | 82.0         | 13.3       | 4.7     | 81.4   | 0.6        | No  | No         |
| <i>Puma concolor</i>              | Carnivora | Felidae     | GCF_003327715.1                    | PumCon1.0                                 | NCBI     | Puma concolor [PumCon1]                                              | 93.4         | 3.4        | 3.2     | 93.0   | 0.4        | No  | Yes        |
| <i>Spilogale gracilis</i>         | Carnivora | Mephitidae  | GCA_004023965.1                    | SpIGra_v1_BIUU                            | NCBI     | Spilogale gracilis [SpIGra_v1_BIUU]                                  | 97.6         | 17.1       | 6.2     | 76.1   | 0.6        | No  | Yes        |
| <i>Suricata suricatta</i>         | Carnivora | Herpestidae | GCF_006229205.1                    | meerkat_22Aug2017_6uvM2_HIC               | DNAZoo   | Suricata suricatta [meerkat_22Aug2017_6uvM2_DNAZoo_HIC]              | 94.7         | 2.6        | 2.7     | 93.5   | 1.2        | No  | Yes        |
| <i>Taxidea taxus</i>              | Carnivora | Mustelidae  | GCA_003697995.1                    | ASM369799v1                               | NCBI     | Taxidea taxus [ASM369799v1]                                          | 58.5         | 28.4       | 13.1    | 57.5   | 1.0        | No  | No         |
| <i>Ursus americanus</i>           | Carnivora | Ursidae     | ASM33442v1_DNAZoo_HIC              | ASM33442v1_DNAZoo_HIC                     | DNAZoo   | Ursus americanus [ASM33442v1_DNAZoo_HIC]                             | 93.9         | 3.3        | 2.8     | 93.3   | 0.6        | No  | Yes        |
| <i>Ursus arctos</i>               | Carnivora | Ursidae     | ASM358476v1_DNAZoo_HIC             | ASM358476v1_DNAZoo_HIC                    | DNAZoo   | Ursus arctos [ASM358476v1_DNAZoo_HIC]                                | 95.7         | 2.0        | 2.3     | 94.8   | 0.9        | No  | Yes        |
| <i>Ursus maritimus</i>            | Carnivora | Ursidae     | GCF_000687225.1                    | UrsMar_1.0                                | NCBI     | Ursus maritimus [UrsMar_1]                                           | 91.8         | 5.5        | 2.7     | 91.4   | 0.4        | Yes | Yes        |
| <i>Ursus thibetanus</i>           | Carnivora | Ursidae     | GCA_009660055.1                    | ASM966005v1                               | NCBI     | Ursus thibetanus [ASM966005v1]                                       | 95.8         | 1.8        | 2.4     | 94.4   | 1.4        | No  | No         |
| <i>Vulpes vulpes</i>              | Carnivora | Canidae     | VuVulV2_2_DNAZoo_HIC               | VuVulV2_2_DNAZoo_HIC                      | NCBI     | Vulpes vulpes [VuVulV2_2_DNAZoo_HIC]                                 | 94.7         | 2.8        | 2.5     | 93.3   | 1.4        | No  | Yes        |
| <i>Zalophus californianus</i>     | Carnivora | Otariidae   | GCF_900631625.1                    | zalCalZ.2                                 | NCBI     | Zalophus californianus [zalCalZ.2]                                   | 93.3         | 3.7        | 3.0     | 91.8   | 1.5        | No  | Yes        |
